# Supplementary material
Source: PubMed Central journal article supplement (PMC3119131)
Supplement: supp_japplphysiol.00079.2011_tableS1.pdf [file supp_japplphysiol.00079.2011_tableS1.pdf]

**Table S1.** Estimated parameters and regression coefficient values for the sinusoidal curve  $A\sin(Bt+C)+\text{mean}$  for individual probe sets mined for circadian oscillations in expression

| Probe set ID | $R^2$ | Mean  | A      | B     | C       |
|--------------|-------|-------|--------|-------|---------|
| 1390430_at   | 0.976 | 1.292 | -1.206 | 0.266 | -4.694  |
| 1393730_at   | 0.974 | 1.116 | -0.737 | 0.263 | -8.513  |
| 1370541_at   | 0.967 | 1.336 | -1.264 | 0.266 | -4.715  |
| 1367774_at   | 0.966 | 0.995 | -0.385 | 0.265 | -6.455  |
| 1370847_at   | 0.966 | 1.178 | -1.086 | 0.257 | -8.716  |
| 1370510_a_at | 0.964 | 1.199 | -0.992 | 0.257 | -8.111  |
| 1371940_at   | 0.964 | 0.989 | -0.181 | 0.261 | -9.139  |
| 1378174_at   | 0.964 | 1.212 | -0.654 | 0.259 | -8.457  |
| 1393927_at   | 0.964 | 0.970 | 0.473  | 0.263 | -12.182 |
| 1390199_at   | 0.959 | 0.986 | -0.271 | 0.260 | -8.379  |
| 1388176_at   | 0.957 | 1.064 | -0.824 | 0.262 | -5.581  |
| 1373114_at   | 0.955 | 0.976 | -0.396 | 0.265 | -8.534  |
| 1373727_at   | 0.955 | 1.056 | -0.488 | 0.264 | -8.436  |
| 1383680_at   | 0.952 | 0.999 | -0.251 | 0.261 | -9.405  |
| 1382031_at   | 0.95  | 0.965 | -0.620 | 0.265 | -6.446  |
| 1371832_at   | 0.949 | 0.969 | -0.301 | 0.264 | -8.117  |
| 1379467_at   | 0.948 | 1.027 | -0.826 | 0.264 | -6.353  |
| 1381409_at   | 0.948 | 0.904 | -0.449 | 0.264 | -7.908  |
| 1368869_at   | 0.947 | 1.056 | -0.410 | 0.260 | -8.755  |
| 1378745_at   | 0.945 | 1.582 | -1.491 | 0.268 | -4.940  |
| 1389322_at   | 0.943 | 1.013 | 0.194  | 0.259 | -11.701 |
| 1393696_at   | 0.942 | 1.011 | -0.522 | 0.266 | -8.730  |
| 1368795_at   | 0.939 | 1.076 | -0.512 | 0.262 | -8.699  |
| 1377635_at   | 0.939 | 1.068 | -0.841 | 0.265 | -6.205  |
| 1383439_at   | 0.938 | 1.566 | -1.574 | 0.259 | -8.640  |
| 1390255_at   | 0.938 | 0.988 | -0.283 | 0.259 | -8.954  |
| 1377116_at   | 0.937 | 0.988 | -0.177 | 0.260 | -9.195  |
| 1398773_at   | 0.936 | 1.007 | 0.176  | 0.263 | -6.818  |
| 1386895_at   | 0.934 | 0.996 | -0.128 | 0.258 | -9.593  |
| 1374784_at   | 0.933 | 1.001 | 0.177  | 0.263 | -7.150  |
| 1387074_at   | 0.933 | 0.970 | -0.258 | 0.257 | -3.777  |
| 1392149_at   | 0.932 | 1.028 | -0.216 | 0.266 | -4.939  |
| 1378482_at   | 0.929 | 1.009 | 0.205  | 0.261 | -11.109 |
| 1388902_at   | 0.927 | 0.980 | -0.379 | 0.261 | -9.031  |
| 1375138_at   | 0.926 | 1.057 | -0.376 | 0.263 | -5.942  |
| 1386641_at   | 0.926 | 1.103 | -0.781 | 0.264 | -5.288  |
| 1373578_at   | 0.925 | 1.018 | 0.241  | 0.269 | -12.135 |
| 1392510_at   | 0.925 | 1.042 | -0.330 | 0.266 | -5.984  |
| 1381533_at   | 0.924 | 1.000 | -0.420 | 0.263 | -8.033  |
| 1390517_at   | 0.922 | 0.981 | -0.162 | 0.262 | -9.555  |

**Table S1.** Estimated parameters and regression coefficient values for the sinusoidal curve  $A\sin(Bt+C)+\text{mean}$  for individual probe sets mined for circadian oscillations in expression

| Probe set ID | $R^2$ | Mean  | A      | B     | C       |
|--------------|-------|-------|--------|-------|---------|
| 1399030_at   | 0.922 | 1.062 | -0.299 | 0.253 | -8.692  |
| 1367860_a_at | 0.92  | 1.054 | 0.407  | 0.259 | -12.047 |
| 1374277_at   | 0.919 | 0.985 | -0.276 | 0.265 | -8.351  |
| 1370048_at   | 0.918 | 1.010 | -0.232 | 0.263 | -5.534  |
| 1371583_at   | 0.918 | 0.969 | -0.302 | 0.262 | -3.903  |
| 1381975_at   | 0.918 | 0.994 | -0.388 | 0.262 | -9.042  |
| 1376711_at   | 0.916 | 1.010 | -0.288 | 0.267 | -3.993  |
| 1369919_at   | 0.915 | 1.137 | -0.855 | 0.264 | -5.242  |
| 1367771_at   | 0.913 | 0.970 | -0.503 | 0.264 | -5.973  |
| 1372232_at   | 0.913 | 1.001 | -0.122 | 0.256 | -8.926  |
| 1376239_at   | 0.913 | 1.037 | -0.350 | 0.255 | -8.692  |
| 1367814_at   | 0.912 | 1.025 | -0.322 | 0.264 | -5.966  |
| 1390819_at   | 0.912 | 1.186 | -0.685 | 0.267 | -5.294  |
| 1391570_at   | 0.911 | 1.007 | -0.345 | 0.258 | -8.995  |
| 1394361_a_at | 0.911 | 1.049 | -0.532 | 0.265 | -9.226  |
| 1371923_at   | 0.909 | 0.992 | -0.269 | 0.260 | -8.749  |
| 1367905_at   | 0.908 | 1.038 | -0.401 | 0.267 | -8.676  |
| 1374575_at   | 0.908 | 0.972 | -0.412 | 0.260 | -8.420  |
| 1378982_at   | 0.908 | 1.074 | -0.497 | 0.270 | -5.155  |
| 1386864_at   | 0.908 | 1.008 | 0.079  | 0.256 | -11.085 |
| 1395986_at   | 0.908 | 1.011 | -0.263 | 0.262 | -3.827  |
| 1368304_at   | 0.907 | 1.164 | -0.905 | 0.266 | -5.772  |
| 1369943_at   | 0.907 | 1.046 | -0.224 | 0.256 | -8.010  |
| 1385374_at   | 0.907 | 1.200 | -0.739 | 0.266 | -5.152  |
| 1391240_at   | 0.907 | 0.942 | -0.479 | 0.259 | -8.035  |
| 1392990_at   | 0.907 | 1.011 | 0.180  | 0.261 | -10.851 |
| 1372926_at   | 0.906 | 1.026 | -0.416 | 0.258 | -5.837  |
| 1373195_at   | 0.906 | 1.016 | 0.260  | 0.261 | -6.631  |
| 1395178_at   | 0.906 | 1.110 | -0.534 | 0.267 | -5.477  |
| 1368172_a_at | 0.905 | 0.989 | -0.300 | 0.260 | -9.266  |
| 1390107_at   | 0.905 | 1.017 | -0.325 | 0.261 | -9.202  |
| 1372752_at   | 0.904 | 1.044 | -0.481 | 0.270 | -5.607  |
| 1373672_at   | 0.904 | 1.007 | 0.186  | 0.262 | -6.689  |
| 1374496_at   | 0.904 | 1.033 | -0.221 | 0.256 | -9.138  |
| 1368488_at   | 0.902 | 1.054 | -0.615 | 0.256 | -7.776  |
| 1370859_at   | 0.902 | 1.015 | 0.128  | 0.263 | -10.979 |
| 1367631_at   | 0.901 | 0.971 | -0.429 | 0.266 | -6.233  |
| 1378225_at   | 0.901 | 0.985 | 0.307  | 0.261 | -12.066 |
| 1386946_at   | 0.901 | 1.033 | -0.242 | 0.267 | -4.339  |
| 1393356_at   | 0.901 | 1.011 | 0.140  | 0.265 | -7.011  |

**Table S1.** Estimated parameters and regression coefficient values for the sinusoidal curve  $A\sin(Bt+C)+\text{mean}$  for individual probe sets mined for circadian oscillations in expression

| Probe set ID | $R^2$ | Mean  | A      | B     | C       |
|--------------|-------|-------|--------|-------|---------|
| 1368342_at   | 0.9   | 1.030 | -0.376 | 0.263 | -9.095  |
| 1371333_at   | 0.9   | 1.030 | 0.218  | 0.265 | -6.650  |
| 1389404_at   | 0.9   | 0.992 | -0.385 | 0.259 | -8.015  |
| 1392670_at   | 0.9   | 1.014 | 0.166  | 0.265 | -6.816  |
| 1395753_at   | 0.9   | 1.390 | -0.998 | 0.255 | -8.038  |
| 1387970_at   | 0.899 | 0.973 | 0.233  | 0.259 | -6.444  |
| 1392177_at   | 0.899 | 1.017 | -0.226 | 0.262 | -5.208  |
| 1368778_at   | 0.898 | 1.019 | -0.289 | 0.266 | -5.078  |
| 1394919_at   | 0.898 | 1.020 | -0.322 | 0.264 | -8.961  |
| 1367729_at   | 0.897 | 0.993 | -0.131 | 0.265 | -7.065  |
| 1369636_at   | 0.897 | 1.039 | -0.264 | 0.266 | -5.577  |
| 1369136_at   | 0.896 | 1.132 | -0.968 | 0.264 | -5.611  |
| 1370209_at   | 0.896 | 1.091 | -0.397 | 0.268 | -5.130  |
| 1374591_at   | 0.895 | 1.012 | 0.231  | 0.259 | -6.717  |
| 1376702_at   | 0.895 | 1.000 | -0.502 | 0.266 | -6.264  |
| 1372042_at   | 0.894 | 0.989 | -0.218 | 0.265 | -9.524  |
| 1374065_at   | 0.894 | 1.033 | 0.252  | 0.260 | -11.747 |
| 1383641_at   | 0.894 | 1.013 | -0.326 | 0.263 | -8.942  |
| 1368256_at   | 0.893 | 1.101 | -0.456 | 0.262 | -5.929  |
| 1373681_at   | 0.893 | 1.048 | -0.290 | 0.256 | -8.287  |
| 1378462_at   | 0.893 | 1.006 | -0.233 | 0.263 | -9.357  |
| 1384285_at   | 0.893 | 1.015 | -0.301 | 0.265 | -8.389  |
| 1398873_at   | 0.893 | 0.988 | -0.143 | 0.259 | -9.192  |
| 1368422_at   | 0.892 | 0.994 | -0.339 | 0.264 | -9.026  |
| 1373882_at   | 0.892 | 1.053 | -0.620 | 0.265 | -3.474  |
| 1387101_at   | 0.892 | 0.990 | 0.193  | 0.264 | -11.608 |
| 1387294_at   | 0.891 | 1.003 | 0.178  | 0.260 | -11.744 |
| 1377695_at   | 0.89  | 0.991 | -0.316 | 0.261 | -7.249  |
| 1379597_at   | 0.89  | 0.981 | 0.181  | 0.262 | -6.819  |
| 1382914_at   | 0.89  | 1.001 | 0.198  | 0.263 | -11.495 |
| 1389355_at   | 0.89  | 1.005 | 0.154  | 0.262 | -11.368 |
| 1368868_at   | 0.889 | 1.097 | -0.353 | 0.256 | -8.427  |
| 1374709_at   | 0.889 | 1.178 | -0.669 | 0.267 | -5.303  |
| 1384469_at   | 0.889 | 1.035 | -0.307 | 0.265 | -5.085  |
| 1386097_at   | 0.889 | 1.025 | -0.401 | 0.261 | -5.218  |
| 1377330_at   | 0.888 | 1.024 | -0.415 | 0.258 | -8.221  |
| 1397184_at   | 0.888 | 0.991 | -0.315 | 0.263 | -3.603  |
| 1367982_at   | 0.887 | 1.093 | -0.425 | 0.268 | -5.411  |
| 1380425_at   | 0.886 | 1.009 | -0.186 | 0.263 | -9.452  |
| 1368200_at   | 0.884 | 1.033 | -0.291 | 0.257 | -8.226  |

**Table S1.** Estimated parameters and regression coefficient values for the sinusoidal curve  $A\sin(Bt+C)+\text{mean}$  for individual probe sets mined for circadian oscillations in expression

| Probe set ID | R <sup>2</sup> | Mean  | A      | B     | C       |
|--------------|----------------|-------|--------|-------|---------|
| 1368542_at   | 0.884          | 1.001 | 0.194  | 0.259 | -11.791 |
| 1369178_a_at | 0.884          | 0.985 | -0.292 | 0.264 | -9.065  |
| 1374991_at   | 0.884          | 1.017 | -0.264 | 0.267 | -5.157  |
| 1388640_at   | 0.884          | 1.051 | 0.225  | 0.254 | -11.498 |
| 1370540_at   | 0.883          | 1.345 | -1.208 | 0.268 | -4.776  |
| 1376619_at   | 0.883          | 1.016 | 0.232  | 0.261 | -6.744  |
| 1382385_at   | 0.883          | 0.970 | -0.200 | 0.257 | -9.249  |
| 1392203_at   | 0.883          | 1.033 | -0.239 | 0.265 | -8.308  |
| 1373524_at   | 0.882          | 1.016 | -0.174 | 0.264 | -9.318  |
| 1390727_at   | 0.882          | 0.988 | -0.219 | 0.263 | -9.175  |
| 1393062_at   | 0.882          | 0.989 | 0.105  | 0.259 | -11.949 |
| 1367866_at   | 0.881          | 1.001 | 0.200  | 0.262 | -6.911  |
| 1368144_at   | 0.881          | 1.017 | -0.270 | 0.261 | -4.216  |
| 1370019_at   | 0.881          | 0.967 | -0.363 | 0.262 | -6.063  |
| 1373315_at   | 0.881          | 0.961 | 0.413  | 0.262 | -6.127  |
| 1374349_at   | 0.881          | 1.005 | 0.171  | 0.265 | -8.257  |
| 1377982_at   | 0.881          | 1.032 | -0.377 | 0.254 | -8.180  |
| 1379043_at   | 0.881          | 1.006 | 0.199  | 0.260 | -11.097 |
| 1389456_at   | 0.881          | 1.003 | -0.254 | 0.262 | -8.311  |
| 1369871_at   | 0.88           | 1.005 | -0.737 | 0.264 | -6.471  |
| 1377369_at   | 0.88           | 0.999 | 0.147  | 0.259 | -6.730  |
| 1386529_at   | 0.88           | 1.008 | 0.270  | 0.266 | -6.766  |
| 1374855_at   | 0.879          | 1.009 | -0.755 | 0.270 | -5.371  |
| 1377163_at   | 0.879          | 1.020 | 0.164  | 0.259 | -11.290 |
| 1371636_at   | 0.878          | 1.025 | -0.104 | 0.262 | -8.964  |
| 1373887_at   | 0.878          | 1.036 | -0.221 | 0.266 | -4.119  |
| 1387896_at   | 0.878          | 1.037 | 0.170  | 0.260 | -6.646  |
| 1368408_at   | 0.877          | 1.002 | 0.193  | 0.261 | -11.444 |
| 1389836_a_at | 0.877          | 1.022 | -0.283 | 0.269 | -6.184  |
| 1372268_at   | 0.876          | 1.015 | 0.260  | 0.266 | -6.952  |
| 1393335_at   | 0.876          | 1.007 | 0.242  | 0.263 | -6.696  |
| 1374643_at   | 0.875          | 0.983 | -0.323 | 0.263 | -8.983  |
| 1383312_at   | 0.875          | 1.019 | -0.220 | 0.254 | -8.087  |
| 1390463_at   | 0.875          | 1.021 | 0.164  | 0.258 | -6.559  |
| 1392627_x_at | 0.875          | 1.019 | -0.187 | 0.264 | -5.063  |
| 1371818_at   | 0.874          | 0.984 | 0.091  | 0.257 | -7.628  |
| 1372801_at   | 0.874          | 0.982 | -0.150 | 0.259 | -9.444  |
| 1379333_at   | 0.874          | 0.985 | -0.385 | 0.264 | -8.960  |
| 1379732_at   | 0.874          | 0.986 | 0.212  | 0.259 | -11.369 |
| 1388527_at   | 0.874          | 0.976 | -0.219 | 0.261 | -9.225  |

**Table S1.** Estimated parameters and regression coefficient values for the sinusoidal curve  $A\sin(Bt+C)+\text{mean}$  for individual probe sets mined for circadian oscillations in expression

| Probe set ID | R <sup>2</sup> | Mean  | A      | B     | C       |
|--------------|----------------|-------|--------|-------|---------|
| 1389448_at   | 0.874          | 1.045 | -0.280 | 0.254 | -8.829  |
| 1388898_at   | 0.873          | 0.950 | -0.370 | 0.260 | -6.735  |
| 1393883_at   | 0.873          | 0.999 | 0.214  | 0.260 | -6.536  |
| 1369060_a_at | 0.872          | 1.010 | -0.140 | 0.263 | -9.181  |
| 1371864_at   | 0.872          | 1.107 | -0.378 | 0.268 | -5.128  |
| 1375945_at   | 0.872          | 1.026 | -0.261 | 0.266 | -4.100  |
| 1376574_at   | 0.872          | 1.021 | 0.195  | 0.256 | -11.448 |
| 1378156_at   | 0.872          | 1.023 | -0.412 | 0.267 | -6.060  |
| 1386937_at   | 0.872          | 1.051 | -0.310 | 0.262 | -5.785  |
| 1393610_at   | 0.872          | 1.062 | -0.311 | 0.261 | -5.165  |
| 1398431_at   | 0.872          | 1.038 | -0.230 | 0.259 | -7.879  |
| 1368473_at   | 0.871          | 1.009 | 0.219  | 0.256 | -11.330 |
| 1370524_at   | 0.871          | 1.014 | -0.143 | 0.259 | -9.021  |
| 1376208_at   | 0.871          | 0.976 | -0.245 | 0.263 | -5.688  |
| 1385585_at   | 0.871          | 1.189 | -0.634 | 0.270 | -5.281  |
| 1389007_at   | 0.871          | 1.021 | -0.249 | 0.257 | -9.076  |
| 1373905_at   | 0.87           | 1.003 | -0.168 | 0.261 | -9.266  |
| 1377198_at   | 0.87           | 1.019 | -0.204 | 0.256 | -9.004  |
| 1379359_at   | 0.87           | 0.990 | -0.165 | 0.265 | -9.533  |
| 1379405_at   | 0.87           | 1.047 | 0.304  | 0.261 | -6.552  |
| 1379833_at   | 0.87           | 0.941 | -0.488 | 0.266 | -6.867  |
| 1391946_at   | 0.87           | 0.995 | -0.319 | 0.261 | -8.514  |
| 1373850_at   | 0.869          | 1.006 | 0.171  | 0.265 | -8.405  |
| 1393075_at   | 0.869          | 1.058 | -0.317 | 0.266 | -7.153  |
| 1397380_at   | 0.869          | 0.995 | 0.134  | 0.259 | -7.775  |
| 1367759_at   | 0.868          | 1.015 | -0.238 | 0.264 | -9.375  |
| 1372512_at   | 0.868          | 1.008 | 0.173  | 0.256 | -11.597 |
| 1372002_at   | 0.867          | 1.005 | 0.173  | 0.265 | -11.753 |
| 1380777_at   | 0.867          | 1.123 | -0.425 | 0.269 | -5.456  |
| 1382302_at   | 0.867          | 1.019 | -0.302 | 0.265 | -8.538  |
| 1395030_at   | 0.867          | 1.073 | -0.498 | 0.268 | -4.723  |
| 1385229_at   | 0.866          | 1.072 | -0.586 | 0.259 | -5.691  |
| 1387561_at   | 0.866          | 0.993 | -0.413 | 0.258 | -5.380  |
| 1398894_at   | 0.866          | 1.013 | -0.157 | 0.255 | -8.806  |
| 1367720_at   | 0.865          | 1.009 | -0.157 | 0.266 | -9.440  |
| 1376523_at   | 0.865          | 0.996 | -0.326 | 0.263 | -5.176  |
| 1390901_at   | 0.865          | 0.973 | -0.214 | 0.265 | -9.316  |
| 1392301_at   | 0.865          | 1.026 | -0.207 | 0.253 | -8.825  |
| 1368303_at   | 0.864          | 1.034 | -0.822 | 0.267 | -5.843  |
| 1370816_at   | 0.864          | 2.598 | -3.440 | 0.270 | -4.355  |

**Table S1.** Estimated parameters and regression coefficient values for the sinusoidal curve  $A\sin(Bt+C)+\text{mean}$  for individual probe sets mined for circadian oscillations in expression

| Probe set ID | R <sup>2</sup> | Mean  | A      | B     | C       |
|--------------|----------------|-------|--------|-------|---------|
| 1381996_at   | 0.864          | 1.054 | -0.266 | 0.267 | -3.871  |
| 1391428_at   | 0.864          | 1.022 | 0.146  | 0.267 | -7.243  |
| 1394574_at   | 0.864          | 1.089 | -0.247 | 0.272 | -5.017  |
| 1397335_at   | 0.864          | 1.016 | -0.278 | 0.259 | -4.861  |
| 1373147_at   | 0.863          | 1.029 | 0.139  | 0.263 | -6.779  |
| 1375223_at   | 0.863          | 0.995 | 0.172  | 0.257 | -6.854  |
| 1383906_at   | 0.863          | 0.987 | -0.221 | 0.256 | -9.093  |
| 1388558_at   | 0.863          | 1.004 | 0.104  | 0.267 | -8.323  |
| 1390738_at   | 0.862          | 1.008 | 0.158  | 0.259 | -11.061 |
| 1393634_at   | 0.862          | 0.934 | -0.517 | 0.264 | -5.723  |
| 1373312_at   | 0.861          | 1.035 | -0.291 | 0.254 | -8.730  |
| 1373351_at   | 0.861          | 0.993 | -0.235 | 0.266 | -9.656  |
| 1375908_at   | 0.861          | 0.985 | -0.180 | 0.271 | -8.924  |
| 1378081_at   | 0.861          | 0.973 | 0.277  | 0.270 | -6.612  |
| 1387219_at   | 0.861          | 1.022 | -0.601 | 0.262 | -8.445  |
| 1388686_at   | 0.861          | 1.023 | -0.230 | 0.263 | -8.217  |
| 1392549_at   | 0.861          | 1.070 | -0.527 | 0.258 | -8.014  |
| 1370389_at   | 0.86           | 1.037 | 0.258  | 0.268 | -6.927  |
| 1372920_at   | 0.86           | 1.010 | -0.318 | 0.258 | -7.096  |
| 1376165_at   | 0.86           | 1.001 | -0.177 | 0.256 | -9.466  |
| 1380180_at   | 0.86           | 1.117 | -0.475 | 0.267 | -3.550  |
| 1382017_at   | 0.86           | 1.034 | -0.371 | 0.265 | -9.391  |
| 1387128_at   | 0.86           | 1.063 | -0.303 | 0.264 | -5.408  |
| 1372613_at   | 0.859          | 0.979 | -0.177 | 0.262 | -4.321  |
| 1375346_at   | 0.859          | 1.017 | -0.199 | 0.257 | -9.199  |
| 1378144_at   | 0.859          | 1.072 | -0.403 | 0.261 | -8.777  |
| 1384163_at   | 0.858          | 1.017 | 0.134  | 0.263 | -6.831  |
| 1388921_at   | 0.858          | 1.000 | -0.277 | 0.261 | -7.193  |
| 1392913_at   | 0.858          | 0.997 | 0.152  | 0.257 | -11.387 |
| 1393368_at   | 0.858          | 1.007 | -0.134 | 0.257 | -9.605  |
| 1371651_at   | 0.857          | 1.009 | -0.155 | 0.257 | -9.456  |
| 1378127_at   | 0.857          | 1.021 | -0.181 | 0.261 | -9.585  |
| 1390603_at   | 0.857          | 0.983 | -0.199 | 0.259 | -4.971  |
| 1397781_at   | 0.857          | 1.010 | 0.129  | 0.263 | -11.775 |
| 1373156_at   | 0.856          | 1.012 | 0.307  | 0.261 | -12.050 |
| 1388925_at   | 0.856          | 0.999 | -0.109 | 0.262 | -9.226  |
| 1390956_at   | 0.856          | 1.052 | -0.411 | 0.265 | -5.711  |
| 1370634_x_at | 0.855          | 1.118 | -0.432 | 0.254 | -8.150  |
| 1377194_a_at | 0.855          | 1.002 | -0.128 | 0.260 | -8.940  |
| 1388127_at   | 0.855          | 0.982 | -0.154 | 0.267 | -8.728  |

**Table S1.** Estimated parameters and regression coefficient values for the sinusoidal curve  $A\sin(Bt+C)+\text{mean}$  for individual probe sets mined for circadian oscillations in expression

| Probe set ID | R <sup>2</sup> | Mean  | A      | B     | C       |
|--------------|----------------|-------|--------|-------|---------|
| 1393314_at   | 0.855          | 1.055 | -0.300 | 0.257 | -9.027  |
| 1367550_a_at | 0.854          | 0.995 | -0.136 | 0.261 | -9.352  |
| 1372818_at   | 0.854          | 1.011 | 0.368  | 0.265 | -0.329  |
| 1375612_at   | 0.854          | 1.005 | 0.181  | 0.261 | -6.930  |
| 1382141_at   | 0.853          | 1.021 | 0.179  | 0.262 | -7.163  |
| 1385171_s_at | 0.853          | 0.971 | -0.238 | 0.263 | -7.133  |
| 1386807_at   | 0.853          | 1.058 | 0.414  | 0.263 | -12.234 |
| 1395966_at   | 0.853          | 1.009 | 0.172  | 0.266 | -8.048  |
| 1369115_at   | 0.852          | 1.022 | 0.215  | 0.265 | -8.558  |
| 1376909_at   | 0.852          | 1.078 | -0.277 | 0.272 | -4.750  |
| 1378342_at   | 0.852          | 0.976 | -0.296 | 0.265 | -8.929  |
| 1382993_at   | 0.852          | 0.994 | 0.179  | 0.254 | -11.107 |
| 1376623_at   | 0.851          | 1.001 | -0.117 | 0.268 | -4.912  |
| 1384260_at   | 0.851          | 1.054 | -0.200 | 0.271 | -4.541  |
| 1388433_at   | 0.851          | 0.977 | -0.275 | 0.269 | -7.094  |
| 1374615_at   | 0.85           | 0.999 | -0.166 | 0.259 | -9.335  |
| 1375362_at   | 0.85           | 0.988 | -0.188 | 0.260 | -9.069  |
| 1376880_at   | 0.85           | 1.005 | 0.078  | 0.257 | -7.228  |
| 1378415_at   | 0.85           | 1.012 | 0.206  | 0.256 | -8.374  |
| 1382363_at   | 0.85           | 0.936 | -0.453 | 0.256 | -5.266  |
| 1389340_at   | 0.85           | 1.016 | 0.174  | 0.261 | -6.828  |
| 1367668_a_at | 0.849          | 0.998 | -0.156 | 0.271 | -7.765  |
| 1368991_at   | 0.849          | 1.019 | -0.439 | 0.261 | -6.361  |
| 1379542_at   | 0.849          | 0.995 | -0.106 | 0.254 | -8.821  |
| 1382685_at   | 0.849          | 1.013 | -0.225 | 0.257 | -3.962  |
| 1387121_a_at | 0.849          | 1.028 | -0.255 | 0.262 | -5.664  |
| 1393933_at   | 0.849          | 0.985 | -0.180 | 0.260 | -9.664  |
| 1397409_s_at | 0.849          | 1.054 | -0.590 | 0.265 | -5.707  |
| 1371791_at   | 0.848          | 1.002 | 0.178  | 0.257 | -11.524 |
| 1372615_at   | 0.848          | 0.992 | 0.176  | 0.260 | -8.280  |
| 1381027_at   | 0.848          | 1.024 | 0.264  | 0.261 | -6.546  |
| 1388660_at   | 0.848          | 0.996 | -0.105 | 0.259 | -8.962  |
| 1367726_at   | 0.847          | 1.110 | -0.362 | 0.251 | -8.322  |
| 1370991_at   | 0.847          | 1.066 | -0.538 | 0.263 | -6.034  |
| 1373075_at   | 0.847          | 1.008 | -0.176 | 0.262 | -4.861  |
| 1376860_at   | 0.847          | 1.013 | -0.204 | 0.265 | -9.236  |
| 1384388_at   | 0.847          | 0.973 | 0.149  | 0.261 | -11.119 |
| 1384717_at   | 0.847          | 1.015 | -0.186 | 0.267 | -4.176  |
| 1387310_at   | 0.847          | 0.965 | -0.263 | 0.260 | -4.701  |
| 1392683_at   | 0.847          | 1.021 | -0.199 | 0.270 | -9.744  |

**Table S1.** Estimated parameters and regression coefficient values for the sinusoidal curve  $A\sin(Bt+C)+\text{mean}$  for individual probe sets mined for circadian oscillations in expression

| Probe set ID | R <sup>2</sup> | Mean  | A      | B     | C       |
|--------------|----------------|-------|--------|-------|---------|
| 1394779_at   | 0.847          | 1.018 | -0.229 | 0.259 | -3.999  |
| 1367741_at   | 0.846          | 1.044 | -0.338 | 0.267 | -5.617  |
| 1372565_at   | 0.846          | 1.075 | -0.303 | 0.253 | -8.301  |
| 1376061_at   | 0.845          | 0.962 | 0.260  | 0.256 | -6.323  |
| 1377940_at   | 0.845          | 0.979 | -0.251 | 0.263 | -7.586  |
| 1391338_at   | 0.845          | 0.983 | -0.207 | 0.259 | -9.357  |
| 1393508_at   | 0.845          | 1.004 | 0.319  | 0.267 | -6.512  |
| 1394721_at   | 0.845          | 0.981 | -0.146 | 0.259 | -5.778  |
| 1396144_at   | 0.845          | 0.964 | 0.296  | 0.263 | -6.316  |
| 1367755_at   | 0.844          | 1.085 | -0.489 | 0.268 | -6.048  |
| 1372274_at   | 0.844          | 1.009 | 0.063  | 0.256 | -6.696  |
| 1373151_at   | 0.844          | 0.986 | -0.111 | 0.255 | -9.493  |
| 1390384_at   | 0.844          | 1.030 | -0.145 | 0.255 | -7.822  |
| 1399001_at   | 0.844          | 1.000 | 0.066  | 0.258 | -7.256  |
| 1370283_at   | 0.843          | 1.012 | -0.210 | 0.264 | -7.518  |
| 1372938_at   | 0.843          | 1.009 | 0.090  | 0.260 | -6.179  |
| 1375278_at   | 0.843          | 0.967 | 0.225  | 0.269 | -11.996 |
| 1385926_at   | 0.843          | 1.013 | 0.215  | 0.268 | -11.966 |
| 1393263_at   | 0.843          | 0.983 | 0.176  | 0.258 | -11.634 |
| 1369500_at   | 0.842          | 1.032 | -0.212 | 0.261 | -5.564  |
| 1370363_at   | 0.842          | 1.003 | -0.206 | 0.272 | -6.968  |
| 1376198_at   | 0.842          | 1.004 | 0.242  | 0.256 | -11.574 |
| 1379483_at   | 0.842          | 1.102 | -0.385 | 0.270 | -5.292  |
| 1389632_at   | 0.842          | 0.984 | -0.158 | 0.266 | -5.557  |
| 1393432_a_at | 0.842          | 1.003 | -0.155 | 0.266 | -9.781  |
| 1395644_at   | 0.842          | 1.004 | -0.326 | 0.259 | -8.847  |
| 1395928_at   | 0.842          | 1.011 | -0.176 | 0.261 | -9.448  |
| 1368249_at   | 0.841          | 1.090 | -0.504 | 0.272 | -5.428  |
| 1371505_at   | 0.841          | 1.003 | 0.107  | 0.263 | -10.877 |
| 1371999_at   | 0.841          | 1.003 | -0.159 | 0.264 | -9.534  |
| 1372810_at   | 0.841          | 1.004 | -0.160 | 0.262 | -9.546  |
| 1381969_at   | 0.841          | 1.012 | -0.152 | 0.264 | -9.322  |
| 1382512_at   | 0.841          | 1.038 | -0.258 | 0.253 | -5.268  |
| 1383080_at   | 0.841          | 0.986 | -0.107 | 0.258 | -9.105  |
| 1384227_at   | 0.841          | 1.000 | -0.269 | 0.260 | -9.376  |
| 1385148_at   | 0.841          | 1.073 | 0.390  | 0.253 | -11.834 |
| 1387874_at   | 0.841          | 3.628 | -4.205 | 0.273 | -4.957  |
| 1389150_at   | 0.841          | 0.995 | -0.109 | 0.268 | -9.936  |
| 1397225_at   | 0.841          | 1.613 | -1.680 | 0.267 | -5.497  |
| 1398255_at   | 0.841          | 1.000 | -0.152 | 0.257 | -7.029  |



**Table S1.** Estimated parameters and regression coefficient values for the sinusoidal curve  $A\sin(Bt+C)+\text{mean}$  for individual probe sets mined for circadian oscillations in expression

| Probe set ID | $R^2$ | Mean  | A      | B     | C       |
|--------------|-------|-------|--------|-------|---------|
| 1382199_at   | 0.84  | 0.984 | -0.346 | 0.261 | -4.784  |
| 1387395_at   | 0.84  | 1.018 | -0.179 | 0.253 | -6.850  |
| 1388883_at   | 0.84  | 1.019 | -0.142 | 0.252 | -8.701  |
| 1392966_at   | 0.84  | 0.990 | -0.122 | 0.262 | -8.605  |
| 1373631_at   | 0.839 | 1.011 | 0.180  | 0.260 | -11.569 |
| 1375085_at   | 0.839 | 1.020 | -0.320 | 0.257 | -8.583  |
| 1382211_at   | 0.839 | 0.999 | -0.189 | 0.264 | -9.671  |
| 1385456_at   | 0.839 | 1.093 | -0.435 | 0.256 | -8.633  |
| 1387795_at   | 0.839 | 1.063 | -0.349 | 0.258 | -9.184  |
| 1392111_at   | 0.839 | 0.991 | 0.114  | 0.256 | -11.385 |
| 1372325_at   | 0.838 | 1.045 | 0.370  | 0.251 | -11.775 |
| 1377080_at   | 0.838 | 1.028 | 0.185  | 0.269 | -7.017  |
| 1381149_at   | 0.838 | 1.001 | -0.391 | 0.255 | -5.229  |
| 1383349_at   | 0.838 | 0.993 | 0.110  | 0.270 | -12.310 |
| 1390153_at   | 0.838 | 1.033 | -0.313 | 0.262 | -9.061  |
| 1394726_at   | 0.838 | 1.012 | 0.198  | 0.264 | -7.033  |
| 1370086_at   | 0.837 | 1.035 | -0.418 | 0.267 | -8.218  |
| 1382404_at   | 0.837 | 0.999 | -0.150 | 0.259 | -8.529  |
| 1388395_at   | 0.837 | 0.976 | -0.313 | 0.269 | -7.963  |
| 1397453_at   | 0.837 | 1.023 | -0.329 | 0.257 | -5.349  |
| 1370928_at   | 0.836 | 1.008 | 0.195  | 0.261 | -11.793 |
| 1373864_at   | 0.836 | 1.002 | -0.150 | 0.257 | -9.273  |
| 1374990_at   | 0.836 | 0.997 | 0.126  | 0.266 | -7.351  |
| 1385274_at   | 0.836 | 1.031 | 0.250  | 0.256 | -6.454  |
| 1398024_at   | 0.836 | 1.208 | -0.727 | 0.259 | -8.048  |
| 1368989_at   | 0.835 | 0.986 | -0.474 | 0.260 | -6.051  |
| 1372160_at   | 0.835 | 1.015 | -0.145 | 0.257 | -8.442  |
| 1376036_at   | 0.835 | 1.010 | -0.225 | 0.261 | -9.498  |
| 1378315_at   | 0.835 | 1.025 | 0.183  | 0.257 | -11.167 |
| 1382175_at   | 0.835 | 0.989 | -0.133 | 0.264 | -9.051  |
| 1386080_at   | 0.835 | 0.960 | -0.214 | 0.268 | -5.155  |
| 1393135_at   | 0.835 | 0.963 | 0.210  | 0.263 | -11.681 |
| 1398886_at   | 0.835 | 1.010 | 0.161  | 0.254 | -6.651  |
| 1390731_at   | 0.834 | 1.080 | -0.360 | 0.272 | -5.555  |
| 1391780_at   | 0.834 | 1.408 | -1.170 | 0.271 | -5.410  |
| 1395957_at   | 0.834 | 1.003 | -0.226 | 0.257 | -4.840  |
| 1369979_at   | 0.833 | 1.004 | -0.177 | 0.256 | -9.161  |
| 1372016_at   | 0.833 | 1.006 | -0.217 | 0.262 | -4.814  |
| 1379081_at   | 0.833 | 1.104 | -0.546 | 0.260 | -8.489  |
| 1381923_at   | 0.833 | 1.028 | -0.259 | 0.260 | -7.774  |

**Table S1.** Estimated parameters and regression coefficient values for the sinusoidal curve  $A\sin(Bt+C)+\text{mean}$  for individual probe sets mined for circadian oscillations in expression

| Probe set ID | R <sup>2</sup> | Mean  | A      | B     | C       |
|--------------|----------------|-------|--------|-------|---------|
| 1388271_at   | 0.833          | 1.028 | -0.352 | 0.263 | -5.792  |
| 1388412_at   | 0.833          | 1.000 | 0.078  | 0.261 | -6.218  |
| 1388426_at   | 0.833          | 0.994 | 0.227  | 0.264 | -11.081 |
| 1393806_at   | 0.833          | 1.009 | 0.136  | 0.256 | -6.500  |
| 1392249_at   | 0.832          | 1.020 | 0.154  | 0.260 | -7.738  |
| 1369725_at   | 0.831          | 1.034 | -0.236 | 0.271 | -5.501  |
| 1374355_at   | 0.831          | 0.969 | -0.265 | 0.258 | -9.287  |
| 1384501_at   | 0.831          | 1.018 | -0.184 | 0.266 | -5.150  |
| 1389085_at   | 0.831          | 0.970 | 0.217  | 0.263 | -10.754 |
| 1389341_at   | 0.831          | 0.986 | -0.312 | 0.262 | -9.104  |
| 1368964_at   | 0.83           | 0.979 | -0.227 | 0.264 | -9.192  |
| 1371899_at   | 0.83           | 0.998 | 0.119  | 0.254 | -5.946  |
| 1373364_at   | 0.83           | 0.977 | -0.144 | 0.262 | -9.319  |
| 1373401_at   | 0.83           | 0.967 | -0.440 | 0.261 | -3.382  |
| 1373477_at   | 0.83           | 1.008 | -0.083 | 0.259 | -9.029  |
| 1373654_at   | 0.83           | 1.007 | -0.244 | 0.271 | -6.922  |
| 1382534_at   | 0.83           | 1.022 | -0.196 | 0.265 | -5.518  |
| 1392675_at   | 0.83           | 1.123 | -0.626 | 0.261 | -5.329  |
| 1370332_at   | 0.829          | 1.111 | -0.411 | 0.250 | -8.221  |
| 1374434_at   | 0.829          | 1.052 | -0.350 | 0.274 | -5.438  |
| 1374885_at   | 0.829          | 0.995 | -0.166 | 0.266 | -9.772  |
| 1376481_at   | 0.829          | 1.069 | -0.237 | 0.258 | -7.887  |
| 1398913_at   | 0.829          | 1.018 | -0.100 | 0.253 | -8.809  |
| 1368016_at   | 0.828          | 0.992 | 0.202  | 0.273 | -9.875  |
| 1372317_at   | 0.828          | 1.021 | 0.149  | 0.256 | -11.045 |
| 1380318_at   | 0.828          | 1.055 | -0.488 | 0.270 | -3.565  |
| 1380829_at   | 0.828          | 0.956 | -0.531 | 0.264 | -9.051  |
| 1387145_at   | 0.828          | 1.024 | -0.302 | 0.261 | -7.918  |
| 1387781_at   | 0.828          | 1.007 | -0.112 | 0.256 | -8.757  |
| 1399092_at   | 0.828          | 1.020 | -0.183 | 0.251 | -8.580  |
| 1367577_at   | 0.827          | 0.997 | -0.255 | 0.270 | -6.769  |
| 1373934_at   | 0.827          | 1.023 | -0.163 | 0.265 | -9.094  |
| 1375529_at   | 0.827          | 1.022 | 0.147  | 0.259 | -6.539  |
| 1381408_at   | 0.827          | 1.001 | -0.132 | 0.250 | -8.766  |
| 1383047_at   | 0.827          | 1.010 | 0.092  | 0.270 | -7.127  |
| 1388769_at   | 0.827          | 1.004 | -0.138 | 0.258 | -8.912  |
| 1373923_at   | 0.826          | 1.021 | 0.145  | 0.266 | -8.017  |
| 1375692_at   | 0.826          | 1.006 | 0.099  | 0.258 | -7.145  |
| 1383368_at   | 0.826          | 0.990 | 0.164  | 0.260 | -6.566  |
| 1390145_at   | 0.826          | 1.040 | -0.179 | 0.266 | -9.615  |

**Table S1.** Estimated parameters and regression coefficient values for the sinusoidal curve  $A\sin(Bt+C)+\text{mean}$  for individual probe sets mined for circadian oscillations in expression

| Probe set ID | R <sup>2</sup> | Mean  | A      | B     | C       |
|--------------|----------------|-------|--------|-------|---------|
| 1395074_at   | 0.826          | 0.984 | -0.293 | 0.262 | -6.409  |
| 1383155_at   | 0.825          | 0.989 | 0.131  | 0.264 | -7.684  |
| 1383205_at   | 0.825          | 0.997 | -0.185 | 0.267 | -7.468  |
| 1383863_at   | 0.825          | 1.001 | -0.133 | 0.257 | -9.239  |
| 1390042_at   | 0.825          | 1.001 | 0.222  | 0.264 | -11.702 |
| 1379719_at   | 0.824          | 1.002 | -0.195 | 0.260 | -4.335  |
| 1383237_at   | 0.824          | 1.001 | 0.090  | 0.266 | -6.165  |
| 1389519_at   | 0.824          | 1.017 | 0.105  | 0.254 | -11.220 |
| 1390843_at   | 0.824          | 1.010 | 0.180  | 0.258 | -11.200 |
| 1370691_a_at | 0.823          | 0.996 | -0.273 | 0.255 | -9.034  |
| 1372319_at   | 0.823          | 1.013 | 0.203  | 0.263 | -8.488  |
| 1373298_at   | 0.823          | 0.990 | -0.168 | 0.257 | -9.275  |
| 1374078_at   | 0.823          | 1.030 | -0.176 | 0.253 | -8.677  |
| 1374346_at   | 0.823          | 1.051 | 0.238  | 0.263 | -11.882 |
| 1384097_at   | 0.823          | 1.031 | -0.408 | 0.260 | -8.843  |
| 1389289_at   | 0.823          | 1.007 | -0.089 | 0.262 | -9.156  |
| 1368171_at   | 0.822          | 0.968 | -0.255 | 0.269 | -9.380  |
| 1370203_at   | 0.822          | 1.011 | -0.165 | 0.256 | -9.093  |
| 1373576_at   | 0.822          | 1.006 | -0.102 | 0.256 | -9.592  |
| 1380055_at   | 0.822          | 0.967 | -0.307 | 0.269 | -6.435  |
| 1375640_at   | 0.821          | 1.000 | 0.087  | 0.256 | -7.842  |
| 1376175_at   | 0.821          | 1.101 | -0.293 | 0.259 | -4.920  |
| 1385838_a_at | 0.821          | 1.006 | -0.147 | 0.263 | -9.331  |
| 1389073_at   | 0.821          | 0.987 | 0.172  | 0.254 | -11.572 |
| 1389131_at   | 0.821          | 1.023 | -0.209 | 0.261 | -9.261  |
| 1392001_at   | 0.821          | 1.065 | -0.640 | 0.258 | -8.104  |
| 1399027_at   | 0.821          | 1.045 | 0.175  | 0.254 | -11.356 |
| 1369484_at   | 0.82           | 1.028 | -0.265 | 0.263 | -8.594  |
| 1372193_at   | 0.82           | 1.005 | -0.195 | 0.262 | -9.546  |
| 1373036_at   | 0.82           | 1.025 | 0.276  | 0.267 | -12.058 |
| 1377731_at   | 0.82           | 0.990 | 0.100  | 0.265 | -6.302  |
| 1388874_at   | 0.82           | 1.013 | -0.126 | 0.263 | -9.831  |
| 1373087_at   | 0.819          | 1.009 | -0.175 | 0.261 | -9.598  |
| 1380306_at   | 0.819          | 1.653 | -1.760 | 0.267 | -5.499  |
| 1385540_at   | 0.819          | 1.000 | -0.152 | 0.261 | -9.352  |
| 1392578_at   | 0.819          | 1.199 | -0.658 | 0.273 | -5.518  |
| 1392888_at   | 0.819          | 1.017 | -0.131 | 0.262 | -9.699  |
| 1395762_at   | 0.819          | 0.985 | -0.217 | 0.257 | -5.670  |
| 1370043_at   | 0.818          | 0.987 | 0.111  | 0.258 | -8.161  |
| 1376770_at   | 0.818          | 0.979 | -0.325 | 0.267 | -8.582  |

**Table S1.** Estimated parameters and regression coefficient values for the sinusoidal curve  $A\sin(Bt+C)+\text{mean}$  for individual probe sets mined for circadian oscillations in expression

| Probe set ID | R <sup>2</sup> | Mean  | A      | B     | C       |
|--------------|----------------|-------|--------|-------|---------|
| 1380100_at   | 0.818          | 0.978 | -0.331 | 0.264 | -9.271  |
| 1397764_at   | 0.818          | 0.979 | -0.155 | 0.263 | -9.402  |
| 1397915_at   | 0.818          | 1.004 | 0.149  | 0.258 | -7.964  |
| 1368080_at   | 0.817          | 1.000 | -0.212 | 0.268 | -5.644  |
| 1369635_at   | 0.817          | 1.017 | -0.258 | 0.259 | -5.665  |
| 1371731_at   | 0.817          | 1.025 | -0.297 | 0.257 | -8.639  |
| 1373076_at   | 0.817          | 1.010 | 0.213  | 0.261 | -6.676  |
| 1375056_at   | 0.817          | 1.000 | 0.109  | 0.265 | -7.265  |
| 1379982_at   | 0.817          | 0.998 | 0.094  | 0.256 | -8.346  |
| 1383611_at   | 0.817          | 0.998 | -0.151 | 0.262 | -9.619  |
| 1384904_at   | 0.817          | 1.083 | -0.406 | 0.267 | -5.868  |
| 1389138_at   | 0.817          | 1.011 | -0.156 | 0.269 | -9.617  |
| 1396620_at   | 0.817          | 0.960 | -0.325 | 0.260 | -8.725  |
| 1374368_at   | 0.816          | 1.021 | -0.191 | 0.267 | -9.469  |
| 1378292_at   | 0.816          | 0.952 | -0.329 | 0.259 | -6.107  |
| 1389613_at   | 0.816          | 1.018 | 0.167  | 0.266 | -6.783  |
| 1368202_a_at | 0.815          | 0.987 | 0.097  | 0.253 | -6.889  |
| 1371769_at   | 0.815          | 1.037 | -0.250 | 0.250 | -8.676  |
| 1387083_at   | 0.815          | 1.030 | 0.168  | 0.254 | -11.066 |
| 1388901_at   | 0.815          | 1.195 | -0.574 | 0.270 | -5.605  |
| 1389162_at   | 0.815          | 1.011 | -0.082 | 0.259 | -8.851  |
| 1390770_at   | 0.815          | 1.007 | -0.208 | 0.264 | -6.433  |
| 1370973_at   | 0.814          | 0.994 | -0.208 | 0.265 | -9.460  |
| 1373860_at   | 0.814          | 1.097 | -0.344 | 0.253 | -8.436  |
| 1374286_at   | 0.814          | 0.999 | 0.092  | 0.259 | -6.306  |
| 1378753_at   | 0.814          | 1.018 | -0.117 | 0.256 | -8.901  |
| 1389782_at   | 0.814          | 0.994 | -0.123 | 0.265 | -9.329  |
| 1376762_at   | 0.813          | 1.003 | -0.143 | 0.262 | -9.461  |
| 1393119_at   | 0.813          | 0.999 | -0.129 | 0.261 | -8.193  |
| 1372701_at   | 0.812          | 1.006 | -0.158 | 0.268 | -7.149  |
| 1372749_at   | 0.812          | 0.999 | 0.091  | 0.259 | -6.511  |
| 1376470_at   | 0.812          | 1.003 | 0.314  | 0.267 | -6.537  |
| 1377457_a_at | 0.812          | 0.992 | -0.185 | 0.259 | -9.629  |
| 1379433_at   | 0.812          | 0.970 | 0.150  | 0.254 | -7.883  |
| 1371046_at   | 0.811          | 0.981 | -0.267 | 0.255 | -4.647  |
| 1374798_at   | 0.811          | 1.025 | 0.181  | 0.272 | -6.866  |
| 1377789_at   | 0.811          | 0.971 | -0.223 | 0.266 | -9.728  |
| 1378010_at   | 0.811          | 0.988 | -0.173 | 0.264 | -9.547  |
| 1381018_a_at | 0.811          | 0.999 | 0.190  | 0.256 | -6.738  |
| 1382106_at   | 0.811          | 1.068 | -0.412 | 0.259 | -5.081  |

**Table S1.** Estimated parameters and regression coefficient values for the sinusoidal curve  $A\sin(Bt+C)+\text{mean}$  for individual probe sets mined for circadian oscillations in expression

| Probe set ID | R <sup>2</sup> | Mean  | A      | B     | C       |
|--------------|----------------|-------|--------|-------|---------|
| 1383597_at   | 0.811          | 0.980 | 0.147  | 0.255 | -8.604  |
| 1388662_at   | 0.811          | 1.008 | -0.149 | 0.263 | -5.450  |
| 1395557_at   | 0.811          | 0.955 | -0.462 | 0.254 | -5.228  |
| 1398051_at   | 0.811          | 1.016 | -0.266 | 0.256 | -5.283  |
| 1398131_at   | 0.811          | 1.050 | -0.443 | 0.264 | -8.997  |
| 1372100_at   | 0.81           | 0.991 | -0.102 | 0.258 | -8.974  |
| 1373683_at   | 0.81           | 0.996 | 0.128  | 0.263 | -6.911  |
| 1375562_at   | 0.81           | 1.028 | -0.237 | 0.265 | -6.142  |
| 1380937_at   | 0.81           | 0.972 | 0.172  | 0.256 | -7.723  |
| 1387109_at   | 0.81           | 1.070 | -0.309 | 0.275 | -5.562  |
| 1388111_at   | 0.81           | 1.143 | -0.669 | 0.248 | -8.593  |
| 1389021_at   | 0.81           | 0.998 | 0.074  | 0.256 | -10.990 |
| 1390489_at   | 0.81           | 1.017 | -0.187 | 0.269 | -9.692  |
| 1391325_at   | 0.81           | 1.037 | -0.221 | 0.264 | -3.895  |
| 1393632_at   | 0.81           | 1.051 | -0.219 | 0.264 | -4.450  |
| 1380636_at   | 0.809          | 1.006 | -0.314 | 0.252 | -8.232  |
| 1384871_at   | 0.809          | 1.102 | -0.379 | 0.258 | -5.214  |
| 1390841_at   | 0.809          | 0.984 | 0.160  | 0.261 | -11.659 |
| 1368073_at   | 0.808          | 0.990 | 0.115  | 0.265 | -11.821 |
| 1376265_at   | 0.808          | 1.035 | -0.285 | 0.268 | -5.769  |
| 1383919_at   | 0.808          | 0.990 | 0.166  | 0.260 | -6.895  |
| 1384605_at   | 0.808          | 0.990 | -0.185 | 0.258 | -9.535  |
| 1390141_at   | 0.808          | 1.026 | -0.333 | 0.266 | -5.468  |
| 1395275_at   | 0.808          | 0.998 | 0.153  | 0.258 | -7.668  |
| 1372772_at   | 0.807          | 1.013 | -0.154 | 0.259 | -9.228  |
| 1381311_at   | 0.807          | 1.004 | -0.317 | 0.259 | -9.072  |
| 1383806_at   | 0.807          | 1.027 | -0.153 | 0.252 | -8.703  |
| 1389017_at   | 0.807          | 0.998 | -0.103 | 0.254 | -9.127  |
| 1389287_at   | 0.807          | 1.009 | -0.111 | 0.267 | -9.721  |
| 1390151_at   | 0.807          | 0.998 | -0.140 | 0.263 | -9.213  |
| 1390441_at   | 0.807          | 1.027 | -0.188 | 0.272 | -4.411  |
| 1393197_at   | 0.807          | 1.026 | 0.189  | 0.254 | -10.932 |
| 1372162_at   | 0.806          | 1.037 | 0.212  | 0.258 | -11.682 |
| 1373507_at   | 0.806          | 0.991 | 0.119  | 0.267 | -12.260 |
| 1374509_at   | 0.806          | 1.000 | -0.118 | 0.255 | -9.372  |
| 1376581_at   | 0.806          | 0.986 | -0.196 | 0.267 | -9.375  |
| 1389496_at   | 0.806          | 1.026 | -0.261 | 0.264 | -9.322  |
| 1391187_at   | 0.806          | 1.056 | -0.269 | 0.268 | -5.772  |
| 1392316_at   | 0.806          | 1.004 | -0.142 | 0.261 | -4.947  |
| 1370642_s_at | 0.805          | 1.081 | -0.351 | 0.248 | -8.484  |

**Table S1.** Estimated parameters and regression coefficient values for the sinusoidal curve  $A\sin(Bt+C)+\text{mean}$  for individual probe sets mined for circadian oscillations in expression

| Probe set ID | R <sup>2</sup> | Mean  | A      | B     | C       |
|--------------|----------------|-------|--------|-------|---------|
| 1371785_at   | 0.805          | 1.014 | -0.272 | 0.258 | -7.081  |
| 1379436_a_at | 0.805          | 1.011 | -0.263 | 0.254 | -8.582  |
| 1383189_at   | 0.805          | 0.970 | -0.306 | 0.261 | -9.132  |
| 1385132_at   | 0.805          | 1.019 | -0.163 | 0.258 | -6.081  |
| 1394467_at   | 0.805          | 0.927 | -0.375 | 0.259 | -5.385  |
| 1397624_at   | 0.805          | 0.999 | -0.108 | 0.265 | -9.829  |
| 1367478_at   | 0.804          | 1.004 | -0.150 | 0.261 | -9.629  |
| 1373282_at   | 0.804          | 1.031 | -0.322 | 0.271 | -5.287  |
| 1374539_at   | 0.804          | 1.009 | -0.128 | 0.264 | -8.640  |
| 1375450_at   | 0.804          | 1.006 | 0.092  | 0.262 | -6.340  |
| 1389651_at   | 0.804          | 1.041 | -0.261 | 0.255 | -8.887  |
| 1391077_at   | 0.804          | 0.949 | -0.220 | 0.266 | -8.387  |
| 1393060_at   | 0.804          | 1.021 | -0.240 | 0.268 | -6.991  |
| 1368223_at   | 0.803          | 1.015 | -0.168 | 0.263 | -4.767  |
| 1373047_at   | 0.803          | 1.008 | -0.169 | 0.259 | -9.546  |
| 1374322_at   | 0.803          | 1.001 | 0.091  | 0.260 | -6.417  |
| 1376957_at   | 0.803          | 0.976 | -0.168 | 0.253 | -9.107  |
| 1377492_at   | 0.803          | 1.433 | -0.931 | 0.274 | -4.974  |
| 1379137_at   | 0.803          | 0.932 | -0.201 | 0.267 | -5.326  |
| 1382252_at   | 0.803          | 1.015 | -0.163 | 0.266 | -9.492  |
| 1383651_a_at | 0.803          | 0.992 | -0.124 | 0.267 | -9.408  |
| 1383894_at   | 0.803          | 1.004 | 0.073  | 0.263 | -8.087  |
| 1385158_at   | 0.803          | 1.002 | 0.171  | 0.269 | -6.875  |
| 1385973_at   | 0.803          | 1.825 | -2.309 | 0.267 | -5.681  |
| 1387658_at   | 0.803          | 1.041 | -0.187 | 0.270 | -5.003  |
| 1389395_at   | 0.803          | 0.980 | -0.240 | 0.256 | -8.918  |
| 1392613_at   | 0.803          | 1.407 | -1.352 | 0.267 | -5.465  |
| 1372935_at   | 0.802          | 0.987 | 0.185  | 0.253 | -11.395 |
| 1373092_at   | 0.802          | 1.014 | 0.157  | 0.265 | -7.996  |
| 1385961_at   | 0.802          | 0.982 | -0.277 | 0.255 | -5.159  |
| 1379085_at   | 0.801          | 0.999 | 0.169  | 0.257 | -7.044  |
| 1379627_at   | 0.801          | 0.992 | -0.131 | 0.254 | -4.874  |
| 1391474_at   | 0.801          | 0.992 | -0.133 | 0.264 | -9.254  |
| 1393898_at   | 0.801          | 0.998 | -0.420 | 0.262 | -3.562  |
| 1398582_at   | 0.801          | 0.966 | -0.216 | 0.255 | -5.006  |
| 1367939_at   | 0.8            | 1.004 | -0.197 | 0.256 | -9.169  |
| 1374251_at   | 0.8            | 1.033 | -0.250 | 0.267 | -5.936  |
| 1377148_at   | 0.8            | 1.064 | -0.485 | 0.254 | -4.942  |
| 1381043_at   | 0.8            | 1.039 | -0.210 | 0.253 | -8.819  |
| 1381611_at   | 0.8            | 1.019 | -0.123 | 0.261 | -5.732  |

**Table S1.** Estimated parameters and regression coefficient values for the sinusoidal curve  $A\sin(Bt+C)+\text{mean}$  for individual probe sets mined for circadian oscillations in expression

| Probe set ID | R <sup>2</sup> | Mean  | A      | B     | C       |
|--------------|----------------|-------|--------|-------|---------|
| 1383169_at   | 0.8            | 0.981 | 0.094  | 0.258 | -8.162  |
| 1392640_at   | 0.8            | 0.927 | -0.413 | 0.266 | -6.946  |
| 1368549_at   | 0.799          | 1.008 | 0.086  | 0.259 | -7.371  |
| 1370975_at   | 0.799          | 0.990 | -0.103 | 0.254 | -8.780  |
| 1371890_at   | 0.799          | 1.012 | 0.144  | 0.268 | -7.959  |
| 1379397_at   | 0.799          | 1.005 | -0.264 | 0.257 | -5.288  |
| 1382266_at   | 0.799          | 1.056 | -0.250 | 0.269 | -4.286  |
| 1382474_at   | 0.799          | 1.009 | -0.133 | 0.265 | -9.702  |
| 1384756_at   | 0.799          | 0.998 | -0.219 | 0.258 | -5.027  |
| 1393813_at   | 0.799          | 0.983 | -0.297 | 0.251 | -5.011  |
| 1371014_at   | 0.798          | 1.059 | -0.459 | 0.260 | -3.289  |
| 1371429_at   | 0.798          | 0.984 | -0.164 | 0.249 | -9.006  |
| 1371516_at   | 0.798          | 0.986 | 0.087  | 0.256 | -11.770 |
| 1383452_at   | 0.798          | 0.984 | -0.099 | 0.256 | -9.552  |
| 1385798_at   | 0.798          | 1.019 | -0.303 | 0.270 | -9.278  |
| 1385851_at   | 0.798          | 1.009 | -0.184 | 0.252 | -8.976  |
| 1387205_at   | 0.798          | 1.015 | 0.149  | 0.261 | -11.508 |
| 1391002_at   | 0.798          | 0.989 | -0.177 | 0.267 | -5.638  |
| 1384355_at   | 0.797          | 1.048 | -0.273 | 0.257 | -5.612  |
| 1393309_at   | 0.797          | 0.998 | -0.130 | 0.259 | -9.385  |
| 1372463_at   | 0.796          | 1.005 | 0.086  | 0.268 | -6.557  |
| 1375067_at   | 0.796          | 0.995 | -0.112 | 0.262 | -9.241  |
| 1379258_at   | 0.796          | 1.010 | 0.126  | 0.263 | -6.270  |
| 1380638_at   | 0.796          | 1.014 | -0.236 | 0.261 | -5.777  |
| 1393917_at   | 0.796          | 1.041 | -0.483 | 0.265 | -6.201  |
| 1394766_at   | 0.796          | 1.002 | -0.352 | 0.258 | -3.838  |
| 1399004_at   | 0.796          | 0.998 | 0.086  | 0.257 | -6.161  |
| 1368538_at   | 0.795          | 1.002 | -0.195 | 0.260 | -9.646  |
| 1370964_at   | 0.795          | 1.061 | -0.259 | 0.259 | -7.910  |
| 1373399_at   | 0.795          | 1.029 | -0.208 | 0.250 | -8.786  |
| 1374029_at   | 0.795          | 1.006 | 0.198  | 0.255 | -11.219 |
| 1379482_at   | 0.795          | 0.998 | 0.096  | 0.270 | -11.799 |
| 1383064_at   | 0.795          | 0.998 | -0.207 | 0.258 | -9.260  |
| 1383494_at   | 0.795          | 1.018 | -0.226 | 0.257 | -9.233  |
| 1388446_at   | 0.795          | 0.998 | -0.115 | 0.258 | -9.643  |
| 1389587_at   | 0.795          | 1.032 | 0.116  | 0.261 | -10.804 |
| 1391255_at   | 0.795          | 0.974 | -0.243 | 0.257 | -8.928  |
| 1395826_at   | 0.795          | 1.006 | 0.166  | 0.256 | -7.875  |
| 1398797_at   | 0.795          | 1.027 | 0.098  | 0.267 | -6.926  |
| 1376632_at   | 0.794          | 0.998 | 0.198  | 0.260 | -11.685 |

**Table S1.** Estimated parameters and regression coefficient values for the sinusoidal curve  $A\sin(Bt+C)+\text{mean}$  for individual probe sets mined for circadian oscillations in expression

| Probe set ID | R <sup>2</sup> | Mean  | A      | B     | C       |
|--------------|----------------|-------|--------|-------|---------|
| 1381058_at   | 0.794          | 1.038 | 0.213  | 0.266 | -6.911  |
| 1386145_at   | 0.794          | 1.052 | 0.224  | 0.267 | -6.733  |
| 1395536_at   | 0.794          | 1.024 | -0.205 | 0.259 | -9.205  |
| 1397070_at   | 0.794          | 1.005 | -0.245 | 0.270 | -6.080  |
| 1398988_at   | 0.794          | 0.999 | -0.139 | 0.265 | -9.574  |
| 1368792_at   | 0.793          | 1.052 | -0.325 | 0.258 | -5.725  |
| 1374209_at   | 0.793          | 1.008 | 0.076  | 0.262 | -6.184  |
| 1378131_at   | 0.793          | 1.019 | -0.160 | 0.261 | -9.438  |
| 1379112_at   | 0.793          | 1.008 | -0.432 | 0.259 | -5.288  |
| 1379361_at   | 0.793          | 1.018 | -0.211 | 0.271 | -8.430  |
| 1383246_at   | 0.793          | 1.003 | -0.102 | 0.260 | -9.088  |
| 1389319_at   | 0.793          | 1.022 | 0.179  | 0.256 | -11.350 |
| 1367900_at   | 0.792          | 1.021 | 0.146  | 0.257 | -6.573  |
| 1372154_at   | 0.792          | 1.020 | -0.130 | 0.254 | -8.183  |
| 1373024_at   | 0.792          | 1.022 | 0.107  | 0.256 | -11.420 |
| 1376009_at   | 0.792          | 1.006 | -0.366 | 0.257 | -5.495  |
| 1377407_at   | 0.792          | 1.215 | -0.593 | 0.260 | -8.268  |
| 1379141_at   | 0.792          | 1.023 | -0.509 | 0.262 | -5.394  |
| 1382328_at   | 0.792          | 1.019 | -0.366 | 0.260 | -9.165  |
| 1387343_at   | 0.792          | 1.050 | -0.380 | 0.272 | -5.646  |
| 1391131_at   | 0.792          | 1.043 | -0.283 | 0.262 | -9.333  |
| 1370099_at   | 0.791          | 0.992 | 0.151  | 0.257 | -7.638  |
| 1370920_at   | 0.791          | 1.046 | 0.139  | 0.268 | -7.023  |
| 1371978_at   | 0.791          | 0.981 | -0.117 | 0.260 | -8.947  |
| 1372059_at   | 0.791          | 0.994 | 0.180  | 0.265 | -6.699  |
| 1373651_at   | 0.791          | 0.975 | -0.194 | 0.267 | -15.514 |
| 1380611_at   | 0.791          | 1.112 | -0.589 | 0.267 | -5.612  |
| 1391122_at   | 0.791          | 1.063 | -0.386 | 0.264 | -8.759  |
| 1372621_at   | 0.79           | 1.010 | -0.146 | 0.251 | -9.051  |
| 1377576_at   | 0.79           | 1.000 | 0.099  | 0.264 | -6.233  |
| 1378814_at   | 0.79           | 0.981 | -0.133 | 0.257 | -9.709  |
| 1379449_at   | 0.79           | 1.007 | 0.093  | 0.255 | -7.220  |
| 1392900_at   | 0.79           | 1.027 | -0.102 | 0.259 | -8.837  |
| 1393025_at   | 0.79           | 1.033 | 0.267  | 0.266 | -6.731  |
| 1395318_at   | 0.79           | 0.987 | -0.299 | 0.259 | -5.306  |
| 1395859_at   | 0.79           | 0.972 | 0.158  | 0.263 | -8.058  |
| 1398514_at   | 0.79           | 0.996 | -0.492 | 0.271 | -8.658  |
| 1374406_at   | 0.789          | 1.009 | -0.092 | 0.249 | -8.610  |
| 1382439_at   | 0.789          | 1.033 | 0.259  | 0.269 | -12.139 |
| 1385529_at   | 0.789          | 0.972 | -0.319 | 0.261 | -8.768  |



**Table S1.** Estimated parameters and regression coefficient values for the sinusoidal curve  $A\sin(Bt+C)+\text{mean}$  for individual probe sets mined for circadian oscillations in expression

| Probe set ID | R <sup>2</sup> | Mean  | A      | B     | C       |
|--------------|----------------|-------|--------|-------|---------|
| 1385620_at   | 0.789          | 0.969 | -0.370 | 0.261 | -6.830  |
| 1389089_at   | 0.789          | 0.966 | -0.166 | 0.258 | -9.182  |
| 1397266_at   | 0.789          | 1.008 | -0.294 | 0.266 | -3.829  |
| 1399157_at   | 0.789          | 0.977 | -0.140 | 0.254 | -9.370  |
| 1370941_at   | 0.788          | 1.030 | -0.161 | 0.259 | -7.440  |
| 1372480_at   | 0.788          | 1.000 | -0.303 | 0.264 | -8.858  |
| 1374717_at   | 0.788          | 1.025 | -0.188 | 0.263 | -9.584  |
| 1375523_at   | 0.788          | 1.014 | -0.158 | 0.265 | -9.714  |
| 1378181_at   | 0.788          | 1.004 | -0.145 | 0.251 | -8.609  |
| 1383496_at   | 0.788          | 1.002 | 0.100  | 0.258 | -8.015  |
| 1385393_at   | 0.788          | 0.989 | -0.291 | 0.255 | -4.966  |
| 1385783_at   | 0.788          | 1.045 | -0.182 | 0.265 | -4.832  |
| 1395994_at   | 0.788          | 1.011 | -0.150 | 0.270 | -15.675 |
| 1372234_at   | 0.787          | 1.009 | 0.091  | 0.259 | -11.866 |
| 1374106_at   | 0.787          | 1.002 | -0.268 | 0.266 | -9.450  |
| 1376862_at   | 0.787          | 0.978 | -0.136 | 0.254 | -9.260  |
| 1388802_at   | 0.787          | 1.012 | -0.152 | 0.249 | -9.155  |
| 1398522_at   | 0.787          | 1.003 | 0.195  | 0.253 | -8.062  |
| 1371875_at   | 0.786          | 0.997 | 0.091  | 0.256 | -6.086  |
| 1377060_at   | 0.786          | 1.024 | 0.123  | 0.256 | -6.999  |
| 1379550_a_at | 0.786          | 0.997 | -0.126 | 0.262 | -9.105  |
| 1381535_at   | 0.786          | 1.003 | 0.179  | 0.265 | -6.725  |
| 1388556_at   | 0.786          | 0.998 | -0.109 | 0.253 | -8.601  |
| 1388688_at   | 0.786          | 0.993 | -0.126 | 0.254 | -8.726  |
| 1389102_at   | 0.786          | 0.993 | 0.083  | 0.268 | -6.642  |
| 1373240_at   | 0.785          | 1.001 | 0.124  | 0.255 | -11.206 |
| 1376214_at   | 0.785          | 0.982 | -0.129 | 0.261 | -8.275  |
| 1377454_at   | 0.785          | 0.950 | -0.238 | 0.263 | -9.164  |
| 1378805_at   | 0.785          | 1.062 | -0.495 | 0.261 | -6.742  |
| 1381491_at   | 0.785          | 1.038 | -0.209 | 0.258 | -9.070  |
| 1384081_at   | 0.785          | 1.392 | -1.087 | 0.273 | -5.385  |
| 1392157_at   | 0.785          | 1.028 | -0.234 | 0.262 | -5.985  |
| 1394039_at   | 0.785          | 1.011 | 0.178  | 0.260 | -8.372  |
| 1394834_at   | 0.785          | 1.173 | -0.468 | 0.259 | -4.988  |
| 1396773_at   | 0.785          | 1.012 | 0.138  | 0.265 | -7.774  |
| 1371202_a_at | 0.784          | 0.981 | 0.153  | 0.254 | -7.930  |
| 1372346_at   | 0.784          | 0.981 | -0.154 | 0.256 | -9.375  |
| 1376813_at   | 0.784          | 0.978 | 0.199  | 0.267 | -11.873 |
| 1380376_at   | 0.784          | 0.988 | 0.083  | 0.258 | -7.678  |
| 1380726_at   | 0.784          | 1.061 | -0.437 | 0.251 | -5.930  |

**Table S1.** Estimated parameters and regression coefficient values for the sinusoidal curve  $A\sin(Bt+C)+\text{mean}$  for individual probe sets mined for circadian oscillations in expression

| Probe set ID | R <sup>2</sup> | Mean  | A      | B     | C       |
|--------------|----------------|-------|--------|-------|---------|
| 1382742_at   | 0.784          | 1.056 | -0.256 | 0.270 | -5.406  |
| 1383726_at   | 0.784          | 1.027 | -0.243 | 0.257 | -5.268  |
| 1385093_at   | 0.784          | 1.030 | 0.202  | 0.250 | -11.364 |
| 1389688_at   | 0.784          | 1.025 | -0.191 | 0.258 | -7.174  |
| 1390127_at   | 0.784          | 0.989 | -0.126 | 0.265 | -4.935  |
| 1390523_at   | 0.784          | 0.978 | 0.236  | 0.268 | -6.905  |
| 1391065_at   | 0.784          | 0.987 | -0.230 | 0.259 | -5.043  |
| 1392652_at   | 0.784          | 1.006 | -0.279 | 0.262 | -5.216  |
| 1397820_at   | 0.784          | 0.957 | -0.296 | 0.259 | -5.578  |
| 1368228_at   | 0.783          | 0.987 | -0.106 | 0.260 | -9.252  |
| 1369637_at   | 0.783          | 1.038 | 0.171  | 0.251 | -11.133 |
| 1380737_at   | 0.783          | 0.997 | 0.172  | 0.261 | -11.689 |
| 1380811_at   | 0.783          | 1.015 | -0.158 | 0.271 | -9.766  |
| 1383103_at   | 0.783          | 1.007 | 0.089  | 0.265 | -7.219  |
| 1383348_at   | 0.783          | 0.987 | -0.140 | 0.259 | -9.399  |
| 1372742_at   | 0.782          | 0.989 | -0.123 | 0.255 | -9.249  |
| 1373829_at   | 0.782          | 1.038 | 0.250  | 0.263 | -6.587  |
| 1377917_at   | 0.782          | 1.004 | -0.090 | 0.255 | -7.215  |
| 1379422_at   | 0.782          | 1.010 | -0.164 | 0.263 | -9.618  |
| 1379626_at   | 0.782          | 1.010 | -0.171 | 0.266 | -9.374  |
| 1389867_at   | 0.782          | 1.015 | -0.148 | 0.255 | -9.076  |
| 1367902_at   | 0.781          | 1.009 | -0.133 | 0.258 | -8.963  |
| 1368120_at   | 0.781          | 0.992 | -0.216 | 0.257 | -4.013  |
| 1369638_at   | 0.781          | 1.038 | 0.219  | 0.267 | -8.608  |
| 1373641_at   | 0.781          | 0.985 | 0.160  | 0.255 | -11.025 |
| 1376379_a_at | 0.781          | 1.023 | 0.118  | 0.254 | -11.367 |
| 1379439_at   | 0.781          | 0.996 | 0.083  | 0.262 | -6.361  |
| 1389656_at   | 0.781          | 1.012 | -0.138 | 0.259 | -15.408 |
| 1368928_at   | 0.78           | 1.105 | -0.394 | 0.248 | -8.257  |
| 1375645_at   | 0.78           | 0.984 | 0.162  | 0.261 | -11.046 |
| 1380365_at   | 0.78           | 1.064 | -0.234 | 0.263 | -5.194  |
| 1383115_at   | 0.78           | 1.007 | -0.121 | 0.253 | -8.984  |
| 1387058_at   | 0.78           | 1.001 | 0.205  | 0.264 | -11.869 |
| 1390274_at   | 0.78           | 0.990 | -0.160 | 0.266 | -6.218  |
| 1390585_at   | 0.78           | 1.039 | -0.437 | 0.259 | -9.019  |
| 1397535_at   | 0.78           | 0.996 | -0.126 | 0.258 | -4.709  |
| 1398662_at   | 0.78           | 0.995 | -0.179 | 0.276 | -6.049  |
| 1369076_at   | 0.779          | 1.018 | -0.178 | 0.257 | -7.396  |
| 1370089_at   | 0.779          | 1.041 | -0.513 | 0.254 | -4.945  |
| 1370927_at   | 0.779          | 1.035 | 0.214  | 0.260 | -10.807 |

**Table S1.** Estimated parameters and regression coefficient values for the sinusoidal curve  $A\sin(Bt+C)+\text{mean}$  for individual probe sets mined for circadian oscillations in expression

| Probe set ID | R <sup>2</sup> | Mean  | A      | B     | C       |
|--------------|----------------|-------|--------|-------|---------|
| 1373403_at   | 0.779          | 0.994 | -0.171 | 0.276 | -5.667  |
| 1374531_at   | 0.779          | 1.032 | -0.127 | 0.275 | -5.243  |
| 1379477_at   | 0.779          | 0.995 | -0.236 | 0.267 | -6.273  |
| 1388892_at   | 0.779          | 0.999 | -0.107 | 0.261 | -9.069  |
| 1393843_at   | 0.779          | 1.018 | -0.264 | 0.264 | -9.510  |
| 1397944_at   | 0.779          | 1.010 | 0.189  | 0.261 | -11.234 |
| 1372213_at   | 0.778          | 1.070 | -0.362 | 0.272 | -5.711  |
| 1373616_at   | 0.778          | 0.996 | 0.052  | 0.258 | -6.331  |
| 1374505_at   | 0.778          | 1.009 | 0.199  | 0.262 | -6.827  |
| 1374529_at   | 0.778          | 1.046 | -0.271 | 0.256 | -7.546  |
| 1376341_at   | 0.778          | 1.045 | -0.238 | 0.269 | -4.795  |
| 1382390_at   | 0.778          | 1.005 | -0.135 | 0.263 | -9.619  |
| 1383152_at   | 0.778          | 1.018 | -0.129 | 0.255 | -7.987  |
| 1383447_at   | 0.778          | 0.967 | 0.204  | 0.259 | -6.534  |
| 1393334_at   | 0.778          | 1.014 | 0.088  | 0.265 | -6.935  |
| 1395413_at   | 0.778          | 0.966 | -0.292 | 0.256 | -5.194  |
| 1392553_at   | 0.777          | 1.025 | -0.195 | 0.274 | -7.245  |
| 1393672_at   | 0.777          | 0.981 | -0.228 | 0.265 | -9.684  |
| 1381786_at   | 0.776          | 1.044 | -0.552 | 0.254 | -5.274  |
| 1390159_at   | 0.776          | 1.018 | -0.212 | 0.249 | -8.737  |
| 1390171_at   | 0.776          | 1.084 | -0.240 | 0.275 | -5.020  |
| 1393000_at   | 0.776          | 0.979 | -0.223 | 0.264 | -9.448  |
| 1371730_at   | 0.775          | 1.014 | -0.100 | 0.264 | -9.793  |
| 1373847_at   | 0.775          | 0.973 | 0.186  | 0.263 | -10.930 |
| 1387808_at   | 0.775          | 1.013 | 0.187  | 0.268 | -11.696 |
| 1388855_at   | 0.775          | 1.008 | -0.106 | 0.255 | -9.371  |
| 1392838_at   | 0.775          | 0.952 | -0.332 | 0.255 | -5.290  |
| 1395246_at   | 0.775          | 0.923 | -0.262 | 0.249 | -5.158  |
| 1398635_at   | 0.775          | 1.010 | -0.279 | 0.266 | -5.819  |
| 1370304_at   | 0.774          | 1.017 | -0.087 | 0.249 | -8.522  |
| 1371091_at   | 0.774          | 1.001 | -0.171 | 0.263 | -5.408  |
| 1380926_at   | 0.774          | 0.967 | -0.334 | 0.260 | -5.396  |
| 1383247_a_at | 0.774          | 0.979 | -0.145 | 0.249 | -9.017  |
| 1390638_at   | 0.774          | 0.938 | -0.223 | 0.262 | -9.314  |
| 1392490_at   | 0.774          | 0.978 | 0.126  | 0.255 | -8.148  |
| 1398245_at   | 0.774          | 0.994 | -0.437 | 0.262 | -6.497  |
| 1399130_at   | 0.774          | 1.001 | -0.121 | 0.256 | -8.762  |
| 1370516_at   | 0.773          | 1.039 | -0.235 | 0.251 | -8.698  |
| 1372298_at   | 0.773          | 1.028 | -0.113 | 0.262 | -7.419  |
| 1373592_at   | 0.773          | 1.000 | 0.165  | 0.261 | -6.669  |

**Table S1.** Estimated parameters and regression coefficient values for the sinusoidal curve  $A\sin(Bt+C)+\text{mean}$  for individual probe sets mined for circadian oscillations in expression

| Probe set ID | R <sup>2</sup> | Mean  | A      | B     | C       |
|--------------|----------------|-------|--------|-------|---------|
| 1375163_at   | 0.773          | 1.002 | -0.123 | 0.253 | -8.876  |
| 1375649_at   | 0.773          | 1.043 | -0.255 | 0.258 | -9.027  |
| 1388032_a_at | 0.773          | 1.169 | -0.521 | 0.250 | -8.046  |
| 1388331_at   | 0.773          | 0.988 | -0.144 | 0.274 | -7.683  |
| 1390187_at   | 0.773          | 0.992 | 0.089  | 0.257 | -6.469  |
| 1391507_at   | 0.773          | 0.997 | 0.124  | 0.265 | -8.685  |
| 1392504_at   | 0.773          | 1.050 | -0.316 | 0.256 | -5.570  |
| 1397343_at   | 0.773          | 1.009 | -0.166 | 0.257 | -8.814  |
| 1368347_at   | 0.772          | 0.961 | 0.396  | 0.263 | -6.214  |
| 1372704_at   | 0.772          | 1.001 | -0.151 | 0.267 | -7.688  |
| 1373068_at   | 0.772          | 1.023 | -0.175 | 0.274 | -4.965  |
| 1376160_at   | 0.772          | 1.078 | -0.225 | 0.252 | -8.008  |
| 1376974_at   | 0.772          | 1.031 | 0.212  | 0.251 | -11.075 |
| 1383224_at   | 0.772          | 1.026 | 0.175  | 0.256 | -6.617  |
| 1388583_at   | 0.772          | 0.983 | -0.236 | 0.258 | -8.965  |
| 1389780_at   | 0.772          | 1.065 | -0.327 | 0.270 | -3.749  |
| 1398771_at   | 0.772          | 1.001 | 0.114  | 0.263 | -11.714 |
| 1368829_at   | 0.771          | 0.999 | -0.216 | 0.262 | -9.429  |
| 1371868_at   | 0.771          | 1.012 | -0.119 | 0.260 | -9.629  |
| 1373595_at   | 0.771          | 1.003 | 0.125  | 0.258 | -10.766 |
| 1393863_at   | 0.771          | 0.998 | 0.359  | 0.252 | -6.004  |
| 1371666_at   | 0.77           | 0.989 | 0.094  | 0.254 | -5.960  |
| 1374139_at   | 0.77           | 1.010 | -0.152 | 0.268 | -5.936  |
| 1378540_at   | 0.77           | 0.995 | 0.133  | 0.252 | -6.896  |
| 1379461_at   | 0.77           | 0.985 | 0.111  | 0.254 | -7.632  |
| 1382809_at   | 0.77           | 1.140 | -0.637 | 0.267 | -3.658  |
| 1390221_at   | 0.77           | 0.986 | -0.130 | 0.261 | -9.008  |
| 1390743_at   | 0.77           | 1.002 | -0.194 | 0.250 | -8.859  |
| 1390831_at   | 0.77           | 0.984 | 0.089  | 0.260 | -7.761  |
| 1394524_at   | 0.77           | 0.976 | 0.137  | 0.252 | -11.203 |
| 1399150_at   | 0.77           | 1.009 | 0.090  | 0.264 | -7.602  |
| 1372721_at   | 0.769          | 0.998 | 0.097  | 0.264 | -11.612 |
| 1373017_at   | 0.769          | 1.012 | -0.106 | 0.265 | -9.827  |
| 1373310_at   | 0.769          | 0.994 | -0.169 | 0.270 | -6.576  |
| 1373842_at   | 0.769          | 1.009 | 0.075  | 0.268 | -8.000  |
| 1376646_at   | 0.769          | 1.025 | 0.171  | 0.257 | -11.172 |
| 1378544_at   | 0.769          | 1.000 | -0.480 | 0.258 | -5.277  |
| 1379688_at   | 0.769          | 0.990 | -0.187 | 0.260 | -9.321  |
| 1383316_at   | 0.769          | 1.015 | -0.152 | 0.252 | -9.167  |
| 1388519_at   | 0.769          | 1.013 | 0.078  | 0.268 | -11.254 |

**Table S1.** Estimated parameters and regression coefficient values for the sinusoidal curve  $A\sin(Bt+C)+\text{mean}$  for individual probe sets mined for circadian oscillations in expression

| Probe set ID | R <sup>2</sup> | Mean  | A      | B     | C       |
|--------------|----------------|-------|--------|-------|---------|
| 1388678_at   | 0.769          | 1.005 | -0.077 | 0.260 | -8.869  |
| 1391208_at   | 0.769          | 0.832 | -0.454 | 0.263 | -6.013  |
| 1398340_at   | 0.769          | 1.005 | -0.118 | 0.254 | -8.986  |
| 1398356_at   | 0.769          | 0.990 | -0.129 | 0.252 | -9.095  |
| 1371634_at   | 0.768          | 0.986 | -0.130 | 0.262 | -9.039  |
| 1372056_at   | 0.768          | 0.997 | -0.114 | 0.269 | -9.364  |
| 1374156_at   | 0.768          | 1.007 | 0.101  | 0.255 | -7.322  |
| 1375546_at   | 0.768          | 0.993 | 0.124  | 0.251 | -11.301 |
| 1378291_at   | 0.768          | 1.008 | -0.127 | 0.260 | -9.483  |
| 1379669_at   | 0.768          | 1.029 | -0.173 | 0.261 | -8.940  |
| 1382152_at   | 0.768          | 1.006 | -0.200 | 0.259 | -9.368  |
| 1382294_at   | 0.768          | 0.973 | -0.166 | 0.256 | -5.191  |
| 1387459_at   | 0.768          | 1.056 | -0.334 | 0.263 | -8.455  |
| 1389646_at   | 0.768          | 0.999 | -0.106 | 0.266 | -9.302  |
| 1393909_at   | 0.768          | 1.042 | -0.284 | 0.256 | -5.563  |
| 1398874_at   | 0.768          | 0.994 | 0.097  | 0.263 | -6.309  |
| 1367513_at   | 0.767          | 1.015 | -0.110 | 0.246 | -8.601  |
| 1369971_a_at | 0.767          | 1.017 | -0.209 | 0.256 | -9.311  |
| 1375011_at   | 0.767          | 1.024 | 0.145  | 0.261 | -6.688  |
| 1378252_at   | 0.767          | 1.029 | -0.342 | 0.270 | -6.635  |
| 1379375_at   | 0.767          | 0.988 | -0.133 | 0.256 | -9.335  |
| 1383805_at   | 0.767          | 1.000 | -0.235 | 0.257 | -9.169  |
| 1388618_at   | 0.767          | 1.017 | -0.104 | 0.254 | -8.797  |
| 1388817_at   | 0.767          | 0.997 | -0.122 | 0.255 | -9.328  |
| 1392618_at   | 0.767          | 0.982 | -0.126 | 0.256 | -9.661  |
| 1393626_at   | 0.767          | 1.015 | 0.194  | 0.268 | -6.891  |
| 1369754_a_at | 0.766          | 0.969 | -0.228 | 0.259 | -5.615  |
| 1370843_at   | 0.766          | 1.061 | -0.267 | 0.246 | -8.399  |
| 1371614_at   | 0.766          | 1.004 | 0.091  | 0.260 | -6.241  |
| 1375965_at   | 0.766          | 0.988 | 0.108  | 0.257 | -7.776  |
| 1380810_at   | 0.766          | 1.003 | 0.131  | 0.261 | -6.740  |
| 1367498_at   | 0.765          | 0.990 | 0.081  | 0.263 | -8.272  |
| 1368428_at   | 0.765          | 1.006 | -0.148 | 0.254 | -15.276 |
| 1369092_at   | 0.765          | 1.005 | -0.185 | 0.260 | -9.159  |
| 1372309_at   | 0.765          | 1.000 | 0.102  | 0.262 | -7.493  |
| 1373248_at   | 0.765          | 0.989 | -0.161 | 0.259 | -9.359  |
| 1375438_at   | 0.765          | 1.017 | -0.123 | 0.252 | -8.624  |
| 1378197_at   | 0.765          | 0.991 | 0.171  | 0.252 | -11.328 |
| 1379382_at   | 0.765          | 0.996 | 0.085  | 0.258 | -6.710  |
| 1380639_at   | 0.765          | 0.974 | -0.134 | 0.261 | -8.985  |

**Table S1.** Estimated parameters and regression coefficient values for the sinusoidal curve  $A\sin(Bt+C)+\text{mean}$  for individual probe sets mined for circadian oscillations in expression

| Probe set ID | R <sup>2</sup> | Mean  | A      | B     | C       |
|--------------|----------------|-------|--------|-------|---------|
| 1381165_at   | 0.765          | 0.970 | -0.273 | 0.257 | -5.108  |
| 1381316_at   | 0.765          | 1.015 | -0.227 | 0.257 | -9.262  |
| 1382632_at   | 0.765          | 0.990 | -0.263 | 0.263 | -5.382  |
| 1388512_at   | 0.765          | 1.022 | 0.165  | 0.250 | -11.346 |
| 1391561_at   | 0.765          | 0.981 | -0.234 | 0.256 | -5.283  |
| 1398553_at   | 0.765          | 0.965 | -0.265 | 0.255 | -5.246  |
| 1370281_at   | 0.764          | 1.012 | 0.206  | 0.252 | -11.349 |
| 1371362_at   | 0.764          | 0.993 | 0.077  | 0.257 | -5.880  |
| 1375733_at   | 0.764          | 1.025 | 0.157  | 0.261 | -11.123 |
| 1382647_at   | 0.764          | 1.015 | 0.210  | 0.268 | -6.820  |
| 1382820_at   | 0.764          | 1.021 | -0.198 | 0.261 | -9.610  |
| 1388178_at   | 0.764          | 1.034 | -0.201 | 0.255 | -5.497  |
| 1388538_at   | 0.764          | 0.998 | -0.047 | 0.255 | -8.815  |
| 1397217_at   | 0.764          | 1.019 | -0.104 | 0.252 | -8.787  |
| 1397644_at   | 0.764          | 1.004 | -0.203 | 0.274 | -9.542  |
| 1368486_at   | 0.763          | 1.075 | -0.434 | 0.249 | -7.936  |
| 1369228_at   | 0.763          | 0.987 | 0.189  | 0.257 | -8.220  |
| 1369641_at   | 0.763          | 0.994 | 0.116  | 0.253 | -11.444 |
| 1371104_at   | 0.763          | 1.010 | 0.203  | 0.262 | -10.820 |
| 1372270_at   | 0.763          | 1.023 | -0.128 | 0.250 | -8.777  |
| 1374045_at   | 0.763          | 0.995 | -0.112 | 0.258 | -9.186  |
| 1374176_at   | 0.763          | 0.998 | 0.118  | 0.254 | -9.332  |
| 1375663_at   | 0.763          | 1.022 | 0.108  | 0.260 | -10.832 |
| 1377761_at   | 0.763          | 0.992 | -0.254 | 0.267 | -6.543  |
| 1383058_at   | 0.763          | 1.040 | -0.338 | 0.257 | -8.979  |
| 1386945_a_at | 0.763          | 1.037 | -0.178 | 0.253 | -8.900  |
| 1387064_at   | 0.763          | 1.020 | -0.133 | 0.259 | -8.985  |
| 1387214_at   | 0.763          | 1.079 | -0.406 | 0.268 | -6.558  |
| 1387703_a_at | 0.763          | 1.148 | -0.577 | 0.272 | -6.013  |
| 1395525_at   | 0.763          | 1.058 | -0.381 | 0.259 | -4.961  |
| 1397713_at   | 0.763          | 0.984 | -0.142 | 0.261 | -9.398  |
| 1398126_at   | 0.763          | 0.960 | -0.185 | 0.258 | -5.153  |
| 1378998_at   | 0.762          | 1.041 | 0.167  | 0.260 | -7.053  |
| 1379425_at   | 0.762          | 0.984 | -0.184 | 0.261 | -9.323  |
| 1383099_at   | 0.762          | 0.986 | -0.424 | 0.250 | -5.074  |
| 1384863_at   | 0.762          | 0.981 | -0.240 | 0.269 | -5.696  |
| 1389521_at   | 0.762          | 1.002 | 0.128  | 0.256 | -8.143  |
| 1390445_at   | 0.762          | 1.014 | -0.153 | 0.263 | -9.412  |
| 1390931_at   | 0.762          | 1.005 | 0.108  | 0.265 | -6.395  |
| 1393019_at   | 0.762          | 0.992 | -0.105 | 0.257 | -9.691  |

**Table S1.** Estimated parameters and regression coefficient values for the sinusoidal curve  $A\sin(Bt+C)+\text{mean}$  for individual probe sets mined for circadian oscillations in expression

| Probe set ID | R <sup>2</sup> | Mean  | A      | B     | C       |
|--------------|----------------|-------|--------|-------|---------|
| 1393227_at   | 0.762          | 0.993 | -0.226 | 0.260 | -9.372  |
| 1393469_at   | 0.762          | 1.023 | 0.283  | 0.272 | -7.027  |
| 1368691_at   | 0.761          | 0.911 | -0.260 | 0.253 | -4.924  |
| 1373153_at   | 0.761          | 1.004 | -0.165 | 0.261 | -8.964  |
| 1374001_at   | 0.761          | 1.007 | 0.109  | 0.258 | -6.129  |
| 1377632_at   | 0.761          | 0.979 | -0.300 | 0.258 | -6.089  |
| 1383422_at   | 0.761          | 1.047 | 0.268  | 0.260 | -6.362  |
| 1388866_at   | 0.761          | 0.991 | -0.191 | 0.261 | -5.676  |
| 1389912_at   | 0.761          | 0.966 | -0.209 | 0.254 | -5.307  |
| 1397634_at   | 0.761          | 0.987 | 0.131  | 0.262 | -7.680  |
| 1368673_at   | 0.76           | 1.020 | -0.235 | 0.255 | -5.332  |
| 1372152_at   | 0.76           | 0.993 | 0.097  | 0.255 | -11.340 |
| 1373283_at   | 0.76           | 1.017 | -0.145 | 0.260 | -9.459  |
| 1373680_at   | 0.76           | 0.986 | 0.099  | 0.263 | -8.155  |
| 1376146_at   | 0.76           | 1.021 | -0.122 | 0.250 | -8.518  |
| 1393505_x_at | 0.76           | 0.977 | -0.254 | 0.272 | -5.970  |
| 1398727_at   | 0.76           | 0.968 | -0.209 | 0.266 | -9.763  |
| 1369917_at   | 0.759          | 1.004 | -0.131 | 0.266 | -9.743  |
| 1371924_at   | 0.759          | 1.007 | -0.206 | 0.252 | -9.202  |
| 1372459_at   | 0.759          | 1.008 | -0.129 | 0.253 | -8.617  |
| 1374416_at   | 0.759          | 1.018 | -0.135 | 0.248 | -8.454  |
| 1376594_at   | 0.759          | 0.964 | -0.198 | 0.256 | -5.208  |
| 1379495_at   | 0.759          | 1.011 | 0.232  | 0.263 | -6.538  |
| 1380882_at   | 0.759          | 1.012 | 0.108  | 0.255 | -7.954  |
| 1384486_at   | 0.759          | 1.018 | 0.251  | 0.264 | -7.049  |
| 1386770_x_at | 0.759          | 1.005 | -0.253 | 0.262 | -9.095  |
| 1391737_at   | 0.759          | 1.011 | -0.280 | 0.251 | -8.844  |
| 1368571_at   | 0.758          | 1.094 | -0.375 | 0.249 | -8.240  |
| 1372364_a_at | 0.758          | 1.001 | 0.096  | 0.266 | -10.990 |
| 1376861_at   | 0.758          | 1.022 | -0.124 | 0.257 | -9.007  |
| 1378001_at   | 0.758          | 0.984 | -0.231 | 0.266 | -7.949  |
| 1384481_at   | 0.758          | 0.976 | -0.175 | 0.252 | -9.178  |
| 1385108_at   | 0.758          | 0.969 | -0.476 | 0.257 | -5.272  |
| 1392648_at   | 0.758          | 1.015 | -0.135 | 0.273 | -6.398  |
| 1367760_at   | 0.757          | 0.990 | 0.074  | 0.256 | -5.968  |
| 1368025_at   | 0.757          | 1.212 | -0.466 | 0.274 | -5.405  |
| 1371883_at   | 0.757          | 1.003 | -0.237 | 0.263 | -5.027  |
| 1372110_at   | 0.757          | 1.017 | -0.180 | 0.252 | -9.287  |
| 1373178_at   | 0.757          | 1.003 | 0.108  | 0.264 | -8.107  |
| 1373303_at   | 0.757          | 0.983 | -0.251 | 0.254 | -4.985  |

**Table S1.** Estimated parameters and regression coefficient values for the sinusoidal curve  $A\sin(Bt+C)+\text{mean}$  for individual probe sets mined for circadian oscillations in expression

| Probe set ID | R <sup>2</sup> | Mean  | A      | B     | C       |
|--------------|----------------|-------|--------|-------|---------|
| 1373699_at   | 0.757          | 1.020 | -0.112 | 0.265 | -4.836  |
| 1376610_a_at | 0.757          | 0.987 | 0.130  | 0.256 | -6.623  |
| 1379755_at   | 0.757          | 0.990 | 0.116  | 0.258 | -6.992  |
| 1380326_at   | 0.757          | 0.959 | -0.142 | 0.262 | -4.933  |
| 1383310_at   | 0.757          | 0.980 | 0.151  | 0.266 | -6.824  |
| 1384183_at   | 0.757          | 1.033 | -0.304 | 0.267 | -5.342  |
| 1367950_at   | 0.756          | 1.006 | -0.215 | 0.267 | -9.554  |
| 1372454_at   | 0.756          | 1.011 | 0.140  | 0.248 | -11.243 |
| 1375898_at   | 0.756          | 1.024 | 0.089  | 0.260 | -7.591  |
| 1377238_at   | 0.756          | 0.982 | 0.157  | 0.256 | -6.513  |
| 1378168_at   | 0.756          | 0.999 | -0.274 | 0.260 | -7.694  |
| 1378666_at   | 0.756          | 0.896 | -0.493 | 0.257 | -5.124  |
| 1388792_at   | 0.756          | 1.046 | -0.226 | 0.255 | -7.874  |
| 1389509_at   | 0.756          | 1.004 | 0.080  | 0.257 | -11.876 |
| 1389553_at   | 0.756          | 0.975 | -0.220 | 0.260 | -9.262  |
| 1389805_at   | 0.756          | 1.016 | -0.191 | 0.260 | -9.299  |
| 1398387_at   | 0.756          | 1.000 | 0.198  | 0.263 | -11.664 |
| 1398999_at   | 0.756          | 1.022 | -0.140 | 0.251 | -8.975  |
| 1371859_at   | 0.755          | 0.989 | -0.127 | 0.257 | -8.838  |
| 1373957_at   | 0.755          | 1.013 | -0.202 | 0.261 | -6.549  |
| 1374544_at   | 0.755          | 1.019 | -0.232 | 0.254 | -8.950  |
| 1378526_at   | 0.755          | 0.998 | -0.137 | 0.262 | -8.972  |
| 1379703_at   | 0.755          | 0.994 | -0.141 | 0.247 | -9.396  |
| 1380923_at   | 0.755          | 0.997 | -0.347 | 0.261 | -5.687  |
| 1389602_at   | 0.755          | 1.008 | -0.070 | 0.256 | -8.677  |
| 1389659_at   | 0.755          | 1.010 | -0.181 | 0.261 | -9.275  |
| 1395267_at   | 0.755          | 0.988 | 0.161  | 0.257 | -10.921 |
| 1368533_at   | 0.754          | 0.994 | 0.092  | 0.258 | -7.104  |
| 1371332_at   | 0.754          | 1.020 | 0.095  | 0.255 | -11.256 |
| 1372103_at   | 0.754          | 1.015 | -0.162 | 0.263 | -7.059  |
| 1372777_at   | 0.754          | 1.035 | -0.140 | 0.253 | -8.676  |
| 1374032_at   | 0.754          | 0.989 | -0.109 | 0.260 | -9.039  |
| 1374948_at   | 0.754          | 0.991 | -0.115 | 0.262 | -9.509  |
| 1375088_at   | 0.754          | 1.022 | -0.198 | 0.255 | -7.435  |
| 1384216_at   | 0.754          | 1.067 | 0.304  | 0.267 | -6.619  |
| 1388239_at   | 0.754          | 1.043 | -0.645 | 0.266 | -5.341  |
| 1389230_at   | 0.754          | 1.008 | -0.126 | 0.265 | -9.649  |
| 1389402_at   | 0.754          | 1.046 | 0.208  | 0.272 | -8.671  |
| 1394109_at   | 0.754          | 1.089 | -0.315 | 0.254 | -7.545  |
| 1367624_at   | 0.753          | 0.994 | 0.089  | 0.263 | -10.786 |



**Table S1.** Estimated parameters and regression coefficient values for the sinusoidal curve  $A\sin(Bt+C)+\text{mean}$  for individual probe sets mined for circadian oscillations in expression

| Probe set ID | R <sup>2</sup> | Mean  | A      | B     | C       |
|--------------|----------------|-------|--------|-------|---------|
| 1377113_at   | 0.753          | 1.004 | 0.137  | 0.260 | -6.569  |
| 1377790_at   | 0.753          | 1.021 | -0.201 | 0.251 | -8.999  |
| 1379366_a_at | 0.753          | 1.006 | 0.163  | 0.252 | -11.370 |
| 1387060_at   | 0.753          | 1.030 | -0.149 | 0.262 | -5.331  |
| 1387872_at   | 0.753          | 1.000 | -0.112 | 0.257 | -9.654  |
| 1392023_at   | 0.753          | 0.987 | 0.096  | 0.258 | -6.130  |
| 1392739_a_at | 0.753          | 1.006 | 0.198  | 0.251 | -11.417 |
| 1394101_at   | 0.753          | 0.993 | 0.110  | 0.260 | -10.801 |
| 1395058_at   | 0.753          | 0.935 | -0.394 | 0.253 | -5.362  |
| 1367890_at   | 0.752          | 0.990 | -0.119 | 0.266 | -9.648  |
| 1369236_at   | 0.752          | 1.001 | -0.130 | 0.262 | -5.747  |
| 1371186_at   | 0.752          | 1.017 | -0.255 | 0.255 | -5.356  |
| 1373243_at   | 0.752          | 1.002 | -0.168 | 0.269 | -6.967  |
| 1373287_at   | 0.752          | 1.016 | 0.137  | 0.252 | -6.836  |
| 1373808_at   | 0.752          | 0.995 | 0.128  | 0.265 | -6.286  |
| 1374400_at   | 0.752          | 1.017 | -0.099 | 0.264 | -9.167  |
| 1374513_at   | 0.752          | 1.011 | 0.061  | 0.261 | -11.849 |
| 1376571_at   | 0.752          | 1.022 | -0.152 | 0.249 | -8.914  |
| 1382303_at   | 0.752          | 0.976 | 0.201  | 0.250 | -6.550  |
| 1382305_at   | 0.752          | 1.013 | -0.290 | 0.253 | -8.175  |
| 1382480_at   | 0.752          | 0.990 | 0.106  | 0.262 | -7.798  |
| 1382481_a_at | 0.752          | 1.001 | 0.136  | 0.260 | -7.144  |
| 1388838_at   | 0.752          | 1.013 | -0.102 | 0.249 | -8.902  |
| 1390907_at   | 0.752          | 1.023 | -0.184 | 0.261 | -9.390  |
| 1391998_at   | 0.752          | 1.017 | -0.261 | 0.261 | -5.720  |
| 1392422_at   | 0.752          | 0.997 | 0.097  | 0.253 | -11.295 |
| 1398799_at   | 0.752          | 1.000 | -0.070 | 0.258 | -7.614  |
| 1367602_at   | 0.751          | 1.029 | 0.155  | 0.269 | -7.273  |
| 1367978_at   | 0.751          | 1.000 | -0.162 | 0.253 | -8.920  |
| 1368300_at   | 0.751          | 1.016 | -0.196 | 0.255 | -8.957  |
| 1368596_at   | 0.751          | 0.970 | -0.205 | 0.256 | -5.655  |
| 1369625_at   | 0.751          | 1.035 | 0.155  | 0.250 | -11.058 |
| 1373775_at   | 0.751          | 1.013 | 0.091  | 0.257 | -6.783  |
| 1374189_at   | 0.751          | 1.006 | -0.140 | 0.255 | -15.289 |
| 1374490_at   | 0.751          | 1.001 | 0.142  | 0.273 | -7.343  |
| 1376837_at   | 0.751          | 0.983 | -0.176 | 0.258 | -9.342  |
| 1377639_at   | 0.751          | 1.001 | 0.165  | 0.259 | -11.474 |
| 1382436_at   | 0.751          | 1.003 | -0.180 | 0.267 | -9.503  |
| 1383642_at   | 0.751          | 0.987 | -0.179 | 0.270 | -7.644  |
| 1393640_at   | 0.751          | 1.011 | 0.133  | 0.273 | -7.214  |

**Table S1.** Estimated parameters and regression coefficient values for the sinusoidal curve  $A\sin(Bt+C)+\text{mean}$  for individual probe sets mined for circadian oscillations in expression

| Probe set ID | $R^2$ | Mean  | A      | B     | C       |
|--------------|-------|-------|--------|-------|---------|
| 1398996_at   | 0.751 | 0.990 | -0.145 | 0.252 | -9.033  |
| 1372645_at   | 0.75  | 1.032 | -0.124 | 0.257 | -9.472  |
| 1376457_at   | 0.75  | 1.027 | -0.170 | 0.267 | -7.495  |
| 1376596_at   | 0.75  | 0.995 | -0.108 | 0.257 | -9.470  |
| 1379556_a_at | 0.75  | 0.988 | 0.110  | 0.261 | -11.683 |
| 1390234_at   | 0.75  | 1.002 | 0.070  | 0.267 | -6.849  |
