# Supplementary material
Source: PubMed Central journal article supplement (PMC3119131)
Supplement: supp_japplphysiol.00079.2011_tableS2.pdf [file supp_japplphysiol.00079.2011_tableS2.pdf]

**Table S2. Detailed functional categorizations of probe sets showing circadian oscillations in expression**

| Probe ID                   | Accession # | Cluster | Symbol           | Gene name                                            | Function                                                          |
|----------------------------|-------------|---------|------------------|------------------------------------------------------|-------------------------------------------------------------------|
| <i>Signal transduction</i> |             |         |                  |                                                      |                                                                   |
| 1387395_at                 | NM_017161   | 1       | <i>Adora2b</i>   | Adenosine a2b receptor                               | Activates adenylyl cyclase                                        |
| 1383205_at                 | BI288833    | 1       | <i>Dact2</i>     | Dapper, antagonist of $\beta$ -catenin, homolog 2    | Negatively regulates the Nodal signaling pathway                  |
| 1370941_at                 | AI232379    | 1       | <i>Pdgfra</i>    | Platelet-derived growth factor receptor, $\alpha$    | Mitogenesis, wound healing & tissue repair                        |
| 1373847_at                 | AW435343    | 1       | <i>Tm4sf1</i>    | Transmembrane 4 I six family 1                       | Regulation of cell development, activation, growth & motility     |
| 1371785_at                 | BI303379    | 1       | <i>Tnfrsf12a</i> | Tumor necrosis factor receptor superfamily, 12a      | Angiogenesis, endothelial cell proliferation & cell adhesion      |
| 1368868_at                 | NM_057103   | 2       | <i>*Ikap12</i>   | A kinase anchor protein 12                           | Anchoring protein in PKA signaling pathway                        |
| 1368869_at                 | BG663107    | 2       | <i>*Ikap12</i>   | A kinase anchor protein 12                           | Anchoring protein in PKA signaling pathway                        |
| 1374539_at                 | AA850290    | 2       | <i>Atp10d</i>    | Atpase, class v, type 10d                            | Phospholipid translocation within membranes                       |
| 1387083_at                 | NM_017129   | 2       | <i>Ctfl</i>      | Cardiotrophin 1                                      | Angiogenesis & anti-inflammatory cytokine properties              |
| 1373114_at                 | AI408442    | 2       | <i>*Dx4</i>      | Deltex homolog 4                                     | Regulator of Notch signaling & cell-cell communication            |
| 1377982_at                 | AW915930    | 2       | <i>*Dx4</i>      | Deltex homolog 4                                     | Regulator of Notch signaling & cell-cell communication            |
| 1378342_at                 | BF284819    | 2       | <i>*Ednra</i>    | Endothelin receptor type a                           | Vasoconstriction & cell proliferation                             |
| 1385529_at                 | BF411402    | 2       | <i>Fam3b</i>     | Family with sequence similarity 3, b                 | Inhibits basal insulin secretion                                  |
| 1389602_at                 | BF396759    | 2       | <i>Fam3c</i>     | Family with sequence similarity 3, c                 | A cytokine involved in EMT & tumor formation in epithelial cells  |
| 1370086_at                 | NM_012559   | 2       | <i>Fgg</i>       | Fibrinogen $\gamma$ chain                            | Platelet aggregation & blood clotting                             |
| 1370843_at                 | BM391912    | 2       | <i>Gng8</i>      | Guanine nucleotide binding protein, $\gamma$ 8       | Modulator or transducer in various transmembrane signaling        |
| 1368408_at                 | NM_030829   | 2       | <i>Grk5</i>      | G protein-coupled receptor kinase 5                  | Regulation of the motility of polymorphonuclear leukocytes        |
| 1377163_at                 | BM385741    | 2       | <i>Inhbb</i>     | Inhibin, $\beta$ b                                   | Inhibits cellular proliferation                                   |
| 1373036_at                 | BF283621    | 2       | <i>Iqgap2</i>    | Iq motif containing gtpase activating protein 2      | Regulation of cell morphology & motility                          |
| 1368486_at                 | NM_032074   | 2       | <i>Irs3</i>      | Insulin receptor substrate 3                         | Insulin signal transduction                                       |
| 1374065_at                 | BG378920    | 2       | <i>Met/Hgf</i>   | Met proto-oncogene                                   | HGF receptor involved in cell proliferation & survival            |
| 1368795_at                 | NM_023100   | 2       | <i>Nmur1</i>     | Neuromedin u receptor 1                              | Vasoconstriction, SM contraction                                  |
| 1385148_at                 | BM391148    | 2       | <i>*P2rx1</i>    | Purinergic receptor p2x, ligand-gated ion channel, 1 | Calcium ion transport & vasoconstriction                          |
| 1388512_at                 | BM391512    | 2       | <i>Pde6d</i>     | Phosphodiesterase 6d, cgmp-specific, rod, $\delta$   | Cellular levels, localization & duration of action of cAMP & cGMP |
| 1370642_s_at               | BM389426    | 2       | <i>Pdgfrb</i>    | Platelet-derived growth factor receptor, $\beta$     | Vascular & tissue remodeling                                      |
| 1387459_at                 | NM_012627   | 2       | <i>Pkib</i>      | PK inhibitor $\beta$                                 | Potent competitive inhibitor of cAMP-dependent PK                 |
| 1373631_at                 | BF284067    | 2       | <i>Rap1gap</i>   | Rap1 gtpase activating protein                       | GTPase activator for the nuclear Ras-related RAP-1A               |
| 1388686_at                 | AI170193    | 2       | <i>Rcan1</i>     | Regulator of calcineurin 1                           | Inhibits calcineurin-dependent responses                          |
| 1399027_at                 | AI408053    | 2       | <i>Rhoa</i>      | Ras homolog gene family, a                           | Assembly of focal adhesions & actin stress fibers                 |

\* Genes represented by multiple probe sets

**Table S2. Detailed functional categorizations of probe sets showing circadian oscillations in expression**

| Probe ID                   | Accession # | Cluster | Symbol         | Gene name                                            | Function                                                      |
|----------------------------|-------------|---------|----------------|------------------------------------------------------|---------------------------------------------------------------|
| <i>Signal transduction</i> |             |         |                |                                                      |                                                               |
| 1381533_at                 | AI144754    | 2       | <i>Rnd1</i>    | Rho family gtpase 1                                  | Rearrangements of the actin cytoskeleton                      |
| 1387294_at                 | NM_054011   | 2       | <i>Sh3bp5</i>  | Sh3-domain binding protein 5                         | Inhibits cellular proliferation                               |
| 1367726_at                 | NM_031134   | 2       | <i>*Thra</i>   | Thyroid hormone receptor, $\alpha$                   | Growth & metabolism                                           |
| 1369484_at                 | NM_031590   | 2       | <i>Wsp2</i>    | Wnt1 inducible signaling pathway protein 2           | Wnt signaling                                                 |
| 1387219_at                 | NM_012715   | 2       | <i>Adm</i>     | Adrenomedullin                                       | Potent hypotensive & vasodilatory agent                       |
| 1378010_at                 | BG662522    | 3       | <i>Acrv2a</i>  | Activin a receptor, type iia                         | Activates SMAD transcriptional regulators                     |
| 1367978_at                 | NM_031007   | 3       | <i>Adcy2</i>   | Adenylate cyclase 2                                  | Membrane-bound, calmodulin-insensitive adenylyl cyclase       |
| 1368300_at                 | NM_055294   | 3       | <i>Adora2a</i> | Adenosine a2a receptor                               | Activates adenylyl cyclase                                    |
| 1389496_at                 | BI3400893   | 3       | <i>Akap7</i>   | A kinase anchor protein 7                            | PKA signaling pathway                                         |
| 1388527_at                 | BI283685    | 3       | <i>Atoxr1</i>  | Anthrax toxin receptor 1                             | Cell adhesion & migration                                     |
| 1389017_at                 | AI013888    | 3       | <i>Atoxr2</i>  | Anthrax toxin receptor 2                             | Cell adhesion & migration                                     |
| 1389651_at                 | AI177057    | 3       | <i>Apln</i>    | Apelin                                               | Control of body fluid homeostasis                             |
| 1373156_at                 | AI385330    | 3       | <i>Armcx2</i>  | Armadillo repeat containing, x-linked 2              | Wnt signaling                                                 |
| 1398874_at                 | BI274345    | 3       | <i>Axin10</i>  | Axin 10                                              | Regulation of intracellular glycosylation level & homeostasis |
| 1388802_at                 | AI579422    | 3       | <i>Bex1</i>    | Brain expressed, x-linked 1                          | Signaling adapter molecule in p75NTR/NGFR signaling           |
| 1383641_at                 | BF414702    | 3       | <i>*Ednra</i>  | Endothelin receptor type a                           | Vasoconstriction & cell proliferation                         |
| 1390638_at                 | AI072459    | 3       | <i>Epha4</i>   | Eph receptor a4                                      | Cell adhesion, migration & survival                           |
| 1374209_at                 | AI010575    | 3       | <i>Erlin2</i>  | Er lipid raft associated 2                           | ITPPI degradation by the ERAD pathway                         |
| 1374643_at                 | BF288461    | 3       | <i>Fat4</i>    | Fat tumor suppressor homolog 4                       | Regulation of cell-cell interactions & cell polarity          |
| 1393314_at                 | BI289840    | 3       | <i>Fgf1</i>    | Fibroblast growth factor 1                           | Mitogenesis, tissue repair & angiogenesis                     |
| 1373882_at                 | AI170324    | 3       | <i>Fgf3</i>    | C-fos induced growth factor                          | Angiogenesis & lymphangiogenesis                              |
| 1378526_at                 | AI012423    | 3       | <i>Gimap6</i>  | Gtpase, imap family 6                                | Regulation of apoptosis of T cells                            |
| 1367902_at                 | NM_022396   | 3       | <i>Gng11</i>   | Guanine nucleotide binding protein, $\gamma$ 11      | Modulator of transmembrane signaling systems                  |
| 1394919_at                 | BF284043    | 3       | <i>Hgf</i>     | Hepatocyte growth factor                             | Mitogenesis, cell motility, matrix invasion & angiogenesis    |
| 1376957_at                 | AI178922    | 3       | <i>Lzic</i>    | Leucine zipper & ctmbip1 domain containing           | Wnt signaling regulation                                      |
| 1367760_at                 | D13341      | 3       | <i>Map2k1</i>  | Mitogen-activated PK kinase 1                        | Cell proliferation & differentiation                          |
| 1369178_a_at               | AF231010    | 3       | <i>*P2rx1</i>  | Purinergic receptor p2x, ligand-gated ion channel, 1 | Calcium ion transport & vasoconstriction                      |
| 1379375_at                 | BE100812    | 3       | <i>Pdgfra</i>  | Platelet-derived growth factor $\alpha$              | Mitogenesis, wound healing & tissue repair                    |
| 1370203_at                 | AI4408972   | 3       | <i>Pgap2</i>   | Post-gpi attachment to proteins 2                    | Lipid remodeling                                              |

\* Genes represented by multiple probe sets

**Table S2. Detailed functional categorizations of probe sets showing circadian oscillations in expression**

| Probe ID                   | Accession # | Cluster | Symbol         | Gene name                                            | Function                                                        |
|----------------------------|-------------|---------|----------------|------------------------------------------------------|-----------------------------------------------------------------|
| <i>Signal transduction</i> |             |         |                |                                                      |                                                                 |
| 1376762_at                 | BE112933    | 3       | <i>Plekha1</i> | Pleckstrin homology domain containing, family a 1    | Binds to phosphatidylinositol-3,4-diphosphate                   |
| 1389341_at                 | AI102248    | 3       | <i>Pknox1</i>  | Plexin d1                                            | Vascular development & angiogenesis                             |
| 1386945_a_at               | NM_031976   | 3       | <i>Prkab1</i>  | PK, amp-activated, $\beta$ 1 non-catalytic subunit   | Regulatory subunit of AMPK, a monitor of cellular energy status |
| 1373047_at                 | BF284699    | 3       | <i>Prkci</i>   | PKC, iota                                            | Cell polarity & tight junction formation                        |
| 1390159_at                 | AA819332    | 3       | <i>Rasgrp3</i> | Ras guanyl releasing protein 3                       | Guanine nucleotide exchange factor for Ras & Rap1               |
| 1373934_at                 | AI178214    | 3       | <i>Rassf3</i>  | Ras association domain family 3                      | RAS effector protein                                            |
| 1381969_at                 | AA998296    | 3       | <i>Rbpj</i>    | Recombination signal binding protein J               | Notch signaling, cell-cell interactions                         |
| 1385540_at                 | A1044916    | 3       | <i>Rspo1</i>   | R-spondin homolog                                    | Cell proliferation & epithelial healing                         |
| 1377198_at                 | AA891732    | 3       | <i>*Skap2</i>  | Src kinase associated phosphoprotein 2               | Src signaling & integrin activation                             |
| 1369979_at                 | NM_130413   | 3       | <i>*Skap2</i>  | Src kinase associated phosphoprotein 2               | Src signaling & integrin activation                             |
| 1370691_a_at               | M18028      | 3       | <i>*Thra</i>   | Thyroid hormone receptor, $\alpha$                   | Growth & metabolism                                             |
| 1383805_at                 | BG666454    | 3       | <i>*Tnik</i>   | Traf2 & nek interacting kinase                       | Activator of Wnt signaling                                      |
| 1380100_at                 | AW526268    | 3       | <i>*Tnik</i>   | Traf2 & nek interacting kinase                       | Activator of Wnt signaling                                      |
| 1396144_at                 | BF560978    | 3       | <i>*Tnik</i>   | Traf2 & nek interacting kinase                       | Activator of Wnt signaling                                      |
| 1388769_at                 | BI287266    | 3       | <i>Traf7</i>   | Tnf receptor-associated factor 7                     | Tnf signaling & NFkB activation                                 |
| 1373399_at                 | BI291997    | 3       | <i>Wdr6</i>    | Wd repeat domain 6                                   | Enhances the STK11-induced cell growth suppression              |
| 1394361_a_at               | BF556985    | 3       | <i>*Wnt2</i>   | Wingless-type mmtv integration site family 2         | Wnt signaling, cell proliferation & differentiation             |
| 1386807_at                 | BF556985    | 3       | <i>*Wnt2</i>   | Wingless-type mmtv integration site family 2         | Wnt signaling, cell proliferation & differentiation             |
| 1393927_at                 | AA997477    | 3       | <i>*Wnt2</i>   | Wingless-type mmtv integration site family 2         | Wnt signaling, cell proliferation & differentiation             |
| 1390727_at                 | BF398618    | 3       | <i>Ehna5</i>   | Ephrin-a5                                            | Receptor protein-tyrosine kinases involved in organ development |
| 1391428_at                 | AI639162    | 4       | <i>Angptl</i>  | Angiopoietin 1                                       | Vascular development & angiogenesis                             |
| 1381018_a_at               | BG378709    | 4       | <i>*Asap1</i>  | Arfgap with sh3 domain, ankyrin repeat & ph domain 1 | Differentiation of fibroblasts & cytoskeleton remodeling        |
| 1390441_at                 | AW527409    | 4       | <i>*Asap1</i>  | Arfgap with sh3 domain, ankyrin repeat & ph domain 1 | Differentiation of fibroblasts & cytoskeleton remodeling        |
| 1368202_a_at               | NM_024159   | 4       | <i>Dab2</i>    | Disabled homolog 2                                   | Component of the CSF-1 signal transduction pathway              |
| 1393335_at                 | BF418373    | 4       | <i>Egfl6</i>   | Egf-llke-domain, multiple 6                          | Integrin binding & ECM assembly                                 |
| 1373829_at                 | AI412658    | 4       | <i>Fgfr2</i>   | Fibroblast growth factor receptor 2                  | Mitogenesis, tissue repair & angiogenesis                       |
| 1377113_at                 | BF415786    | 4       | <i>Fhl1</i>    | Fms-related tyrosine kinase 1                        | Vascular development & angiogenesis                             |
| 1393883_at                 | AI556852    | 4       | <i>Fhl4</i>    | Fms-related tyrosine kinase 4                        | Receptor for VEGFC                                              |
| 1373683_at                 | AI230396    | 4       | <i>Fyn</i>     | Fyn oncogene related to src, fgr, yes                | Regulation of intracellular calcium levels & cell cycle         |

\* Genes represented by multiple probe sets

**Table S2. Detailed functional categorizations of probe sets showing circadian oscillations in expression**

| Probe ID                   | Accession # | Cluster | Symbol           | Gene name                                                    | Function                                                            |
|----------------------------|-------------|---------|------------------|--------------------------------------------------------------|---------------------------------------------------------------------|
| <i>Signal transduction</i> |             |         |                  |                                                              |                                                                     |
| 1383047_at                 | AA957335    | 4       | <i>Gas6</i>      | Growth arrest-specific 6                                     | Thrombosis & cell adhesion, migration & proliferation               |
| 1375692_at                 | AI229025    | 4       | <i>Mapk1</i>     | Mitogen-activated PK 1                                       | Integration point for multiple biochemical signals                  |
| 1393356_at                 | AA818098    | 4       | <i>Pde5a</i>     | Phosphodiesterase 5a, cgrp-specific                          | Regulating the intracellular concentration of cyclic nucleotides    |
| 1386145_at                 | AI236118    | 4       | <i>Plscr4</i>    | Phospholipid scramblase 4                                    | Initiation of fibrin clot formation                                 |
| 1383310_at                 | AI030892    | 4       | <i>Ppp6c</i>     | Protein phosphatase 6, catalytic subunit                     | Regulation of cell cycle progression                                |
| 1375011_at                 | AA818819    | 4       | <i>Ptch1</i>     | Patched homolog 1                                            | Hedgehog signaling & lung development                               |
| 1376619_at                 | AI412803    | 4       | <i>*Piprd</i>    | Protein tyrosine phosphatase, receptor type, d               | Cell growth, differentiation and mitotic cycle                      |
| 1374591_at                 | AI409042    | 4       | <i>*Piprd</i>    | Protein tyrosine phosphatase, receptor type, d               | Cell growth, differentiation and mitotic cycle                      |
| 1387074_at                 | AY043246    | 4       | <i>*Rgs2</i>     | Regulator of g-protein signaling 2, 24kda                    | Increases the GTPase activity of G protein $\alpha$ subunits        |
| 1395986_at                 | BF391439    | 4       | <i>*Slit2</i>    | Slit homolog 2                                               | Angiogenesis & cell migration                                       |
| 1382685_at                 | AI101660    | 4       | <i>*Slit2</i>    | Slit homolog 2                                               | Angiogenesis & cell migration                                       |
| 1376880_at                 | AI639447    | 4       | <i>Tbk1</i>      | Tank-binding kinase 1                                        | Mediates Nf $\kappa$ B activation                                   |
| 1389780_at                 | AI009783    | 4       | <i>Tjpi</i>      | Tissue factor pathway inhibitor                              | Inhibition of tissue factor-dependent pathway of blood coagulation  |
| 1383368_at                 | BF550060    | 4       | <i>*Tor1aip2</i> | Torsin a interacting protein 2                               | Re-targets TorsinA to the nuclear envelope                          |
| 1374798_at                 | AA924151    | 4       | <i>*Tor1aip2</i> | Torsin a interacting protein 2                               | Re-targets TorsinA to the nuclear envelope                          |
| 1397634_at                 | BE098186    | 5       | <i>Anks1a</i>    | Ankyrin repeat & sterile $\alpha$ motif domain containing 1a | Adaptor protein for receptors like EGFR, PDGFR & EphA8              |
| 1384260_at                 | BE095699    | 5       | <i>Frat2</i>     | Frequently rearranged in advanced t-cell lymphomas 2         | Positively regulates the Wnt signaling                              |
| 1376909_at                 | AI412866    | 5       | <i>Ras10a</i>    | Ras-like, family 10, a                                       | Potential tumor suppressor                                          |
| 1368144_at                 | AF321837    | 5       | <i>*Rgs2</i>     | Regulator of g-protein signaling 2, 24kda                    | Increases the GTPase activity of G protein $\alpha$ subunits        |
| 1369725_at                 | NM_020101   | 6       | <i>Adap2</i>     | Arfgap with dual ph domains 2                                | GTPase-activating protein for the ADP ribosylation factor family    |
| 1387128_at                 | NM_130779   | 6       | <i>Adcy3</i>     | Adenylate cyclase 3                                          | Modulation of intracellular cAMP concentration                      |
| 1369115_at                 | AY057895    | 6       | <i>Adrb2</i>     | Adrenergic, $\beta$ -2-, receptor, surface                   | Catecholamine-induced activation of adenylate cyclase               |
| 1378666_at                 | BE108537    | 6       | <i>Arhgap21</i>  | Rho gtpase activating protein 21                             | GTPase-activating protein for CDC42                                 |
| 1373403_at                 | AI230625    | 6       | <i>C8orf4</i>    | Chromosome 8 open reading frame 4                            | Positive regulator of Wnt signaling                                 |
| 1368025_at                 | NM_080906   | 6       | <i>Ddit4</i>     | Dna-damage-inducible transcript 4                            | Regulation of FRAP1 pathway & inhibits cell growth                  |
| 1368673_at                 | NM_031764   | 6       | <i>Daf2</i>      | Discoidin domain receptor tyrosine kinase 2                  | Tyrosine kinase receptor for collagen mediates fibroblast migration |
| 1390127_at                 | BI296216    | 6       | <i>Dixdc1</i>    | Dix domain containing 1                                      | Positive effector of the Wnt signaling                              |
| 1376208_at                 | BF419406    | 6       | <i>Dlg2</i>      | Discs, large homolog 2                                       | Regulates surface expression of NMDA receptors                      |
| 1383894_at                 | BI289486    | 6       | <i>Fnrip1</i>    | Follistatin interacting protein 1                            | Menergy &/or nutrient sensing                                       |

\* Genes represented by multiple probe sets

**Table S2. Detailed functional categorizations of probe sets showing circadian oscillations in expression**

| Probe ID                   | Accession # | Cluster | Symbol          | Gene name                                                | Function                                                         |
|----------------------------|-------------|---------|-----------------|----------------------------------------------------------|------------------------------------------------------------------|
| <i>Signal transduction</i> |             |         |                 |                                                          |                                                                  |
| 1368691_at                 | M85036      | 6       | <i>Gria3</i>    | Glutamate receptor, ionotropic, ampa 3                   | Opening of cat ion channels                                      |
| 1371091_at                 | BE118080    | 6       | <i>Irs2</i>     | Insulin receptor substrate 2                             | Insulin signal transduction                                      |
| 1383169_at                 | BF563716    | 6       | * <i>Lifr</i>   | Leukemia inhibitory factor receptor $\alpha$             | Cell proliferation, differentiation & survival                   |
| 1369228_at                 | NM_031048   | 6       | * <i>Lifr</i>   | Leukemia inhibitory factor receptor $\alpha$             | Cell proliferation, differentiation & survival                   |
| 1373178_at                 | AA945183    | 6       | * <i>Lifr</i>   | Leukemia inhibitory factor receptor $\alpha$             | Cell proliferation, differentiation & survival                   |
| 1395957_at                 | AW52142     | 6       | * <i>Lifr</i>   | Leukemia inhibitory factor receptor $\alpha$             | Cell proliferation, differentiation & survival                   |
| 1395413_at                 | BE116600    | 6       | <i>Lrp6</i>     | Low density lipoprotein receptor-related protein 6       | Wnt signaling, coreceptor for Wnt                                |
| 1380926_at                 | AA957632    | 6       | <i>Map3k2</i>   | Mitogen-activated PK kinase kinase 2                     | Regulation of JNK & ERK5 pathways                                |
| 1371883_at                 | BG376037    | 6       | <i>Mnd</i>      | Monocyte to macrophage differentiation-associated        | Dynamics of lysosomal membranes                                  |
| 1384904_at                 | AW527233    | 6       | <i>Nato2</i>    | Neuropilin & tolloid -like 2                             | Internalization of clathrin coated pits during endocytosis       |
| 1379433_at                 | A1059449    | 6       | <i>Plk3c2a</i>  | Phosphoinositide-3-kinase, class 2, $\alpha$             | Phosphorylation of PtdIns, PtdIns4P & PtdInsP2                   |
| 1391187_at                 | B1303019    | 6       | <i>Ppl</i>      | Periplakin                                               | Localization signal in PKB/AKT-mediated signaling                |
| 1395826_at                 | BG664036    | 6       | <i>Ppp2r5e</i>  | Protein phosphatase 2, regulatory subunit b', $\epsilon$ | Negative control of cell growth & division                       |
| 1378415_at                 | BME86879    | 6       | * <i>Pkar2a</i> | PK, camp-dependent, regulatory, type ii, $\alpha$        | Regulate protein transport from endosomes to the Golgi apparatus |
| 1395246_at                 | A1104783    | 6       | * <i>Pkar2a</i> | PK, camp-dependent, regulatory, type ii, $\alpha$        | Regulate protein transport from endosomes to the Golgi apparatus |
| 1390731_at                 | B1288533    | 6       | <i>Rasgef1b</i> | Rasgef domain family, 1b                                 | Guanine nucleotide exchange factor for Ras family proteins       |
| 1383726_at                 | BG669800    | 6       | <i>Rgs7bp</i>   | Regulator of g-protein signaling 7 binding protein       | Regulator of G protein-coupled receptor signaling                |
| 1389632_at                 | AA799294    | 6       | <i>Rhoobt1</i>  | Rho-related bib domain containing 1                      | GTPase-mediated signaling & organization of the actin filament   |
| 1382632_at                 | A1069991    | 6       | <i>Robo2</i>    | Roundabout, axon guidance receptor, homolog 2            | Receptor for SH2, cell migration                                 |
| 1398582_at                 | A1045780    | 6       | <i>Rps6ka5</i>  | Ribosomal protein s6 kinase, 90kda, 5                    | Mitogen- & stress-induced phosphorylation of HMG14               |
| 1397335_at                 | AW532165    | 6       | <i>Sema3d</i>   | Sema domain, immunoglobulin domain , 3d                  | Binds to neuropilin                                              |
| 1373092_at                 | BE109587    | 6       | <i>Tgfb3</i>    | Transforming growth factor, $\beta$ receptor 3           | Facilitating Tg $\beta$ binding to its signaling receptors       |
| 1387561_at                 | NM_012685   | 6       | <i>Vipr1</i>    | Vasoactive intestinal peptide receptor 1                 | Smooth muscle relaxation & fluid homeostasis                     |
| 1370048_at                 | NM_053936   | 6       | <i>Lpar1</i>    | Lysophosphatidic acid receptor 1                         | Cell proliferation, platelet aggregation & SM contraction        |
| 1372752_at                 | BF282632    | 6       | <i>Tspan4</i>   | Tetraspanin 4                                            | Cell development, activation & motility                          |
| 1389912_at                 | B1289922    | 6       | <i>Ensa</i>     | Endosulfine $\alpha$                                     | Endogenous ligand for sulfonylurea receptor                      |
| 1369871_at                 | NM_017123   | 7       | <i>Areg</i>     | Amphiregulin                                             | Fibroblast proliferation & mitogenesis                           |
| 1367631_at                 | NM_022266   | 7       | <i>Ctgf</i>     | Connective tissue growth factor                          | Connective tissue mitotractant                                   |
| 1393634_at                 | AW530086    | 7       | <i>Nrg4</i>     | Neuregulin 4                                             | Activation of type I growth factor receptors                     |

\* Genes represented by multiple probe sets

**Table S2. Detailed functional categorizations of probe sets showing circadian oscillations in expression**

| Probe ID                                    | Accession # | Cluster | Symbol             | Gene name                                                | Function                                                          |
|---------------------------------------------|-------------|---------|--------------------|----------------------------------------------------------|-------------------------------------------------------------------|
| <i>Signal transduction</i>                  |             |         |                    |                                                          |                                                                   |
| 1390274_at                                  | AI170313    | 7       | * <i>Ptxn2</i>     | Plexin a2                                                | Coreceptor for SEMA3A, Cytoskeleton remodeling                    |
| 1392157_at                                  | BE106313    | 7       | * <i>Ptxn2</i>     | Plexin a2                                                | Coreceptor for SEMA3A, Cytoskeleton remodeling                    |
| 1375562_at                                  | BF408460    | 7       | <i>Ptprg</i>       | Protein tyrosine phosphatase, receptor type, g           | Cell growth, differentiation and mitotic cycle                    |
| 1368596_at                                  | NM_021693   | 7       | <i>Sik1</i>        | Salt-inducible kinase 1                                  | Inhibits CREB activity & represses the CREB-specific coactivators |
| 1372645_at                                  | AI233095    | UC      | <i>Par1</i>        | Presenilin associated, rhomboid-like                     | signal transduction via regulated intramembrane proteolysis       |
| 1371014_at                                  | BE097028    | UC      | <i>Ptch1</i>       | Phospholipase c, $\beta$ 1                               | Formation of inositol 1,4,5-trisphosphate & diacylglycerol        |
| 1384355_at                                  | BG666418    | UC      | * <i>Ptxn2</i>     | Plexin a2                                                | Coreceptor for SEMA3A, Cytoskeleton remodeling                    |
| 1383452_at                                  | BG670461    | UC      | <i>Ppp1r7</i>      | Protein phosphatase 1, regulatory subunit 7              | Regulatory subunit of protein phosphatase 1                       |
| 1380811_at                                  | BE105756    | UC      | <i>Pppn4</i>       | Protein tyrosine phosphatase, non-receptor type 4        | Junction between the membrane & the cytoskeleton                  |
| <i>Transcription/translation regulation</i> |             |         |                    |                                                          |                                                                   |
| 1367624_at                                  | NM_024403   | 1       | <i>Atf4</i>        | Activating transcription factor 4                        | Transcriptional activator that binds to cAMP response element     |
| 1392640_at                                  | AI412155    | 1       | <i>Cry1</i>        | Cryptochrome 1                                           | Regulator of the circadian feedback loop                          |
| 1371104_at                                  | AF286470    | 1       | * <i>Srebf1</i>    | Sterol regulatory element binding transcription factor 1 | Transcriptional activator required for lipid homeostasis          |
| 1398799_at                                  | NM_053974   | 1       | <i>Eif4e</i>       | Eukaryotic translation initiation factor 4e              | mRNA cap recognition & initiation of protein synthesis            |
| 1370510_a_at                                | AB012600    | 2       | <i>Arntl/Bmal1</i> | Aryl hydrocarbon receptor nuclear translocator-like      | Circadian rhythm, E box element binding                           |
| 1374575_at                                  | BI304123    | 2       | <i>Creb3l1</i>     | Camp responsive element binding protein 3-like 1         | Transcriptional regulation during endoplasmic reticulum stress    |
| 1389404_at                                  | AI008883    | 2       | <i>Foxo1</i>       | Forkhead box s1                                          | Transcriptional repressor for FASLG, FOXO3 & FOXO4 promoters      |
| 1392203_at                                  | AI029834    | 2       | <i>Hoxb2</i>       | Homeobox b2                                              | Sequence-specific transcription factor during development         |
| 1371832_at                                  | AW526333    | 2       | <i>Leo1</i>        | Leo1, paf1/rna polymerase2 complex component, homolog    | Involved in transcription initiation & elongation                 |
| 1376632_at                                  | AI602501    | 2       | <i>Lmcd1</i>       | Lim & cysteine-rich domains 1                            | activation of T cells signaling                                   |
| 1378482_at                                  | AI411065    | 2       | <i>Mdfic</i>       | Myod family inhibitor domain containing                  | Regulation of the WNT & JNK signaling                             |
| 1368488_at                                  | NM_053727   | 2       | <i>Nfil3</i>       | Nuclear factor, interleukin 3 regulated                  | Transcription regulation, D box element binding                   |
| 1383439_at                                  | BI278550    | 2       | <i>Npas2</i>       | Neuronal pas domain protein 2                            | Circadian rhythm, E box element binding                           |
| 1374078_at                                  | BI295133    | 2       | <i>Phf21a</i>      | Phd finger protein 21a                                   | Histone deacetylaseof repressor element-1                         |
| 1389509_at                                  | BE097016    | 2       | <i>Sup130</i>      | Sin3a-associated protein, 130kda                         | Subunit of the HDAC1-dependent SIN3A corepressor complex          |
| 1392990_at                                  | AI031004    | 2       | <i>Sox17</i>       | Sry -box 17                                              | SOX transcription factor                                          |
| 1373860_at                                  | BI297183    | 2       | <i>Sox4</i>        | Sry -box 4                                               | Transcriptional activator to the T-cell enhancer motif            |
| 1388426_at                                  | BF398848    | 2       | * <i>Srebf1</i>    | Sterol regulatory element binding transcription factor 1 | Transcriptional activator required for lipid homeostasis          |
| 1392966_at                                  | BF396256    | 2       | <i>Zfp410</i>      | Zinc finger protein 410                                  | Transcription factor for matrix-remodeling genes                  |

\* Genes represented by multiple probe sets

**Table S2. Detailed functional categorizations of probe sets showing circadian oscillations in expression**

| Probe ID                                    | Accession # | Cluster | Symbol          | Gene name                                                  | Function                                                        |
|---------------------------------------------|-------------|---------|-----------------|------------------------------------------------------------|-----------------------------------------------------------------|
| <i>Transcription/translation regulation</i> |             |         |                 |                                                            |                                                                 |
| 1368542_at                                  | NM_053583   | 2       | <i>Zfp423</i>   | Zinc finger protein 423                                    | Transcriptional regulation of BMP signaling                     |
| 1372480_at                                  | BE117893    | 2       | <i>Zfp462</i>   | Zinc finger protein 462                                    | Zinc finger nuclear factor involved in cell division            |
| 1392913_at                                  | AA964151    | 2       | <i>Znf710</i>   | Zinc finger protein 710                                    | Zinc finger transcriptional factor                              |
| 1377454_at                                  | AW524041    | 3       | <i>Zhbx9</i>    | Zinc finger & btb domain containing 9                      | Zinc finger transcription factor                                |
| 1373315_at                                  | AI176425    | 3       | <i>Arnt2</i>    | Aryl-hydrocarbon receptor nuclear translocator 2           | bHLH-PAS transcription factor, xenobiotics metabolism           |
| 1377731_at                                  | AI454091    | 3       | <i>Cld</i>      | Cld nuclear receptor co-repressor                          | Potentiates transcriptional repression by NR1D1 & THRB          |
| 1389289_at                                  | AW534728    | 3       | <i>Evsr1</i>    | Ewing sarcoma breakpoint region 1                          | Transcriptional repressor & tumorigenesis                       |
| 1382390_at                                  | AI177572    | 3       | <i>Fubp3</i>    | Far upstream element binding protein 3                     | Interact with the far-upstream element                          |
| 1379550_a_at                                | BF290483    | 3       | <i>Gtf2rtd1</i> | Gtf2l repeat domain containing 1                           | Transcription regulator involved in cell-cycle progression      |
| 1369060_a_at                                | NM_053448   | 3       | <i>Hdac3</i>    | Histone deacetylase 3                                      | Epigenetic transcriptional regulation of cell cycle progression |
| 1370975_at                                  | AI172079    | 3       | <i>Kdm3a</i>    | Lysine-specific demethylase 3a                             | Histone demethylase & hormone-dependent transcription           |
| 1382152_at                                  | AI234336    | 3       | <i>Kdm5b</i>    | Lysine-specific demethylase 5b                             | Histone demethylase & corepressor for FOXG1B & PAX9             |
| 1374406_at                                  | AA925512    | 3       | <i>Khdac2</i>   | Keich domain containing 2                                  | Represses CREB3-mediated transcription                          |
| 1383863_at                                  | BF288303    | 3       | <i>Lmo2</i>     | Lim domain only 2                                          | Transcription factor regulating angiogenesis                    |
| 1390445_at                                  | BE114154    | 3       | <i>Mbd1</i>     | Mbt domain containing 1                                    | Transcriptional Repression by chromatin remodeling              |
| 1391474_at                                  | AA858511    | 3       | <i>Med14</i>    | Mediator complex subunit 14                                | Coactivator of RNA polymerase II-dependent gene expression      |
| 1383237_at                                  | BE098240    | 3       | <i>Myonin</i>   | Myoneurin                                                  | BTB/POZ-ZF transcription factor                                 |
| 1372772_at                                  | BM385098    | 3       | <i>Nfat5</i>    | Nuclear factor of activated T-cells 5, tonicity-responsive | Regulation of gene expression induced by osmotic stress         |
| 1383064_at                                  | AI137878    | 3       | <i>Pbx1</i>     | Pre-b-cell leukemia homeobox 1                             | Transcriptional activator of PF4                                |
| 1374032_at                                  | AA998886    | 3       | <i>Phf12</i>    | Phd finger protein 12                                      | Histone deacetylase & transcription repressor                   |
| 1390221_at                                  | BM385216    | 3       | <i>Prdm1</i>    | Pr domain containing 1, with znf domain                    | Repressor of $\beta$ -interferon gene expression.               |
| 1397343_at                                  | BE113258    | 3       | <i>Prdm16</i>   | Pr domain containing 16                                    | Transcriptional repressor of TGF- $\beta$ signaling             |
| 1383349_at                                  | BE115594    | 3       | <i>Rfx5</i>     | Regulatory factor x, 5                                     | Transcription activation from class II MHC promoters            |
| 1379626_at                                  | AA946353    | 3       | <i>Satb1</i>    | Satb homeobox 1                                            | Global chromatin organizer & transcription factor               |
| 1383806_at                                  | BF556825    | 3       | <i>Smarca1</i>  | Swi/snf related, actin dependent regulator of chromatin e1 | Component of the chromatin remodeling complex SWI/SNF           |
| 1372938_at                                  | AI575671    | 3       | <i>*Smorce1</i> | Swi/snf related, actin dependent regulator of chromatin e2 | Component of the chromatin remodeling complex SWI/SNF           |
| 1373808_at                                  | BF417211    | 3       | <i>*Tead1</i>   | Tea domain family 1                                        | Transcription factor that binds to SPH & GT-1C "enhancers"      |
| 1389287_at                                  | BI279573    | 3       | <i>*Tead1</i>   | Tea domain family 1                                        | Transcription factor that binds to SPH & GT-1C "enhancers"      |
| 1379439_at                                  | AA850609    | 3       | <i>Zhbx44</i>   | Zinc finger & btb domain containing 44                     | Zinc finger transcription factor                                |

\* Genes represented by multiple probe sets

**Table S2. Detailed functional categorizations of probe sets showing circadian oscillations in expression**

| Probe ID                                    | Accession # | Cluster | Symbol                         | Gene name                                               | Function                                                                |
|---------------------------------------------|-------------|---------|--------------------------------|---------------------------------------------------------|-------------------------------------------------------------------------|
| <i>Transcription/translation regulation</i> |             |         |                                |                                                         |                                                                         |
| 1374189_at                                  | BG668883    | 3       | <i>Zfp219</i>                  | Zinc finger protein 219                                 | Zinc finger transcription factor involved in development                |
| 1391255_at                                  | BE110035    | 3       | <i>Zmynd15</i>                 | Zinc finger, mynd-type containing 15                    | Histone deacetylase-dependent transcriptional repressor                 |
| 1372346_at                                  | AI230729    | 3       | <i>Znf513</i>                  | Zinc finger protein 513                                 | Zinc finger transcription factor                                        |
| 1372193_at                                  | AI408713    | 3       | <i>Impact</i>                  | Imprinted & ancient                                     | Translation regulation under amino acid starvation                      |
| 1373477_at                                  | BM1390306   | 3       | <i>Mtph19</i>                  | Mitochondrial ribosomal protein I19                     | Protein synthesis within the mitochondrion                              |
| 1371859_at                                  | D86655      | 3       | <i>Poldip3</i>                 | Polymerase $\delta$ interacting protein 3               | Regulation of translation                                               |
| 1373364_at                                  | BI294767    | 3       | <i>Ejfg3</i>                   | Eukaryotic translation initiation factor 4 $\gamma$ , 3 | Recruitment of mRNA to the ribosome                                     |
| 1373287_at                                  | BE113298    | 4       | <i>Atoh8</i>                   | Atonal homolog 8                                        | Transcription factor involved in cell differentiation                   |
| 1367602_at                                  | AI013390    | 4       | <i>Cited2</i>                  | Chp/p300-interacting transactivator, 2                  | Interferes with binding of transcription factors HIF-1 $\alpha$ & STAT2 |
| 1383447_at                                  | AI101323    | 4       | <i>Etv5</i>                    | Ets variant 5                                           | Surfactant C transcription & lung development                           |
| 1382647_at                                  | BF290662    | 4       | <i>Eya4</i>                    | Eyes absent homolog 4                                   | Transcription regulation during organogenesis                           |
| 1379405_at                                  | AI235642    | 4       | <i>Grhl1</i>                   | Glucocorticoid receptor dna binding factor 1            | Represses transcription of the glucocorticoid receptor                  |
| 1370816_at                                  | M25804      | 4       | <i>Nr1d1</i>                   | Nuclear receptor subfamily 1, group d, 1                | Circadian rhythm, Nuclear hormone receptor                              |
| 1382141_at                                  | BI291928    | 4       | <i>Seah1</i>                   | Set domain, bifurcated 1                                | Histone methyltransferase                                               |
| 1389340_at                                  | BI294227    | 4       | <i>Zfp318</i>                  | Zinc finger protein 318                                 | Repressed AR-mediated transcriptional activation                        |
| 1380810_at                                  | BE102637    | 4       | <i>Zfp40</i>                   | Zinc finger protein 689                                 | Zinc finger transcriptional factor                                      |
| 1393640_at                                  | BF542956    | 4       | <i>Zfp689</i>                  | Rna binding motif protein 3                             | Zinc finger transcriptional factor                                      |
| 1371583_at                                  | AI598399    | 4       | <i>Rbm3</i>                    | Hmg-box transcription factor 1                          | Phosphorylation of translation initiation factors                       |
| 1368549_at                                  | NM_013221   | 5       | <i>Hbp1</i>                    | Hmg-box transcription factor 1                          | Transcriptional repressor regulating Wnt pathway                        |
| 1371890_at                                  | AI172033    | 5       | <i>Rere</i>                    | Arginine-glutamic acid dipeptide repeats                | Transcriptional repressor controlling cell survival                     |
| 1379461_at                                  | BE120147    | 5       | <i>Zfp445</i>                  | Zinc finger protein 445                                 | Zinc finger transcriptional factor                                      |
| 1386097_at                                  | AW527230    | 6       | <i>%ankrd12</i>                | Ankyrin repeat domain 12                                | Recruit HDACs to p160 coactivators/nuclear receptor complex             |
| 1376341_at                                  | BM388895    | 6       | <i>%ankrd12</i>                | Ankyrin repeat domain 12                                | Recruit HDACs to p160 coactivators/nuclear receptor complex             |
| 1379483_at                                  | AI548256    | 6       | <i>Bhlhe40</i>                 | Basic helix-loop-helix family, c40                      | bHLH transcription factor: cell cycle & circadian rhythms               |
| 1373075_at                                  | BM390707    | 6       | <i>Cdk8</i>                    | Cyclin-dependent kinase 8                               | Coactivator of RNA polymerase II-dependent gene expression              |
| 1387343_at                                  | NM_013154   | 6       | <i>Cebp<math>\delta</math></i> | Ccaat/enhancer binding protein $\delta$                 | Transcriptional regulation of immune & inflammatory responses           |
| 1395318_at                                  | BF397354    | 6       | <i>Chd9</i>                    | Chromodomain helicase dna binding protein 9             | Transcriptional coactivator for PPAR $\alpha$                           |
| 1389402_at                                  | AI178746    | 6       | <i>Cxmp1</i>                   | Cysteine-serine-rich nuclear protein 1                  | Transcriptional activator involved in apoptosis                         |
| 1374349_at                                  | BE099937    | 6       | <i>Ctdspl</i>                  | Ctd small phosphatase-like                              | Negatively regulation of RNA polymerase II transcription                |

\* Genes represented by multiple probe sets



**Table S2. Detailed functional categorizations of probe sets showing circadian oscillations in expression**

| Probe ID                                    | Accession # | Cluster | Symbol        | Gene name                                         | Function                                                       |
|---------------------------------------------|-------------|---------|---------------|---------------------------------------------------|----------------------------------------------------------------|
| <i>Transcription/translation regulation</i> |             |         |               |                                                   |                                                                |
| 1387874_at                                  | AI230048    | 6       | <i>Dbp</i>    | D site of albumin promoter binding protein        | Modulates the expression of clock output genes                 |
| 1381149_at                                  | BI293484    | 6       | <i>Dnmt3a</i> | Dna -methyltransferase 3 a                        | Genome wide de novo methylation                                |
| 1383099_at                                  | BG670905    | 6       | <i>Gppp1</i>  | Gc-rich promoter binding protein 1                | GC-rich promoter-specific transactivating transcription factor |
| 1386080_at                                  | BE107815    | 6       | <i>Hey1</i>   | Hairy/enhancer-of-split related with yypw motif 1 | Downstream effector of Notch signaling                         |
| 1386641_at                                  | BF546770    | 6       | <i>Hlf</i>    | Hepatic leukemia factor                           | PAR-bZip transcription factor                                  |
| 1374709_at                                  | AI406795    | 6       | <i>Hlf</i>    | Hepatic leukemia factor                           | PAR-bZip transcription factor                                  |
| 1385585_at                                  | AI111674    | 6       | <i>Hlf</i>    | Hepatic leukemia factor                           | PAR-bZip transcription factor                                  |
| 1368249_at                                  | NM_053556   | 6       | <i>Klf15</i>  | Kruppel-like factor 15                            | Transcriptional activator that binds to CLCNKA promoter        |
| 1394039_at                                  | BM382886    | 6       | <i>Klf5</i>   | Kruppel-like factor 5                             | Transcription factor that binds EGFRE                          |
| 1385961_at                                  | BF561079    | 6       | <i>Klf5</i>   | Kruppel-like factor 5                             | Transcription factor that binds EGFRE                          |
| 1387060_at                                  | NM_031642   | 6       | <i>Klf6</i>   | Kruppel-like factor 6                             | Transcriptional activator in B-cell development                |
| 1395557_at                                  | BF565718    | 6       | <i>Klf6</i>   | Kruppel-like factor 6                             | Transcriptional activator in B-cell development                |
| 1370209_at                                  | BE101336    | 6       | <i>Klf9</i>   | Kruppel-like factor 9                             | Transcription factor that binds to GC box promoter elements    |
| 1371864_at                                  | AW524563    | 6       | <i>Klf9</i>   | Kruppel-like factor 9                             | Transcription factor that binds to GC box promoter elements    |
| 1388178_at                                  | AF322224    | 6       | <i>Ncoa3</i>  | Nuclear receptor coactivator 3                    | Coactivation of nuclear receptors                              |
| 1371202_a_at                                | AB012232    | 6       | <i>Nfb</i>    | Nuclear factor i/b                                | Capable of activating transcription & replication              |
| 1370541_at                                  | U20796      | 6       | <i>Nr1d2</i>  | Nuclear receptor subfamily 1, group d, 2          | Circadian rhythm, Steroid hormone receptor                     |
| 1370540_at                                  | U15660      | 6       | <i>Nr1d2</i>  | Nuclear receptor subfamily 1, group d, 2          | Circadian rhythm, Steroid hormone receptor                     |
| 1390430_at                                  | BF284190    | 6       | <i>Nr1d2</i>  | Nuclear receptor subfamily 1, group d, 2          | Circadian rhythm, Steroid hormone receptor                     |
| 1379982_at                                  | BE117278    | 6       | <i>Nrip1</i>  | Nuclear receptor interacting protein 1            | Modulates transcriptional regulation by steroid receptors      |
| 1374855_at                                  | BI279017    | 6       | <i>Per1</i>   | Period homolog 1                                  | Circadian rhythm, regulation of clock controlled genes         |
| 1378745_at                                  | BG374483    | 6       | <i>Per3</i>   | Period homolog 3                                  | Circadian rhythm, regulation of clock controlled genes         |
| 1388239_at                                  | AF311875    | 6       | <i>Per3</i>   | Period homolog 3                                  | Circadian rhythm, regulation of clock controlled genes         |
| 1379397_at                                  | BE106199    | 6       | <i>Rora</i>   | Rar-related orphan receptor a                     | Circadian rhythms, regulation of metabolism                    |
| 1388662_at                                  | BF392884    | 6       | <i>Rora</i>   | Rar-related orphan receptor a                     | Circadian rhythms, regulation of metabolism                    |
| 1385374_at                                  | AA997236    | 6       | <i>Tef</i>    | Thyrotroph embryonic factor                       | Transactivates the TSHB promoter                               |
| 1369919_at                                  | NM_019194   | 6       | <i>Tef</i>    | Thyrotroph embryonic factor                       | Transactivates the TSHB promoter                               |
| 1390819_at                                  | BF419374    | 6       | <i>Tef</i>    | Thyrotroph embryonic factor                       | Transactivates the TSHB promoter                               |
| 1376594_at                                  | AW524517    | 6       | <i>Tef1</i>   | Vascular endothelial zinc finger 1                | Transcriptional regulator of angiogenesis                      |

\* Genes represented by multiple probe sets

**Table S2. Detailed functional categorizations of probe sets showing circadian oscillations in expression**

| Probe ID                                    | Accession # | Cluster | Symbol           | Gene name                                           | Function                                                      |
|---------------------------------------------|-------------|---------|------------------|-----------------------------------------------------|---------------------------------------------------------------|
| <i>Transcription/translation regulation</i> |             |         |                  |                                                     |                                                               |
| 1392613_at                                  | AA942745    | 6       | <i>*Zhb16</i>    | Zinc finger & btb domain containing 16              | Transcription factor involved in cell cycle progression       |
| 1380306_at                                  | AW435415    | 6       | <i>*Zhb16</i>    | Zinc finger & btb domain containing 16              | Transcription factor involved in cell cycle progression       |
| 1373680_at                                  | AA800708    | 6       | <i>Zfp697</i>    | Zinc finger protein 697                             | Zinc finger transcriptional factor                            |
| 1372319_at                                  | BF282811    | 6       | <i>Zhx3</i>      | Zinc fingers & homeoboxes 3                         | Zinc finger transcriptional repressor                         |
| 1391507_at                                  | BF417765    | 6       | <i>Znf467</i>    | Zinc finger protein 467                             | Zinc finger transcriptional factor                            |
| 1387658_at                                  | U93849      | 6       | <i>*Ee2k</i>     | Eukaryotic elongation factor-2 kinase               | Phosphorylation of eukaryotic elongation factor-2             |
| 1369638_at                                  | NM_012947   | 6       | <i>*Ee2k</i>     | Eukaryotic elongation factor-2 kinase               | Phosphorylation of eukaryotic elongation factor-3             |
| 1392149_at                                  | AA997766    | 6       | <i>Ejfb</i>      | Eukaryotic translation initiation factor 4b         | Binding of mRNA to ribosomes                                  |
| 1385393_at                                  | BE099283    | 6       | <i>*Ppargc1a</i> | PPAR $\gamma$ coactivator 1 $\alpha$                | Transcriptional coactivator for steroid & nuclear receptors   |
| 1370089_at                                  | NM_031347   | 6       | <i>*Ppargc1a</i> | PPAR $\gamma$ coactivator 1 $\alpha$                | Transcriptional coactivator for steroid & nuclear receptors   |
| 1394721_at                                  | BF412697    | 7       | <i>Bac2a</i>     | Bromodomain adjacent to zinc finger domain, 2a      | Component of the nucleolar remodeling complex                 |
| 1385132_at                                  | A1044253    | 7       | <i>Mpb1</i>      | V-myb myeloblastosis viral oncogene homolog -like 1 | Transcription activator of B-lymphoid cell differentiation    |
| 1380638_at                                  | BI294907    | 6       | <i>*Vcoa3</i>    | Nuclear receptor coactivator 3                      | Coactivation of nuclear receptors                             |
| 1368303_at                                  | NM_031678   | 7       | <i>Per2</i>      | Period homolog 2                                    | Circadian rhythm, regulation of clock controlled genes        |
| 1369236_at                                  | NM_133312   | 7       | <i>Prdm4</i>     | Pr domain containing 4                              | Transcription factor involved in cell differentiation         |
| 1367771_at                                  | NM_031345   | 7       | <i>Tsc22d3</i>   | Tsc22 domain family, 3                              | Regulates anti-inflammatory effects of glucocorticoids & IL10 |
| <i>Metabolism</i>                           |             |         |                  |                                                     |                                                               |
| 1370363_at                                  | L46791      | 1       | <i>Ces3</i>      | Carboxylesterase 3                                  | Hydrolysis of amide & ester bonds                             |
| 1367729_at                                  | NM_022521   | 1       | <i>Out</i>       | Ornithine aminotransferase                          | Arginine & ornithine metabolism                               |
| 1373243_at                                  | BG378288    | 1       | <i>Pmvk</i>      | Phosphomevalonate kinase                            | Cholesterol biosynthesis                                      |
| 1372920_at                                  | A1411345    | 1       | <i>Prodh</i>     | Proline dehydrogenase 1                             | Proline degradation                                           |
| 1367668_a_at                                | NM_031841   | 1       | <i>Scd</i>       | Stearoyl-coa desaturase                             | Lipogenesis in lung                                           |
| 1389587_at                                  | BM384966    | 1       | <i>Umpps</i>     | Uridine monophosphate synthetase                    | De-novo pyrimidine biosynthesis                               |
| 1387101_at                                  | NM_053623   | 2       | <i>Acs14</i>     | Acyl-coa synthetase long-chain family 4             | Lipid biosynthesis & fatty acid degradation                   |
| 1377407_at                                  | BI290154    | 2       | <i>Acsm5</i>     | Acyl-coa synthetase medium-chain family 5           | Fatty acid metabolism                                         |
| 1372162_at                                  | A1176565    | 2       | <i>Acss1</i>     | Acyl-coa synthetase short-chain family 1            | Production of acetyl CoA & energy homeostasis                 |
| 1380636_at                                  | BM390144    | 2       | <i>Alox12</i>    | Arachidonate 12-lipoxygenase                        | Leukotriene metabolism                                        |
| 1378174_at                                  | BI274989    | 2       | <i>Arsi</i>      | Arylsulfatase family, i                             | Sulfate ester hydrolysis                                      |
| 1389021_at                                  | BF284746    | 2       | <i>Asnsd1</i>    | Asparagine synthetase domain containing 1           | Asparagine biosynthesis                                       |

\* Genes represented by multiple probe sets

**Table S2. Detailed functional categorizations of probe sets showing circadian oscillations in expression**

| Probe ID          | Accession # | Cluster | Symbol          | Gene name                                                | Function                                                         |
|-------------------|-------------|---------|-----------------|----------------------------------------------------------|------------------------------------------------------------------|
| <i>Metabolism</i> |             |         |                 |                                                          |                                                                  |
| 1370964_at        | BF283456    | 2       | <i>Ass1</i>     | Argininosuccinate synthase 1                             | Arginine biosynthesis & ammonia detoxification                   |
| 1388127_at        | AI170346    | 2       | <i>Cyp4b3</i>   | Cytochrome p450, family 4, subfamily v, 2                | Oxidation of fatty acid & steroid moieties                       |
| 1373240_at        | BI276935    | 2       | <i>Dhrs3</i>    | Dehydrogenase/reductase 3                                | Retinoids & steroids metabolism                                  |
| 1367905_at        | NM_019370   | 2       | <i>Enpp3</i>    | Ectonucleotide pyrophosphatase/phosphodiesterase 3       | Hydrolysis of extracellular nucleotides                          |
| 1370281_at        | U13253      | 2       | <i>Fabp5</i>    | Fatty acid binding protein 5                             | Synthesis of surfactant phospholipids                            |
| 1398514_at        | AI232328    | 2       | <i>Hgd</i>      | Homogenisate 1,2-dioxygenase                             | Phenylalanine catabolism                                         |
| 1376813_at        | BI295955    | 2       | <i>Lpcat3</i>   | Lysophosphatidylcholine acyltransferase 3                | Regulates membrane fluidity                                      |
| 1379081_at        | BE096731    | 2       | <i>Nox1</i>     | Nadph oxidase organizer 1                                | Generation of intracellular superoxides                          |
| 1369641_at        | AF016048    | 2       | <i>Pafah1b2</i> | Platelet-activating factor acetylhydrolase 1b, subunit 2 | Inactivation of platelet-activating factor                       |
| 1386864_at        | NM_053290   | 2       | <i>Pgam1</i>    | Phosphoglycerate mutase 1                                | Glycolysis pathway                                               |
| 1387058_at        | NM_017225   | 2       | <i>Pcp</i>      | Phosphatidylcholine transfer protein                     | Metabolism of pulmonary surfactants                              |
| 1379556_a_at      | AI105210    | 2       | <i>Gggs1</i>    | Geranylgeranyl diphosphate synthase 1                    | C20-prenylation of proteins                                      |
| 1373681_at        | AA799505    | 2       | <i>Mpi</i>      | Mannose phosphate isomerase                              | Synthesis of the GDP-mannose & dolichol-phosphate-mannose        |
| 1395536_at        | BG673248    | 3       | <i>Acp</i>      | Acid phosphatase, prostate                               | Orthophosphoric monoester metabolism                             |
| 1367720_at        | NM_012899   | 3       | <i>Alad</i>     | Aminolevulinatase, $\delta$ -, dehydratase               | Biosynthesis of tetrapyrroles                                    |
| 1368342_at        | NM_031544   | 3       | <i>Ampd3</i>    | Adenosine monophosphate deaminase 3                      | Energy metabolism                                                |
| 1376837_at        | BE109381    | 3       | <i>H6pd</i>     | Hexose-6-phosphate dehydrogenase                         | Oxidation of glucose & hexose 6 phosphate                        |
| 1371923_at        | BG380281    | 3       | <i>Lpcat1</i>   | Lysophosphatidylcholine acyltransferase 1                | Synthesize phosphatidylcholine in pulmonary surfactant           |
| 1371875_at        | BM388852    | 3       | <i>Manba</i>    | Mannosidase, $\beta$ a, lysosomal                        | Glycoprotein oligosaccharide catabolism                          |
| 1397644_at        | BI278369    | 3       | <i>Mup</i>      | Methylthioadenosine phosphorylase                        | Polyamine metabolism                                             |
| 1393508_at        | AI043805    | 3       | <i>Nox4</i>     | Nadph oxidase 4                                          | Generation of intracellular superoxides                          |
| 1389131_at        | BF412799    | 3       | <i>Nfyc1</i>    | 5'-nucleotidase, cytosolic iii-like                      | Nucleotidase & phosphotransferase                                |
| 1371978_at        | AI406375    | 3       | <i>Osbp19</i>   | Oxysterol binding protein-like 9                         | Lipid metabolism                                                 |
| 1377576_at        | AA891800    | 3       | <i>Ppa2</i>     | Pyrophosphatase 2                                        | Hydrolysis of pyrophosphate & phosphate metabolism               |
| 1377789_at        | AI145035    | 3       | <i>*Chs2</i>    | Carbohydrate sulfotransferase 2                          | Sulfation of N-acetylglucosamine                                 |
| 1375529_at        | BF404908    | 4       | <i>Cbr4</i>     | Carbonyl reductase 4                                     | Fatty acid biosynthesis                                          |
| 1386946_at        | NM_031559   | 4       | <i>Cpt1a</i>    | Carnitine palmitoyltransferase 1a                        | Fatty acid oxidation                                             |
| 1377369_at        | BF419070    | 4       | <i>Cybrd1</i>   | Cytochrome b reductase 1                                 | Reduction of iron cations & recycling of extracellular ascorbate |
| 1367900_at        | NM_031043   | 4       | <i>Gygi</i>     | Glycogenin 1                                             | Substrate for glycogen synthase                                  |

\* Genes represented by multiple probe sets

**Table S2. Detailed functional categorizations of probe sets showing circadian oscillations in expression**

| Probe ID          | Accession # | Cluster | Symbol         | Gene name                                           | Function                                                      |
|-------------------|-------------|---------|----------------|-----------------------------------------------------|---------------------------------------------------------------|
| <i>Metabolism</i> |             |         |                |                                                     |                                                               |
| 1377060_at        | AI410674    | 4       | <i>Mccc2</i>   | Methylcrotonyl-coenzyme a carboxylase 2             | Leucine catabolism                                            |
| 1393368_at        | BG372522    | 4       | <i>Osbpl5</i>  | Oxysterol binding protein-like 5                    | Lipid metabolism                                              |
| 1387896_at        | M62763      | 4       | <i>Scp2</i>    | Sterol carrier protein 2                            | Steroidogenesis                                               |
| 1373017_at        | AI237518    | 4       | <i>Suc6g2</i>  | Succinate-coa ligase, gdp-forming, $\beta$ subunit  | Succinate metabolism                                          |
| 1390523_at        | BG373402    | 4       | <i>*Chd2</i>   | Carbohydrate sulfotransferase 2                     | Sulfation of N-acetylglucosamine                              |
| 1372613_at        | AI232784    | 5       | <i>Bdh2</i>    | 3-hydroxybutyrate dehydrogenase, type 2             | Lipid & sterol synthesis                                      |
| 1380376_at        | BI290853    | 5       | <i>*Osbpl6</i> | Oxysterol binding protein-like 6                    | Lipid metabolism                                              |
| 1388558_at        | AI171802    | 6       | <i>Ak3</i>     | Adenylate kinase 3                                  | Adenine & guanine nucleotide homeostasis                      |
| 1367982_at        | NM_024484   | 6       | <i>Atas1</i>   | Aminolevulinatase, $\delta$ -, synthase 1           | Heme biosynthesis                                             |
| 1372615_at        | AI070137    | 6       | <i>Aoc3</i>    | Amine oxidase, copper containing 3                  | Oxidation of amines to aldehydes                              |
| 1369136_at        | NM_012542   | 6       | <i>Cyp2a3</i>  | Cytochrome p450, family 2, subfamily a, 3           | Hydroxylation of endogenous & exogenous compounds             |
| 1368304_at        | NM_053433   | 6       | <i>Fmo3</i>    | Flavin containing monooxygenase 3                   | Oxidation of drugs & xenobiotics                              |
| 1390141_at        | BF281848    | 6       | <i>Mhfdll</i>  | Methylenetetrahydrofolate dehydrogenase 1-like      | One-carbon folate metabolism                                  |
| 1384871_at        | AA901035    | 6       | <i>*Osbpl6</i> | Oxysterol binding protein-like 6                    | Lipid metabolism                                              |
| 1387109_at        | NM_031576   | 6       | <i>Por</i>     | P450 oxidoreductase                                 | Transfer of electrons from NADP to cytochrome P450 enzymes    |
| 1373923_at        | BF283756    | 6       | <i>Rdh10</i>   | Retinol dehydrogenase 10                            | All-trans-retinol to all-trans-retinal conversion             |
| 1369636_at        | BI285149    | 6       | <i>*Sord</i>   | Sorbitol dehydrogenase                              | Polyol pathway                                                |
| 1369635_at        | NM_017052   | 6       | <i>*Sord</i>   | Sorbitol dehydrogenase                              | Polyol pathway                                                |
| 1388271_at        | BM338331    | 6       | <i>Mt24</i>    | Metallothionein 2a                                  | Protection against oxidative stress                           |
| 1367755_at        | NM_052809   | 7       | <i>Cdo1</i>    | Cysteine dioxygenase, type 1                        | Taurine biosynthesis                                          |
| 1387214_at        | NM_031565   | 7       | <i>Cox1</i>    | Carboxylesterase 1                                  | Hydrolysis of amide & ester bonds                             |
| 1377635_at        | BM389350    | 7       | <i>*Fmo2</i>   | Flavin containing monooxygenase 2                   | Oxidation of drugs & xenobiotics                              |
| 1379467_at        | BF284065    | 7       | <i>*Fmo2</i>   | Flavin containing monooxygenase 2                   | Oxidation of drugs & xenobiotics                              |
| 1367774_at        | NM_031509   | 7       | <i>Gsta3</i>   | Glutathione s-transferase $\alpha$ 3                | Glutathione conjugation of endogenous compounds & xenobiotics |
| 1368991_at        | NM_053605   | 7       | <i>Snmpd3</i>  | Sphingomyelin phosphodiesterase 3, neutral membrane | Hydrolysis of sphingomyelin                                   |
| 1370019_at        | AF394783    | 7       | <i>Sult1a1</i> | Sulfotransferase family, cytosolic, 1a, 1           | Sulphate conjugation of endogenous compounds & xenobiotics    |
| 1368016_at        | NM_133299   | 8       | <i>Pecr</i>    | Peroxisomal trans-2-enoyl-coa reductase             | Chain elongation of fatty acids                               |
| 1378001_at        | AI548615    | UC      | <i>Dhrs9</i>   | Dehydrogenase/reductase 9                           | Retinoic acid biosynthesis                                    |

\* Genes represented by multiple probe sets

**Table S2. Detailed functional categorizations of probe sets showing circadian oscillations in expression**

| Probe ID                  | Accession # | Cluster | Symbol          | Gene name                                                  | Function                                                     |
|---------------------------|-------------|---------|-----------------|------------------------------------------------------------|--------------------------------------------------------------|
| <i>Protein processing</i> |             |         |                 |                                                            |                                                              |
| 1372103_at                | BM386931    | 1       | <i>DnaJ4</i>    | DnaJ homolog, subfamily a, 4                               | Protein folding & stability                                  |
| 1372298_at                | BE098766    | 1       | <i>Erp44</i>    | Endoplasmic reticulum protein 44                           | Folding of disulphide containing oligomeric proteins         |
| 1372701_at                | AI237597    | 1       | <i>Hsp90aa1</i> | Heat shock protein 90kDa $\alpha$ , class a 1              | Protein folding & stability                                  |
| 1388331_at                | BG057543    | 1       | <i>Hsp90b1</i>  | Heat shock protein 90kDa $\beta$ , 1                       | Protein folding & stability                                  |
| 1370283_at                | M14050      | 1       | <i>Hspa5</i>    | Heat shock 70kda protein 5                                 | Assembly of multimeric protein complexes inside the ER       |
| 1388898_at                | AI236601    | 1       | <i>*Hsph1</i>   | Heat shock 105kDa/110kda protein 1                         | Prevents the aggregation of denatured proteins               |
| 1385620_at                | BF525282    | 1       | <i>*Hsph1</i>   | Heat shock 105kDa/110kda protein 1                         | Prevents the aggregation of denatured proteins               |
| 1389688_at                | BM384373    | 1       | <i>Leprell1</i> | Leprecan-like 1                                            | Post-translational formation of 3-hydroxyproline in collagen |
| 1372364_a_at              | AA894101    | 1       | <i>Nnan1</i>    | N-terminal asparagine amidase                              | Ubiquitin-dependent turnover of intracellular proteins       |
| 1372704_at                | BE098941    | 1       | <i>Ostc</i>     | Oligosaccharyltransferase complex subunit                  | Cotranslational transfer of high-mannose sugars to proteins  |
| 1375663_at                | AI232346    | 1       | <i>Ube2f</i>    | Ubiquitin-conjugating enzyme e2f                           | Covalent attachment of NEDD8 to proteins                     |
| 1395267_at                | BM391972    | 2       | <i>Slgald1</i>  | Sl3 $\beta$ -galactoside $\alpha$ -2,3-sialyltransferase 1 | Transfer of sialic acid to galactose-containing proteins     |
| 1384285_at                | BI298096    | 2       | <i>March3</i>   | Membrane-associated ring finger 3                          | Membrane-bound E3 ubiquitin ligases                          |
| 1372152_at                | BI275874    | 2       | <i>Alg14</i>    | Asparagine-linked glycosylation 14 homolog                 | Involved in protein N-glycosylation                          |
| 1392422_at                | AI236397    | 2       | <i>Alg9</i>     | Asparagine-linked glycosylation 9                          | Mannose transfer to lipid-linked oligosaccharides            |
| 1372565_at                | BI274192    | 2       | <i>Htra3</i>    | Htra serine peptidase 3                                    | Serine protease, inhibitor of Tgf signaling                  |
| 1370859_at                | BI284965    | 2       | <i>Pdia6</i>    | Protein disulfide isomerase family a, 6                    | Folding of disulfide-bonded proteins                         |
| 1389519_at                | BI275955    | 2       | <i>Psmd8</i>    | Proteasome 26s subunit, non-appease, 8                     | Regulatory subunit of the 26S proteasome                     |
| 1388640_at                | BI279654    | 2       | <i>Smt3</i>     | Smt3 suppressor of mif two 3 homolog 3                     | Post-translational sumoylation of proteins                   |
| 1369943_at                | NM_019386   | 2       | <i>Tgm2</i>     | Transglutaminase 2                                         | Conjugation of polyamines to proteins                        |
| 1373578_at                | BM386413    | 2       | <i>*Trim2</i>   | Tripartite motif-containing 2                              | E3 ubiquitin ligase                                          |
| 1375278_at                | BG670916    | 2       | <i>*Trim2</i>   | Tripartite motif-containing 2                              | E3 ubiquitin ligase                                          |
| 1373087_at                | AI175452    | 3       | <i>March7</i>   | Membrane-associated ring finger 7                          | E3 ubiquitin ligase enhancing the E2 activity of HIP2        |
| 1388855_at                | BI284428    | 3       | <i>Cul1</i>     | Cullin 1                                                   | Component of SKP1-CUL1-F-box E3 ubiquitin ligase complexes   |
| 1378127_at                | BF420355    | 3       | <i>Cul2</i>     | Cullin 2                                                   | Component of ElonginB/C-CUL2/5-SOCS-box E3 ubiquitin ligase  |
| 1374001_at                | AA851818    | 3       | <i>Dcaf17</i>   | Ddb1 & cul4 associated factor 17                           | Substrate receptor for CUL4-DDB1 E3 ubiquitin ligase         |
| 1393843_at                | AI071911    | 3       | <i>Fem1b</i>    | Fem-1 homolog b                                            | Component of an E3 ubiquitin-protein ligase complex          |
| 1397764_at                | BG379719    | 3       | <i>Kat5</i>     | Potassium channel tetramerisation domain containing 5      | Adaptor for cullin3 ubiquitin ligases                        |
| 1383906_at                | BF416847    | 3       | <i>Neur3</i>    | Neutralized homolog 3                                      | E3 ubiquitin-protein ligase in alveolar cells                |

\* Genes represented by multiple probe sets

**Table S2. Detailed functional categorizations of probe sets showing circadian oscillations in expression**

| Probe ID                  | Accession # | Cluster | Symbol          | Gene name                                            | Function                                                          |
|---------------------------|-------------|---------|-----------------|------------------------------------------------------|-------------------------------------------------------------------|
| <i>Protein processing</i> |             |         |                 |                                                      |                                                                   |
| 1382385_at                | BE116344    | 3       | <i>Psmc6</i>    | Proteasome 26s subunit, atpase, 6                    | Component of 26S proteasome                                       |
| 1388538_at                | AI179646    | 3       | <i>Rbx1</i>     | Ring-box 1                                           | Component of the SCF & the CBC E3 ubiquitin ligase complex        |
| 1373298_at                | BI288011    | 3       | <i>Ubash3b</i>  | Ubiquitin associated & sh3 domain containing, b      | Inhibits degradation of receptor-type tyrosine kinases            |
| 1376862_at                | BI296848    | 3       | <i>Ube4b</i>    | Ubiquitination factor e4b                            | Catalyzes ubiquitin chain assembly                                |
| 1370524_at                | AW142720    | 3       | <i>Ube2d2</i>   | Ubiquitin-conjugating enzyme e2d 2                   | Ubiquitination of p53                                             |
| 1389230_at                | AA818910    | 3       | <i>Ardc3</i>    | Arrestin domain containing 3                         | Ubiquitination of the b2-adrenergic receptor                      |
| 1372270_at                | BM391270    | 3       | <i>Dpagt1</i>   | Dolichyl-phosphate GlcNAc phosphotransferase 1       | Glycoprotein biosynthesis                                         |
| 1375362_at                | BI304125    | 3       | <i>Syp12a</i>   | Signal peptide peptidase-like 2a                     | Intramembrane protease involved in ITMB2 processing               |
| 1388925_at                | AI171547    | 3       | <i>Sirt5</i>    | Sirtuin 5                                            | NAD-dependent protein deacetylase regulating blood ammonia        |
| 1385851_at                | AA925441    | 3       | <i>Capn5</i>    | Calpain 5                                            | Cystein protease involved in remodeling of cytoskeleton           |
| 1387781_at                | NM_022395   | 3       | <i>Pmpc6</i>    | Peptidase β                                          | Transit peptides cleavage from mitochondrial protein              |
| 1379422_at                | AI145871    | 4       | <i>Algl3</i>    | Asparagine-linked glycosylation 13 homolog           | Involved in protein N-glycosylation                               |
| 1373147_at                | AI145387    | 4       | <i>Fbx13</i>    | F-box & leucine-rich repeat protein 3                | Core component of SKP1-CUL-F-box E3 ubiquitin ligase complex      |
| 1367478_at                | AI600136    | 4       | <i>Htra2</i>    | Htra serine peptidase 2                              | Serine protease involved in apoptosis                             |
| 1371730_at                | BF418786    | 4       | <i>Lomp2</i>    | Lon peptidase 2, peroxisomal                         | Serine protease involved in peroxisome biogenesis                 |
| 1373775_at                | AI232313    | 4       | <i>Nub1</i>     | Negative regulator of ubiquitin-like proteins 1      | Negatively regulator of ubiquitin-like protein NEDD8              |
| 1374490_at                | AI177845    | 4       | <i>Trip12</i>   | Thyroid hormone receptor interactor 12               | Proteolytic activation of 20S proteasome                          |
| 1370099_at                | NM_022272   | 5       | <i>Fbx20</i>    | F-box & leucine-rich repeat protein 20               | Substrate recognition of the SCF type E3 ubiquitin ligase complex |
| 1388901_at                | AW534837    | 6       | <i>*Fklp5</i>   | Fk506 binding protein 5                              | Protein folding & trafficking                                     |
| 1380611_at                | BI284255    | 6       | <i>*Fklp5</i>   | Fk506 binding protein 5                              | Protein folding & trafficking                                     |
| 1375640_at                | AI236786    | 6       | <i>Fkbp9</i>    | Fk506 binding protein 9, 63 kda                      | Accelerated protein folding during synthesis                      |
| 1384501_at                | BI303932    | 6       | <i>Hecw2</i>    | Hect, e2 & ww domain containing 2                    | E3 ubiquitin ligase mediating ubiquitination of TP73              |
| 1367741_at                | NM_053523   | 6       | <i>Herpud1</i>  | Homocysteine & ER stress-inducible, ubiquitin-like 1 | ER-associated unfolded protein degradation                        |
| 1393813_at                | BF388771    | 6       | <i>Trc3</i>     | Tetrairicopeptide repeat domain 3                    | E3 ubiquitin-protein ligase                                       |
| 1375965_at                | AI229167    | 6       | <i>Ube2k</i>    | Ubiquitin-conjugating enzyme e2k                     | Ubiquitin-conjugation: degradation of abnormal proteins           |
| 1369754_a_at              | NM_053295   | 6       | <i>Cast</i>     | Calpastatin                                          | Inhibitor of calpain & protein degradation                        |
| 1377761_at                | BI296057    | 7       | <i>Gjpl2</i>    | Glutamine-fructose-6-phosphate transaminase 2        | Regulates N- & O-linked glycosylation of proteins                 |
| 1368792_at                | NM_019163   | 7       | <i>Psen1</i>    | Presenilin 1                                         | Cleavage of notch receptors                                       |
| 1368256_at                | NM_053779   | 7       | <i>Serpini1</i> | Serpin peptidase inhibitor, clade i, 1               | Serine protease inhibitor of plasminogen activators & plasmin     |

\* Genes represented by multiple probe sets

**Table S2. Detailed functional categorizations of probe sets showing circadian oscillations in expression**

| Probe ID                    | Accession # | Cluster | Symbol         | Gene name                                                | Function                                            |
|-----------------------------|-------------|---------|----------------|----------------------------------------------------------|-----------------------------------------------------|
| <i>Protein processing</i>   |             |         |                |                                                          |                                                     |
| 1387703_a_at                | AF106659    | 7       | <i>Usp2</i>    | Ubiquitin specific peptidase 2                           | Disassembly of the polyubiquitin chains             |
| 1367577_at                  | NM_031970   | 8       | <i>Hspb1</i>   | Heat shock 27kda protein 1                               | Stress resistance & actin reorganization            |
| 1399130_at                  | AW918690    | UC      | <i>Ptgy</i>    | Phosphatidylinositol glycan anchor biosynthesis, class y | production of GPI-anchors for cell surface proteins |
| <i>Cell cycle/Apoptosis</i> |             |         |                |                                                          |                                                     |
| 1374346_at                  | AA894233    | 2       | <i>Aifm2</i>   | Apoptosis-inducing factor, mitochondrion-associated, 2   | TP53/p53-dependent apoptosis                        |
| 1382993_at                  | AI236152    | 2       | <i>Bbc3</i>    | Bcl2 binding component 3                                 | Mediator of apoptosis                               |
| 1372160_at                  | BM389738    | 2       | <i>Bicap</i>   | Bladder cancer associated protein                        | Tumor suppressor gene, stimulates apoptosis         |
| 1380737_at                  | BF415834    | 2       | <i>Elmo2</i>   | Engulfment & cell motility 2                             | Phagocytosis of apoptotic cells                     |
| 1389322_at                  | A1013847    | 2       | <i>Plcd7</i>   | Programmed cell death 7                                  | Promotes apoptosis                                  |
| 1391077_at                  | AA851257    | 2       | <i>Clypn</i>   | Claspin homolog                                          | Cell cycle arrest after DNA damage                  |
| 1375546_at                  | A1009616    | 2       | <i>Fzr1</i>    | Fizzy/cell division cycle 20 related 1                   | Regulates mitotic progression                       |
| 1388395_at                  | A1406939    | 2       | <i>G0s2</i>    | G0/g1switch 2                                            | Oncogene, cell cycle regulation                     |
| 1390384_at                  | AA875257    | 2       | <i>H2afx</i>   | H2a histone family, x                                    | Condensation of nucleosome                          |
| 1389355_at                  | BF285187    | 2       | <i>Ier5</i>    | Immediate early response 5                               | Mitogenesis                                         |
| 1367890_at                  | NM_022522   | 3       | <i>Casp2</i>   | Caspase 2                                                | Apoptosis execution                                 |
| 1398340_at                  | A1317832    | 3       | <i>Candbpl</i> | Cyclin d-type binding-protein 1                          | Negative regulator of cell cycle progression        |
| 1389646_at                  | BE100584    | 3       | <i>Cdc23</i>   | Cell division cycle 23 homolog                           | Controls progression through mitosis & the G1 phase |
| 1367759_at                  | NM_012578   | 3       | <i>H1f0</i>    | H1 histone family, 0                                     | Condensation of nucleosome chains                   |
| 1388660_at                  | BI295915    | 3       | <i>Mexi1</i>   | Malignant t cell amplified sequence 1                    | Anti-oncogene, reduces cell doubling time           |
| 1368422_at                  | NM_017149   | 3       | <i>Meox2</i>   | Mesenchyme homeobox 2                                    | Vascular SM cell proliferation & differentiation    |
| 1398913_at                  | AI599394    | 3       | <i>Nuam1</i>   | Nuclear mitotic apparatus protein 1                      | Structural component of the nucleus                 |
| 1387795_at                  | NM_053480   | 3       | <i>Polc2</i>   | Polymerase, $\alpha$ 2                                   | Chromosomal DNA replication                         |
| 1399004_at                  | BM986309    | 3       | <i>Roma1</i>   | Reactive oxygen species modulator 1                      | Role in oxidative DNA damage                        |
| 1382175_at                  | AW534129    | 3       | <i>Wap</i>     | Wilms tumor 1 associated protein                         | Regulates G2/M cell-cycle transition                |
| 1388883_at                  | BF281976    | 3       | <i>Pold4</i>   | Polymerase, $\delta$ 4                                   | Regulates activity of DNA polymerase                |
| 1379495_at                  | BM388504    | 3       | <i>*Plxdc2</i> | Plexin domain containing 2                               | Mediator of apoptosis                               |
| 1379755_at                  | BE116194    | 4       | <i>*Plxdc2</i> | Plexin domain containing 2                               | Mediator of apoptosis                               |
| 1375945_at                  | BG375285    | 4       | <i>*Plxdc2</i> | Plexin domain containing 2                               | Mediator of apoptosis                               |
| 1371868_at                  | AA851386    | 4       | <i>Bcas2</i>   | Breast carcinoma amplified sequence 2                    | Negative regulator of apoptosis                     |

\* Genes represented by multiple probe sets

**Table S2. Detailed functional categorizations of probe sets showing circadian oscillations in expression**

| Probe ID                    | Accession # | Cluster | Symbol           | Gene name                                               | Function                                                    |
|-----------------------------|-------------|---------|------------------|---------------------------------------------------------|-------------------------------------------------------------|
| <i>Cell cycle/Apoptosis</i> |             |         |                  |                                                         |                                                             |
| 1389102_at                  | BG378147    | 4       | <i>Dock1</i>     | Dedicator of cytokinesis 1                              | Phagocytosis of apoptotic cells                             |
| 1377080_at                  | AI598730    | 4       | <i>Nradd</i>     | Neurotrophin receptor associated death domain           | Mediator of apoptosis                                       |
| 1374784_at                  | AI407006    | 4       | <i>Prf1cl</i>    | Phosphoribosyl transferase domain containing 1          | Tumor suppressor gene                                       |
| 1384163_at                  | BE103875    | 4       | <i>Trp53inp1</i> | Tumor protein p53 inducible nuclear protein 1           | Promotes p53/TP53 phosphorylation & apoptosis               |
| 1386895_at                  | NM_053409   | 4       | <i>Maged1</i>    | Melanoma antigen family d, 1                            | Inhibits cell proliferation                                 |
| 1372724_at                  | AI009727    | 4       | <i>Mll5</i>      | Myeloid/lymphoid or mixed-lineage leukemia 5            | Methylation of histones                                     |
| 1368120_at                  | NM_031069   | 5       | <i>Nell1</i>     | Nel-like 1                                              | Cell growth & differentiation                               |
| 1379449_at                  | BG670920    | 5       | <i>Rblcc1</i>    | Rb1-inducible coiled-coil 1                             | Cell growth, proliferation & apoptosis                      |
| 1376523_at                  | BF391127    | 6       | <i>*Arid4a</i>   | At rich interactive domain 4a                           | Interacts with retinoblastoma, regulates cell proliferation |
| 1379112_at                  | AW528085    | 6       | <i>*Arid4a</i>   | At rich interactive domain 4a                           | Interacts with retinoblastoma, regulates cell proliferation |
| 1372016_at                  | BI287978    | 6       | <i>Gadd45b</i>   | Growth arrest & dna-damage-inducible, $\beta$           | Regulation of growth & apoptosis                            |
| 1378544_at                  | BE117471    | 6       | <i>Rbbp6</i>     | Retinoblastoma binding protein 6                        | Suppress cell proliferation                                 |
| 1383597_at                  | AI072301    | 6       | <i>Dtre1c</i>    | Dna cross-link repair 1c                                | VJ recombination                                            |
| 1387121_a_at                | NM_133583   | 6       | <i>Ndrp2</i>     | Ndrp family, 2                                          | Dendritic cell differentiation                              |
| 1368080_at                  | NM_054008   | 6       | <i>Rgc32</i>     | Response gene to complement 32                          | Arrest of mitotic progression at the G2/M transition        |
| 1397409_s_at                | BE113999    | 6       | <i>Wee1</i>      | Wee1 homolog                                            | Regulates G2/M cell-cycle transition                        |
| 1381611_at                  | BF396355    | 7       | <i>Ahrf1</i>     | At hook containing transcription factor 1               | Regulation of mitosis & cytokinesis                         |
| 1398245_at                  | NM_031688   | 8       | <i>Sre-g</i>     | Synuclein, $\gamma$                                     | Regulation of mitosis                                       |
| 1395074_at                  | BI290959    | 8       | <i>Tag</i>       | Thymine-dna glycosylase                                 | Defence against genetic mutation                            |
| <i>Extracellular matrix</i> |             |         |                  |                                                         |                                                             |
| 1393060_at                  | AI059694    | 1       | <i>Adamts2</i>   | Adamts-like 2                                           | Glycoprotein that binds cell surface & ECM                  |
| 1392553_at                  | BF412281    | 1       | <i>Adamts5</i>   | Adamts-like 5                                           | Glycoprotein that binds cell surface & ECM                  |
| 1370927_at                  | BE108345    | 1       | <i>Col12a1</i>   | Collagen, type xii, $\alpha$ 1                          | Interacts with type I collagen fibrils                      |
| 1376457_at                  | AI175861    | 1       | <i>Crispld2</i>  | Cysteine-rich secretory protein tcl domain containing 2 | Promotes matrix assembly                                    |
| 1374529_at                  | AI406660    | 1       | <i>*Thbs1</i>    | Thrombospondin 1                                        | Cell attachment, invasion & cell-ECM interaction            |
| 1394109_at                  | BFS58056    | 1       | <i>*Thbs1</i>    | Thrombospondin 1                                        | Cell attachment, invasion & cell-ECM interaction            |
| 1391946_at                  | BI296054    | 2       | <i>Scp</i>       | Selectin p                                              | Receptor for carbohydrates on neutrophils & monocytes       |
| 1393730_at                  | BI277836    | 2       | <i>Adamts4</i>   | Adam metalloproteinase with thrombospondin 1, motif 4   | ECM protease involved in proteoglycans cleavage             |
| 1376481_at                  | BF416285    | 2       | <i>Adamts9</i>   | Adam metalloproteinase with thrombospondin 1, motif, 9  | ECM protease involved in proteoglycans cleavage             |

\* Genes represented by multiple probe sets



**Table S2. Detailed functional categorizations of probe sets showing circadian oscillations in expression**

| Probe ID                    | Accession # | Cluster | Symbol          | Gene name                                              | Function                                                |
|-----------------------------|-------------|---------|-----------------|--------------------------------------------------------|---------------------------------------------------------|
| <i>Extracellular matrix</i> |             |         |                 |                                                        |                                                         |
| 1391240_at                  | AI013954    | 2       | <i>Hs3st6</i>   | Heparan sulfate 3-O-sulfotransferase 6                 | Sulfurylation of heparan sulfate                        |
| 1382439_at                  | AI070686    | 2       | <i>Igfb6</i>    | Integrin, $\beta$ 6                                    | Receptor for fibronectin & cytotactin                   |
| 1370847_at                  | AA801238    | 3       | <i>Spon2</i>    | Spondin 2                                              | Pattern recognition molecule in ECM for microbes        |
| 1371429_at                  | BF281192    | 3       | <i>Dag1</i>     | Dysroglycan 1                                          | ECM receptor involved in ECM-cytoskeleton interaction   |
| 1388111_at                  | J04035      | 3       | <i>Eln</i>      | Elastin                                                | Structural component of elastic fibers                  |
| 1367860_a_at                | X83537      | 3       | <i>%Mmp14</i>   | Matrix metalloproteinase 14                            | Breakdown of ECM components                             |
| 1378225_at                  | AI176440    | 3       | <i>%Mmp14</i>   | Matrix metalloproteinase 14                            | Breakdown of ECM components                             |
| 1368428_at                  | NM_057155   | 3       | <i>Xmppe2</i>   | X-prolyl aminopeptidase 2, membrane-bound              | Hydrolase specific for ECM degradation components       |
| 1390931_at                  | AI704285    | 3       | <i>Adamts15</i> | Adam metalloproteinase with thrombospondin 1 motif, 15 | ECM protease that interacts with integrins              |
| 1374286_at                  | AA996836    | 3       | <i>Bhd7</i>     | Btb domain containing 7                                | Link between the ECM & cleft propagation                |
| 1382474_at                  | AA819747    | 3       | <i>Col13a1</i>  | Collagen, type xiii, $\alpha$ 1                        | Nonfibrillar collagen – branching morphogenesis of lung |
| 1368347_at                  | NM_021760   | 3       | <i>Col5a3</i>   | Collagen, type v, $\alpha$ 3                           | Interaction with heparan sulfate & thrombospondin       |
| 1372325_at                  | BI303596    | 3       | <i>Emilin1</i>  | Elastin microfibril interfacer 1                       | Formation of elastic fiber                              |
| 1368829_at                  | BM389019    | 3       | <i>Fbn1</i>     | Fibrillin 1                                            | Extracellular calcium binding – structural support      |
| 1379688_at                  | BM389813    | 3       | <i>Igqa4</i>    | Integrin, $\alpha$ 4                                   | Receptor for fibronectin                                |
| 1368172_a_at                | BI304009    | 3       | <i>*Lox</i>     | Lysyl oxidase                                          | Crosslinking of collagen & elastin                      |
| 1368171_at                  | NM_017061   | 3       | <i>*Lox</i>     | Lysyl oxidase                                          | Crosslinking of collagen & elastin                      |
| 1388902_at                  | AI599031    | 3       | <i>*Loxl1</i>   | Lysyl oxidase-like 1                                   | Crosslinking of collagen & elastin                      |
| 1380829_at                  | BM387795    | 3       | <i>*Loxl1</i>   | Lysyl oxidase-like 1                                   | Crosslinking of collagen & elastin                      |
| 1388618_at                  | BM389302    | 3       | <i>Nid2</i>     | Nidogen 2                                              | Cell-ECM interaction                                    |
| 1383348_at                  | BF545309    | 3       | <i>Nbsl</i>     | N-deacetylase/n-sulfotransferase 1                     | Biosynthesis of heparan sulphate                        |
| 1386529_at                  | BF564309    | 4       | <i>Cbe1</i>     | Collagen & calcium binding egf domains 1               | ECM remodeling & migration                              |
| 1393469_at                  | BE102340    | 4       | <i>CHI</i>      | Cell adhesion molecule with homology to Itcam          | Cell migration towards ECM                              |
| 1367866_at                  | NM_019153   | 4       | <i>Fbln5</i>    | Fibulin 5                                              | Interactions with integrins & vascular development      |
| 1392888_at                  | AI071251    | 4       | <i>Gpc4</i>     | Glypican 4                                             | Cell surface proteoglycan that bears heparan sulfate    |
| 1393672_at                  | BE117954    | 4       | <i>Hmnc1</i>    | Heminentin 1                                           | Organization of hemidesmosomes                          |
| 1373401_at                  | AI176034    | 4       | <i>Trc</i>      | Tenascin c                                             | Fiber associated structural protein                     |
| 1382481_a_at                | BG372422    | 5       | <i>Adam33</i>   | Adam metalloproteinase domain 33                       | ECM protease involved in cell matrix interaction        |
| 1371186_at                  | AA955091    | 6       | <i>Iga6</i>     | Integrin, $\alpha$ 6                                   | Receptor for laminin                                    |

\* Genes represented by multiple probe sets

**Table S2. Detailed functional categorizations of probe sets showing circadian oscillations in expression**

| Probe ID                    | Accession # | Cluster | Symbol          | Gene name                                             | Function                                                   |
|-----------------------------|-------------|---------|-----------------|-------------------------------------------------------|------------------------------------------------------------|
| <i>Extracellular matrix</i> |             |         |                 |                                                       |                                                            |
| 1392578_at                  | AI070875    | 6       | <i>Mgp</i>      | Matrix gla protein                                    | Inhibitory morphogen involved in vascular branching        |
| 1368223_at                  | NM_024400   | 6       | <i>Adams1</i>   | Adam metalloproteinase with thrombospondin 1 motif, 1 | ECM protease involved in proteoglycans cleavage            |
| 1380726_at                  | BI290633    | 7       | <i>Aspn</i>     | Asporin                                               | Proteoglycan involved in TGF & BMP signaling               |
| 1389836_a_at                | AI599265    | 7       | <i>*Timp3</i>   | Timp metalloproteinase inhibitor 3                    | Inhibits matrix metalloproteinases                         |
| 1368989_at                  | NM_012886   | 7       | <i>*Timp3</i>   | Timp metalloproteinase inhibitor 3                    | Inhibits matrix metalloproteinases                         |
| 1372926_at                  | AI009159    | 7       | <i>*Timp3</i>   | Timp metalloproteinase inhibitor 3                    | Inhibits matrix metalloproteinases                         |
| 1375138_at                  | AA893169    | 7       | <i>*Timp3</i>   | Timp metalloproteinase inhibitor 3                    | Inhibits matrix metalloproteinases                         |
| 1377632_at                  | AW251195    | 7       | <i>Timp4</i>    | Timp metalloproteinase inhibitor 4                    | Inhibits matrix metalloproteinases                         |
| 1373957_at                  | BF281544    | 8       | <i>Reln</i>     | Reelin                                                | ECM protease involved in cell adhesion & motility          |
| <i>Cytoskeleton</i>         |             |         |                 |                                                       |                                                            |
| 1388433_at                  | BI279605    | 1       | <i>Krt19</i>    | Keratin 19                                            | Structural support to epithelial cells                     |
| 1388921_at                  | BI279587    | 1       | <i>Krt80</i>    | Keratin 80                                            | Structural support to epithelial cells                     |
| 1374513_at                  | BM389104    | 2       | <i>Sept7</i>    | Septin 7                                              | Filament-forming cytoskeletal GTPase                       |
| 1368571_at                  | NM_021997   | 2       | <i>Clp2</i>     | Cap-gly domain containing linker protein 2            | Links microtubules to lamellar body                        |
| 1372777_at                  | BM385774    | 2       | <i>Fhbp11</i>   | Formin binding protein 1-like                         | Reorganization of actin cytoskeleton & membrane tubulation |
| 1378144_at                  | BI296384    | 2       | <i>Kank4</i>    | Kn motif & ankyrin repeat domains 4                   | Actin polymerization                                       |
| 1369637_at                  | NM_053486   | 2       | <i>Kif3c</i>    | Kinesin family 3c                                     | Microtubule-based anterograde translocator                 |
| 1378197_at                  | AW433953    | 2       | <i>Kifc2</i>    | Kinesin family c2                                     | Microtubule-dependent retrograde transport                 |
| 1372459_at                  | AW520792    | 2       | <i>Vasp</i>     | Vasodilator-stimulated phosphoprotein                 | Actin dynamics, cytoskeleton remodeling & cell migration   |
| 1373351_at                  | BI286775    | 3       | <i>Ank2</i>     | Ankyrin 2                                             | Integral membrane protein -cytoskeleton interaction        |
| 1384605_at                  | BF419162    | 3       | <i>Fnm4a</i>    | Ferm domain containing 4a                             | Junctional remodeling & epithelial polarity determination  |
| 1371940_at                  | AW920000    | 3       | <i>Macf1</i>    | Microtubule-actin crosslinking factor 1               | Cross-linking of cytoskeletal proteins                     |
| 1389448_at                  | AA800004    | 3       | <i>Sept4</i>    | Septin 4                                              | Filament-forming cytoskeletal GTPase                       |
| 1388874_at                  | BE113032    | 4       | <i>Mass1</i>    | Metastasis suppressor 1                               | Actin cytoskeleton interaction                             |
| 1375223_at                  | BI294737    | 4       | <i>*Phactr1</i> | Phosphatase & actin regulator 1                       | Actin cytoskeleton interaction                             |
| 1382303_at                  | AA996943    | 4       | <i>*Phactr1</i> | Phosphatase & actin regulator 1                       | Actin cytoskeleton interaction                             |
| 1373842_at                  | BM390718    | 5       | <i>Wasl</i>     | Wiskott-aldrich syndrome-like                         | Regulates actin polymerization                             |
| 1371046_at                  | AW920849    | 6       | <i>Sytn11</i>   | Spectrin, $\beta$ 1                                   | crosslinking of actin cytoskeleton                         |
| 1382512_at                  | AA850695    | 6       | <i>Rock2</i>    | Rho-associated, coiled-coil containing PK 2           | Formation of actin stress fibers & focal adhesions         |

\* Genes represented by multiple probe sets

**Table S2. Detailed functional categorizations of probe sets showing circadian oscillations in expression**

| Probe ID            | Accession # | Cluster | Symbol               | Gene name                                                  | Function                                                         |
|---------------------|-------------|---------|----------------------|------------------------------------------------------------|------------------------------------------------------------------|
| <i>Cytoskeleton</i> |             |         |                      |                                                            |                                                                  |
| 1392900_at          | AW888327    | UC      | <i>Capza1</i>        | Capping protein muscle z-line, $\alpha$ 1                  | Regulates growth of actin filament                               |
| 1373616_at          | BM386276    | UC      | <i>Sik</i>           | Src20-like kinase                                          | Mediates actin stress fiber dissolution                          |
| <i>Transport</i>    |             |         |                      |                                                            |                                                                  |
| 1398255_at          | NM_031672   | 1       | <i>Sic15a2/Pcpt2</i> | Solute carrier family 15, 2                                | Oligopeptide transport                                           |
| 1379366_a_at        | AW529938    | 2       | <i>Bspry</i>         | B-box & spry domain containing                             | Regulation of epithelial calcium transport                       |
| 1376214_at          | AA850788    | 2       | <i>Mnache</i>        | Methylmalonic aciduria cblc type, with homocystinuria      | Intracellular trafficking of cobalamin                           |
| 1370304_at          | AB006450    | 2       | <i>Timm17a</i>       | Translocase of inner mitochondrial membrane 17a            | Translocation of proteins across the mitochondrion               |
| 1369625_at          | AA891661    | 2       | <i>Aqp1</i>          | Aquaporin 1                                                | Fluid homeostasis                                                |
| 1375085_at          | BE112659    | 2       | <i>Sic25a35</i>      | Solute carrier family 25, 35                               | Mitochondrial transport of endogenous & exogenous compounds      |
| 1385456_at          | AA955079    | 2       | <i>Sic28a3</i>       | Solute carrier family 28, 3                                | Nucleoside transport                                             |
| 1398771_at          | NM_019283   | 2       | <i>Sic3a2</i>        | Solute carrier family 3, 2                                 | Neutral amino acid transport                                     |
| 1387808_at          | AF200684    | 2       | <i>Sic7a7</i>        | Solute carrier family 7, 7                                 | Dibasic & neutral amino acid transport                           |
| 1367939_at          | NM_012733   | 3       | <i>Rbp1</i>          | Retinol binding protein 1, cellular                        | Intracellular transport of retinol                               |
| 1398999_at          | BF283508    | 3       | <i>Star3</i>         | Star-related lipid transfer domain containing 3            | Cholesterol transport                                            |
| 1386770_x_at        | AW920063    | 3       | <i>Kcne2</i>         | Potassium voltage-gated channel, isk-related family, 2     | Epithelial electrolyte transport                                 |
| 1383247_a_at        | BI291029    | 3       | <i>Spns2</i>         | Spinster homolog 2                                         | Sphingolipid transporter                                         |
| 1395644_at          | BF386852    | 3       | <i>Ahca8</i>         | Atp-binding cassette, sub-family a, 8                      | ATP-dependent lipophilic drug transport                          |
| 1376036_at          | AI180408    | 3       | <i>Fhcr2</i>         | Feline leukemia virus subgroup c cellular receptor 2       | Transporter specific for calcium-chelator complex                |
| 1370973_at          | BF285019    | 3       | <i>Scn7a</i>         | Sodium channel, voltage-gated, type vii, $\alpha$          | voltage-dependent sodium ion transport                           |
| 1370516_at          | AB026665    | 3       | <i>Sic15a3</i>       | Solute carrier family 15, 3                                | Proton oligopeptide cotransport                                  |
| 1376860_at          | BE105713    | 3       | <i>Sic22a23</i>      | Solute carrier family 22, 23                               | Organic ions transport                                           |
| 1367950_at          | NM_019269   | 3       | <i>Sic22a5</i>       | Solute carrier family 22, 5                                | Organic cation transport                                         |
| 1376165_at          | BE098153    | 3       | <i>Sic24a3</i>       | Solute carrier family 24, 3                                | Transport of calcium & potassium ion in exchange for sodium ions |
| 1387970_at          | AF276870    | 3       | <i>Sic38a5</i>       | Solute carrier family 38, 5                                | Sodium-dependent amino acid transport                            |
| 1389089_at          | BM389027    | 3       | <i>Sic39a7</i>       | Solute carrier family 39, 7                                | Zinc transport                                                   |
| 1378131_at          | AI045015    | 3       | <i>Sic9a9</i>        | Solute carrier family 9, 9                                 | Organic ion homeostasis                                          |
| 1389613_at          | AI234712    | 4       | <i>App8a1</i>        | Atpase, aminophospholipid transporter, class i, type 8a, 1 | Transport of aminophospholipids                                  |
| 1368533_at          | NM_133304   | 4       | <i>Heph</i>          | Hephaestin                                                 | Iron transport                                                   |
| 1374885_at          | AI172278    | 4       | <i>Sic12a6</i>       | Solute carrier family 12, 6                                | Potassium-chloride cotransport                                   |

\* Genes represented by multiple probe sets

**Table S2. Detailed functional categorizations of probe sets showing circadian oscillations in expression**

| Probe ID                   | Accession # | Cluster | Symbol          | Gene name                                                 | Function                                                         |
|----------------------------|-------------|---------|-----------------|-----------------------------------------------------------|------------------------------------------------------------------|
| <i>Transport</i>           |             |         |                 |                                                           |                                                                  |
| 1394467_at                 | AI511367    | 6       | <i>Ctcf5</i>    | Chloride channel 5                                        | Lung chloride secretion                                          |
| 1369500_at                 | NM_021688   | 6       | <i>Kcni1</i>    | Potassium channel, subfamily k, 1                         | Inward rectifying potassium channel                              |
| 1387310_at                 | NM_134462   | 6       | <i>Atp2c2</i>   | Atpase, ca <sup>++</sup> transporting, type 2c, 2         | ATP coupled calcium transport                                    |
| 1390956_at                 | BI294909    | 6       | <i>Apol10a</i>  | Apolipoprotein 1 10a                                      | Lipid transport                                                  |
| 1376265_at                 | AI411542    | 6       | <i>Stap2</i>    | Six transmembrane epithelial antigen of the prostate 2    | cellular uptake of iron & copper                                 |
| 1384469_at                 | AI502224    | 6       | <i>Abca5</i>    | Atp-binding cassette, sub-family a, 5                     | Intracellular sterol & steroid transport                         |
| 1373282_at                 | AI406494    | 6       | <i>Slc25a33</i> | Solute carrier family 25, 33                              | Mitochondrial transporter in dendritic cell endocytosis          |
| 1384756_at                 | BF394311    | 6       | <i>Slc43a2</i>  | Solute carrier family 43, 2                               | Neutral amino acid transport                                     |
| 1368778_at                 | NM_017206   | 6       | <i>*Slc6a6</i>  | Solute carrier family 6, 6                                | Transports of taurine & β-alanine                                |
| 1374531_at                 | AA926305    | 6       | <i>*Slc6a6</i>  | Solute carrier family 6, 6                                | Transports of taurine & β-alanine                                |
| 1367814_at                 | M14137      | 7       | <i>*Atp1b1</i>  | Atpase, na <sup>+</sup> /k <sup>+</sup> transporting, β 1 | ATP dependent sodium & potassium exchange                        |
| 1386937_at                 | AI232036    | 7       | <i>*Atp1b1</i>  | Atpase, na <sup>+</sup> /k <sup>+</sup> transporting, β 1 | ATP dependent sodium & potassium exchange                        |
| 1374251_at                 | AA893192    | 7       | <i>Kcni15</i>   | Potassium inwardly-rectifying channel, subfamily j, 15    | Inward rectifier potassium channels                              |
| 1376702_at                 | AI228307    | 7       | <i>Mcl1</i>     | Megalencephalic leukoencephalopathy with cysts 1          | Non-selective cation channel                                     |
| 1398635_at                 | BF565662    | 7       | <i>Slc10a6</i>  | Solute carrier family 10, 6                               | Transport of sulfoconjugated steroid hormones                    |
| <i>Vesicular transport</i> |             |         |                 |                                                           |                                                                  |
| 1373654_at                 | BM389254    | 1       | <i>Anxa8</i>    | Annexin a8                                                | Indirectly inhibits the thromboplastin-specific complex          |
| 1368928_at                 | NM_031786   | 2       | <i>Trim3</i>    | Tripartite motif-containing 3                             | Vesicular trafficking in association with the CART complex       |
| 1373024_at                 | BI296511    | 2       | <i>Aps3l</i>    | Adaptor-related protein complex 3, sigma 1 subunit        | Vesicles budding from the Golgi membrane                         |
| 1372317_at                 | AI177867    | 2       | <i>Ehd1</i>     | Eh-domain containing 1                                    | Early endocytic membrane fusion & membrane trafficking           |
| 1389319_at                 | AA800719    | 2       | <i>Ergic1</i>   | Endoplasmic reticulum-golgi intermediate compartment 1    | Transport between endoplasmic reticulum & Golgi                  |
| 1375438_at                 | AA964687    | 2       | <i>Gosr2</i>    | Golgi snap receptor complex 2                             | Protein transport from the cis/medial-Golgi to the trans-Golgi   |
| 1389073_at                 | AA851248    | 2       | <i>Reep4</i>    | Receptor accessory protein 4                              | Rab-mediated vesicle transport                                   |
| 1379732_at                 | AW920037    | 2       | <i>Sxc11</i>    | Syntaxin 11                                               | Protein transport between late endosomes & trans-Golgi network   |
| 1372512_at                 | BE113340    | 2       | <i>Sxc18</i>    | Syntaxin 18                                               | Targeting & fusion of Golgi-derived retrograde transport with ER |
| 1388556_at                 | BG381589    | 2       | <i>Sxc6</i>     | Syntaxin 6                                                | Degradation of CFTR                                              |
| 1371791_at                 | AI227937    | 2       | <i>Surf4</i>    | Surfeit 4                                                 | Maintenance of ER-Golgi intermediate compartment & Golgi         |
| 1370332_at                 | AF159356    | 2       | <i>Unc13d</i>   | Unc-13 homolog d                                          | Cytotoxic granule exocytosis in lymphocytes & muscin secretion   |
| 1388519_at                 | BI281906    | 2       | <i>Sec61b</i>   | Sec61 β subunit                                           | Protein translocation in the endoplasmic reticulum               |

\* Genes represented by multiple probe sets

**Table S2. Detailed functional categorizations of probe sets showing circadian oscillations in expression**

| Probe ID                   | Accession # | Cluster | Symbol          | Gene name                                               | Function                                                               |
|----------------------------|-------------|---------|-----------------|---------------------------------------------------------|------------------------------------------------------------------------|
| <i>Vesicular transport</i> |             |         |                 |                                                         |                                                                        |
| 1393000_at                 | AI045970    | 3       | <i>Amph</i>     | Amphiphysin                                             | Regulation of exocytosis                                               |
| 1376239_at                 | BF283053    | 3       | <i>Atp6v1c2</i> | Atpase, h+ transporting, lysosomal 42kda, v1 subunit c2 | Intracellular compartments acidification in cells; protein trafficking |
| 1388838_at                 | AA943752    | 3       | <i>Chmp4b</i>   | Chromatin modifying protein 4b                          | Core component of ESCRT-III for sorting of cargo proteins              |
| 1374045_at                 | AI598851    | 3       | <i>Cog8</i>     | Component of oligomeric golgi complex 8                 | Intracellular membrane trafficking & glycoprotein modification         |
| 1375163_at                 | BI275870    | 3       | <i>Rab11b</i>   | Rab11b, ras oncogene family1                            | Membrane delivery during cytokinesis                                   |
| 1369092_at                 | NM_057147   | 3       | <i>Sec22a</i>   | Sec22 vesicle trafficking protein homolog a             | Vesicle transport between the ER & the Golgi complex                   |
| 1389138_at                 | AA945574    | 3       | <i>Sec22b</i>   | Sec22 vesicle trafficking protein homolog b             | ER-Golgi protein trafficking                                           |
| 1380639_at                 | BI296446    | 3       | <i>Stax5</i>    | Syntaxin 5                                              | Vesicle transport between the ER & the Golgi complex                   |
| 1390107_at                 | BG670294    | 3       | <i>Syt2</i>     | Synaptotagmin-like 2                                    | Cytotoxic granule exocytosis in lymphocytes                            |
| 1371651_at                 | BI295882    | 3       | <i>Vps25</i>    | Vacuolar protein sorting 25 homolog                     | Endocytosis of ubiquitinated membrane proteins                         |
| 1388892_at                 | BF395178    | 3       | <i>Rab2b</i>    | Rab2b, ras oncogene family                              | Protein transport from the ER to the Golgi complex                     |
| 1371769_at                 | BI279666    | 3       | <i>Scamp2</i>   | Secretory carrier membrane protein 2                    | Post-Golgi recycling pathways                                          |
| 1385158_at                 | BI301125    | 4       | <i>Chmp1b</i>   | Chromatin modifying protein 1b                          | Component of ESCRT-III                                                 |
| 1368538_at                 | NM_022691   | 4       | <i>Exoc7</i>    | Exocyst complex component 7                             | Docking of exocytic vesicles with fusion sites on plasma membrane      |
| 1375523_at                 | BE108178    | 4       | <i>Murks</i>    | Myristoylated alanine-rich PKC substrate                | Mucin secretion                                                        |
| 1393933_at                 | AW144823    | 4       | <i>*Sor1</i>    | Sortilin-related receptor, 1 a repeats-containing       | Uptake of lipoproteins & proteases                                     |
| 1377457_a_at               | AA850618    | 4       | <i>*Sor1</i>    | Sortilin-related receptor, 1 a repeats-containing       | Uptake of lipoproteins & proteases                                     |
| 1393626_at                 | BF562507    | 4       | <i>*Sor1</i>    | Sortilin-related receptor, 1 a repeats-containing       | Uptake of lipoproteins & proteases                                     |
| 1384863_at                 | AW534032    | 6       | <i>Cpne7</i>    | Copine 7                                                | Calcium-dependent phospholipid binding & membrane trafficking          |
| 1390603_at                 | AA956317    | 6       | <i>Snap1</i>    | Stromal membrane-associated protein 1                   | Clathrin-dependent endocytosis                                         |
| 1392648_at                 | BI294018    | 7       | <i>Mrc1</i>     | Mannose receptor, c type 1                              | Endocytosis of glycoproteins by macrophages                            |
| <i>mRNA Processing</i>     |             |         |                 |                                                         |                                                                        |
| 1371505_at                 | BG381750    | 1       | <i>Hmnpce</i>   | Heterogeneous nuclear ribonucleoprotein c               | Spliceosome assembly & mRNA splicing                                   |
| 1392111_at                 | AW435086    | 2       | <i>Exosc3</i>   | Exosome component 3                                     | Degradation of unstable mRNA                                           |
| 1389867_at                 | BI281086    | 3       | <i>Celf2</i>    | Cugbp, elav-like family 2                               | Pre-mRNA alternative splicing & RNA editing                            |
| 1383115_at                 | AW522557    | 3       | <i>Csf2t</i>    | Cleavage stimulation factor, subunit 2, 64kda, tau      | mRNA polyadenylation                                                   |
| 1371362_at                 | BI285402    | 3       | <i>Ddx17</i>    | Dead box 17                                             | microRNA processing                                                    |
| 1376596_at                 | BI295847    | 3       | <i>Ddx42</i>    | Dead box 42                                             | ATP-dependent RNA helicase                                             |
| 1373905_at                 | AI178441    | 3       | <i>Hmnprr</i>   | Heterogeneous nuclear ribonucleoprotein r               | mRNA metabolism & transport                                            |

\* Genes represented by multiple probe sets

**Table S2. Detailed functional categorizations of probe sets showing circadian oscillations in expression**

| Probe ID                 | Accession # | Cluster | Symbol          | Gene name                                                    | Function                                    |
|--------------------------|-------------|---------|-----------------|--------------------------------------------------------------|---------------------------------------------|
| <i>mRNA Processing</i>   |             |         |                 |                                                              |                                             |
| 1369971_a_at             | AB046616    | 3       | <i>Hnrpd</i>    | Heterogeneous nuclear ribonucleoprotein d                    | Translation coupled mRNA turnover           |
| 1372810_at               | BF281256    | 3       | <i>Hnrpd1</i>   | Heterogeneous nuclear ribonucleoprotein d-like               | mRNA metabolism & transport                 |
| 1398873_at               | BI279608    | 3       | <i>Hnrpl</i>    | Heterogeneous nuclear ribonucleoprotein l                    | mRNA metabolism & transport                 |
| 1398356_at               | BF420718    | 3       | <i>Nud21</i>    | Nudix -type motif 21                                         | Pre-mRNA 3'-processing & mRNA transport     |
| 1371899_at               | AI102009    | 3       | <i>Pknox</i>    | PK, FEN-inducible double stranded rna dependent activator    | mRNA biogenesis                             |
| 1378291_at               | BF549558    | 3       | <i>Prpf39</i>   | Prp39 pre-mrna processing factor 39 homolog                  | Involved in pre-mRNA splicing               |
| 1377116_at               | BI301478    | 3       | <i>*Rnase1</i>  | Ribonuclease, rnase a family, 1                              | Cleavage of single & double str&ed RNA      |
| 1380425_at               | AI012859    | 3       | <i>*Rnase1</i>  | Ribonuclease, rnase a family, 1                              | Cleavage of single & double str&ed RNA      |
| 1379542_at               | BF522334    | 3       | <i>Snrpf</i>    | Small nuclear ribonucleoprotein f                            | mRNA 3'-end processing                      |
| 1390489_at               | BE108860    | 3       | <i>Syncrip</i>  | Synaptotagmin binding, cytoplasmic rna interacting protein   | Translation coupled mRNA turnover           |
| 1368228_at               | NM_031616   | 3       | <i>Znfx2</i>    | Zinc finger, ran-binding domain containing 2                 | Alternative splice-site selection           |
| 1382809_at               | AW921084    | 4       | <i>Cirbp</i>    | Cold inducible rna binding protein                           | mRNA stabilization during genotoxic stress  |
| 1373576_at               | BE107337    | 4       | <i>Cnot6</i>    | Cct4-not transcription complex, subunit 6                    | Poly nuclease involved in mRNA decay        |
| 1393432_a_at             | AA899840    | 4       | <i>Dlx36</i>    | Deah_box_36                                                  | Degradation & deadenylation of mRNA         |
| 1373195_at               | AW532485    | 4       | <i>Fus</i>      | Fused in sarcoma                                             | Pre-mRNA splicing & matured mRNA transport  |
| 1375612_at               | AA965147    | 4       | <i>*Hnrpaa1</i> | Heterogeneous nuclear ribonucleoprotein a1                   | Pre-mRNA packaging into hnRNP particles     |
| 1387872_at               | BF396270    | 4       | <i>*Hnrpaa1</i> | Heterogeneous nuclear ribonucleoprotein a1                   | Pre-mRNA packaging into hnRNP particles     |
| 1398797_at               | NM_057141   | 4       | <i>Hnrpdk</i>   | Heterogeneous nuclear ribonucleoprotein k                    | Nuclear metabolism of hnRNAs                |
| 1398773_at               | NM_130405   | 4       | <i>Klhlbs1</i>  | Kh domain containing, signal transduction associated 1       | mRNA nuclear transport & stability          |
| 1379597_at               | AI011037    | 4       | <i>Rsrc1</i>    | Arginine/serine-rich coiled-coil 1                           | Spliceosome assembly & mRNA splicing        |
| 1390234_at               | BE115465    | 4       | <i>Sf3b1</i>    | Splicing factor, 3b, subunit 1, 155kda                       | Spliceosome assembly & mRNA splicing        |
| 1370920_at               | AI102055    | 4       | <i>Srpk2</i>    | Sfrs PK2                                                     | Spliceosome assembly & trafficking          |
| 1372309_at               | BI296558    | 5       | <i>Luc7l2</i>   | Luc7-like 2                                                  | Recognition of non-consensus splice donor   |
| 1383496_at               | BM387466    | 6       | <i>Esrp1</i>    | Epithelial splicing regulatory protein 1                     | Epithelial cell specific splicing regulator |
| 1391561_at               | BE108893    | 6       | <i>Hnrmpu</i>   | Heterogeneous nuclear ribonucleoprotein u                    | Promotes mRNA stability                     |
| 1389521_at               | AI408553    | 6       | <i>Ivns1abp</i> | Influenza virus ns1a binding protein                         | RNA metabolism                              |
| 1373303_at               | BM383325    | 6       | <i>Sfrs2ip</i>  | Splicing factor, arginine/serine-rich 2, interacting protein | Pre-mRNA alternative splicing               |
| <i>Immune regulation</i> |             |         |                 |                                                              |                                             |
| 1390738_at               | BM385476    | 2       | <i>Bst2</i>     | Bone marrow stromal cell antigen 2                           | B-cell growth & activation                  |

\* Genes represented by multiple probe sets

**Table S2. Detailed functional categorizations of probe sets showing circadian oscillations in expression**

| Probe ID                 | Accession # | Cluster | Symbol            | Gene name                                          | Function                                                          |
|--------------------------|-------------|---------|-------------------|----------------------------------------------------|-------------------------------------------------------------------|
| <i>Immune regulation</i> |             |         |                   |                                                    |                                                                   |
| 1376574_at               | BI282932    | 2       | <i>Cd93</i>       | Cd93 molecule                                      | Phagocytosis & cell adhesion of immune cells                      |
| 1383152_at               | BF544427    | 2       | <i>Chidl1</i>     | Chitinase domain containing 1                      | Regulates Th2 immune response                                     |
| 1368200_at               | NM_134455   | 2       | <i>Cx3cl1</i>     | Chemokine ligand 1                                 | Chemotactic for T-cells & monocytes                               |
| 1370634_x_at             | D87927      | 2       | * <i>Cxcl3</i>    | Chemokine ligand 3                                 | Chemotactic for neutrophils                                       |
| 1388032_a_at             | D87927      | 2       | * <i>Cxcl3</i>    | Chemokine ligand 3                                 | Chemotactic for neutrophils                                       |
| 1368073_at               | NM_012591   | 2       | <i>Irf1</i>       | Interferon regulatory factor 1                     | Activator of interferon transcription                             |
| 1370928_at               | BI284739    | 2       | <i>Limgf</i>      | Lipopolysaccharide-induced tnf factor              | Regulates expression of inflammatory chemokines & cytokines       |
| 1387205_at               | NM_022921   | 2       | <i>Rtl-m3-1</i>   | Rtl class Ib, locus m3, gene 1                     | Antigen processing & presentation                                 |
| 1388792_at               | AI599423    | 2       | <i>Gadd45g</i>    | Growth arrest & dna-damage-inducible, γ            | Th cell activation & Th1-Th2 balance                              |
| 1393863_at               | AA999005    | 3       | <i>CD180</i>      | Cd180 molecule                                     | B cell survival & immune response to bacterial LPS                |
| 1389553_at               | BF393825    | 3       | <i>Clec4e3</i>    | C-type lectin domain family 4, a3                  | Cell interaction & adhesion in antigen presenting cells           |
| 1372042_at               | BI294844    | 3       | <i>Crtm3</i>      | Cklf-like marvel transmembrane domain containing 3 | Regulation of humoral immune response                             |
| 1389659_at               | AI230591    | 3       | <i>Clta2a</i>     | --                                                 | T-cell activation                                                 |
| 1388583_at               | BF283398    | 3       | <i>Cxcl12</i>     | Chemokine ligand 12                                | Chemotactic for T-cells & monocytes                               |
| 1381311_at               | BE100625    | 3       | <i>Emr1</i>       | Egf-like module containing receptor 1              | Macrophage & eosinophil-specific receptor                         |
| 1373864_at               | BM388810    | 3       | <i>Map4k4</i>     | Mitogen-activated PK kinase kinase kinase 4        | Regulator of inflammatory cytokines expression                    |
| 1390585_at               | AI169829    | 3       | <i>Mesp1</i>      | Mannan-binding lectin serine peptidase 1           | Complement pathway activation & pathogen recognition              |
| 1373153_at               | AI230720    | 3       | <i>Mog</i>        | Myelin oligodendrocyte glycoprotein                | Homophilic cell-cell adhesion                                     |
| 1391737_at               | AW526210    | 3       | <i>Ncf4</i>       | Neutrophil cytosolic factor 4                      | ROS production for Pathogen killing                               |
| 1384227_at               | AI044031    | 3       | <i>Ptpnk</i>      | Protein tyrosine phosphatase, receptor type, k     | Immune cell adhesion & T-cell development                         |
| 1373283_at               | BE113158    | 3       | <i>Timpo</i>      | Thymopoietin                                       | T-cell development & function                                     |
| 1383189_at               | AA818143    | 3       | <i>Tnfrsf10</i>   | Tumor necrosis factor superfamily, 10              | Immune cell development & response                                |
| 1372818_at               | BI284441    | 4       | <i>Colec12</i>    | Collectin sub-family 12                            | Recognition & phagocytosis of pathogens                           |
| 1373672_at               | BM384419    | 4       | * <i>Serpim69</i> | Serpin peptidase inhibitor, clade b, 9             | Granzyme B inhibitor                                              |
| 1373592_at               | AI407094    | 4       | * <i>Serpim69</i> | Serpin peptidase inhibitor, clade b, 9             | Granzyme B inhibitor                                              |
| 1370043_at               | NM_031753   | 6       | * <i>Alcam</i>    | Activated leukocyte cell adhesion molecule         | Cell adhesion & leukocyte activation                              |
| 1382294_at               | AI576111    | 6       | * <i>Alcam</i>    | Activated leukocyte cell adhesion molecule         | Cell adhesion & leukocyte activation                              |
| 1393917_at               | BF555488    | 7       | <i>Cd163</i>      | Cd163 molecule                                     | Scavenger receptor for Hb Hp, activated macrophage marker         |
| 1380055_at               | BI296368    | 7       | <i>IL34</i>       | Interleukin 34                                     | Stimulates differentiation & viability of monocytes & macrophages |

\* Genes represented by multiple probe sets

**Table S2. Detailed functional categorizations of probe sets showing circadian oscillations in expression**

| Probe ID      | Accession # | Cluster | Symbol         | Gene name                                          | Function                                          |
|---------------|-------------|---------|----------------|----------------------------------------------------|---------------------------------------------------|
| <i>Others</i> |             |         |                |                                                    |                                                   |
| 1373595_at    | BM385463    | 1       | <i>Tmem43</i>  | Transmembrane protein 43                           | Maintenance nuclear envelope structure            |
| 1376198_at    | BI303342    | 2       | <i>*Asam</i>   | Adipocyte-specific adhesion molecule               | Cell adhesion                                     |
| 1377639_at    | BI275896    | 2       | <i>*Asam</i>   | Adipocyte-specific adhesion molecule               | Cell adhesion                                     |
| 1398431_at    | BI294910    | 2       | <i>Car8</i>    | Carbonic anhydrase viii                            | Binds to intracellular IP3-gated Ca2+ channel     |
| 1372002_at    | AI411352    | 2       | <i>Gja1</i>    | Gap junction protein, $\alpha$ 1, 43kda            | Component of gap junctions                        |
| 1368473_at    | NM_019280   | 2       | <i>Gja5</i>    | Gap junction protein, $\alpha$ 5, 40kda            | Component of gap junctions                        |
| 1387145_at    | NM_017251   | 2       | <i>Gjb1</i>    | Gap junction protein, $\beta$ 1, 32kda             | Component of gap junctions                        |
| 1375908_at    | BI282616    | 2       | <i>Mpz2</i>    | Myelin protein zero-like 2                         | Homophilic cell-cell adhesion                     |
| 1379361_at    | BI273703    | 2       | <i>Pex11a</i>  | Peroxisomal biogenesis factor 11 $\alpha$          | Peroxisomal proliferation division                |
| 1376646_at    | BF285164    | 2       | <i>Popdc2</i>  | Poppye domain containing 2                         | Integrity of tight junctions                      |
| 1378181_at    | BI279714    | 2       | <i>Rpp40</i>   | Ribonuclease p/mrp 40kda subunit                   | Maturation of tRNA                                |
| 1376974_at    | BG381669    | 2       | <i>Ttc7</i>    | Tetratricopeptide repeat domain 7a                 | Protein-protein interaction                       |
| 1371516_at    | BM391834    | 2       | <i>Xpo7</i>    | Exportin 7                                         | Nuclear export of proteins                        |
| 1390255_at    | BG381583    | 3       | <i>*Abhim3</i> | Actin binding lim protein family, 3                | Scaffold protein involved in development & cancer |
| 1391570_at    | AI105070    | 3       | <i>*Abhim3</i> | Actin binding lim protein family, 3                | Scaffold protein involved in development & cancer |
| 1371614_at    | AI169001    | 3       | <i>Atg12</i>   | Autophagy related 12 homolog                       | Autophagy                                         |
| 1372056_at    | AI406687    | 3       | <i>Cntm6</i>   | Cklf-like marvel transmembrane domain containing 6 | Chemokine-like factor                             |
| 1390145_at    | AW524532    | 3       | <i>Dmxc12</i>  | Dmxc-like 2                                        | Scaffold protein for MADD & RAB3GA                |
| 1372463_at    | AI101084    | 3       | <i>Fchd2</i>   | Fch domain only 2                                  | Membrane remodeling                               |
| 1390901_at    | BF543355    | 3       | <i>Igsf10</i>  | Immunoglobulin superfamily, 10                     | Maintenance of osteochondroprogenitor cells pool  |
| 1379258_at    | AA998367    | 3       | <i>Kelch5</i>  | Kelch-like 5                                       | Actin binding                                     |
| 1383080_at    | BI292252    | 3       | <i>Lamp2</i>   | Lysosomal-associated membrane protein 2            | Autophagy                                         |
| 1372110_at    | BE113148    | 3       | <i>Limh1</i>   | Lim & calponin homology domains 1                  | Actin binding                                     |
| 1368964_at    | NM_030856   | 3       | <i>Lrrn3</i>   | Leucine rich repeat neuronal 3                     | Protein-protein interaction                       |
| 1389162_at    | BI277328    | 3       | <i>Nfu1</i>    | Nfu1 iron-sulfur cluster scaffold homolog          | Iron-sulfur cluster scaffold protein              |
| 1378753_at    | AI638971    | 3       | <i>Ocln</i>    | Occludin                                           | Formation & regulation of the tight junction      |
| 1371924_at    | BI274355    | 3       | <i>Olfml3</i>  | Olfactomedin-like 3                                | Secreted scaffold protein                         |
| 1373312_at    | BI295064    | 3       | <i>Prkdl</i>   | Paroxysmal nonkinesigenic dyskinesia               | Regulation of myofibrillogenesis                  |
| 1387064_at    | NM_017234   | 3       | <i>Pxmp3</i>   | Peroxisomal biogenesis factor 2                    | Biogenesis of peroxisomes                         |

\* Genes represented by multiple probe sets



**Table S2. Detailed functional categorizations of probe sets showing circadian oscillations in expression**

| Probe ID      | Accession # | Cluster | Symbol          | Gene name                                        | Function                                                        |
|---------------|-------------|---------|-----------------|--------------------------------------------------|-----------------------------------------------------------------|
| <i>Others</i> |             |         |                 |                                                  |                                                                 |
| 1375450_at    | BF403864    | 3       | <i>Sdccag1</i>  | Serologically defined colon cancer antigen 1     | Auto antigen                                                    |
| 1398988_at    | BE110642    | 3       | <i>Schl1</i>    | Sec13-like protein 1 like                        | Component of the nuclear pore complex                           |
| 1389395_at    | BI275654    | 3       | <i>Scpt1</i>    | Selenoprotein n, 1                               | Oxidative stress                                                |
| 1367550_a_at  | BI287742    | 3       | <i>*Tm2d1</i>   | Tm2 domain containing 1                          | Interaction with $\beta$ -APP42                                 |
| 1385338_a_at  | BF287928    | 3       | <i>*Tm2d1</i>   | Tm2 domain containing 1                          | Interaction with $\beta$ -APP42                                 |
| 1383680_at    | BG376339    | 3       | <i>Tmem132a</i> | Transmembrane protein 132a                       | Regulates cAMP-induced GFAP gene expression                     |
| 1372232_at    | AI170808    | 3       | <i>Wbp1</i>     | Ww domain binding protein 1                      | Protein-protein interaction                                     |
| 1399030_at    | AA809682    | 3       | <i>Wdr45</i>    | Wd repeat domain 45                              | Autophagy                                                       |
| 1383651_a_at  | AA964509    | 3       | <i>Wdr45l</i>   | Wdr45-like                                       | Interaction with phospholipids                                  |
| 1374509_at    | BI275722    | 3       | <i>Wip2</i>     | Wd repeat domain, phosphoinositide interacting 2 | Progression of organelles into autophagosomes                   |
| 1376711_at    | BG673439    | 4       | <i>Cldn11</i>   | Claudin 11                                       | Tight junction-specific obliteration of the intercellular space |
| 1381996_at    | BG666712    | 4       | <i>*Gpm6b</i>   | Glycoprotein m6b                                 | Cell-to-cell communication                                      |
| 1370389_at    | AB036421    | 4       | <i>*Gpm6b</i>   | Glycoprotein m6b                                 | Cell-to-cell communication                                      |
| 1373151_at    | AW252169    | 4       | <i>Lhfp</i>     | Lipoma hmgic fusion partner                      | Translocation-associated lipoma                                 |
| 1383224_at    | BF525012    | 4       | <i>Par6dbb</i>  | Par-6 partitioning defective 6 homolog $\beta$   | Formation of epithelial tight junctions                         |
| 1385274_at    | AW526381    | 4       | <i>Podtb19</i>  | Protocadherin $\beta$ 19                         | Cell adhesion                                                   |
| 1382480_at    | AI060139    | 5       | <i>Atnx2</i>    | Ataxin 2                                         | Interacts with polyribosomes                                    |
| 1374156_at    | BE108018    | 6       | <i>*Mpp5</i>    | Membrane protein, palmitoylated 5                | Tight junctions biogenesis in epithelial cells                  |
| 1376009_at    | BI300199    | 6       | <i>Crag5</i>    | Ctage family, 5                                  | Tumor antigen                                                   |
| 1376175_at    | BF283433    | 6       | <i>Glas</i>     | Glioblastoma amplified sequence                  | Associated with mitochondrial translation                       |
| 1382363_at    | AI072027    | 6       | <i>*Mpp5</i>    | Membrane protein, palmitoylated 5                | Tight junctions biogenesis in epithelial cells                  |
| 1397535_at    | BF555544    | 6       | <i>*Mpp5</i>    | Membrane protein, palmitoylated 5                | Tight junctions biogenesis in epithelial cells                  |
| 1384183_at    | AA996869    | 6       | <i>Mypip</i>    | Myosin via & rab interacting protein             | exocytosis of bacterial pathogens                               |
| 1385229_at    | AW524146    | 6       | <i>*Pcdh20</i>  | Protocadherin 20                                 | Calcium-dependent cell-adhesion                                 |
| 1376623_at    | AI409186    | 6       | <i>Tmem204</i>  | Transmembrane protein 204                        | Influence paracellular permeability                             |
| 1394834_at    | BF393831    | 6       | <i>Wdfp3</i>    | Wd repeat & fyve domain containing 3             | Autophagy                                                       |
| 1371818_at    | AW251204    | 6       | <i>Xpot</i>     | Exportin, trna                                   | Nuclear export of aminoacylated tRNAs                           |
| 1370991_at    | AF187814    | 7       | <i>Cml3</i>     | Camello-like protein 3                           | Cell adhesion                                                   |
| 1391208_at    | BG379836    | 7       | <i>*Pcdh20</i>  | Protocadherin 20                                 | Calcium-dependent cell-adhesion                                 |

\* Genes represented by multiple probe sets

**Table S2. Detailed functional categorizations of probe sets showing circadian oscillations in expression**

| Probe ID           | Accession # | Cluster | Symbol          | Gene name                                               | Function                                                         |
|--------------------|-------------|---------|-----------------|---------------------------------------------------------|------------------------------------------------------------------|
| <i>Others</i>      |             |         |                 |                                                         |                                                                  |
| 1388866_at         | AA799392    | 7       | <i>Sypn</i>     | Sarcospan                                               | Component of the dystrophin-glycoprotein complex                 |
| 1378252_at         | AI029745    | 8       | <i>Chodl</i>    | Chondrolectin                                           | Endocytosis of glycoproteins & exogenous sugar-bearing pathogens |
| 1378805_at         | BE104220    | 8       | <i>Cttn2</i>    | Contactin 2                                             | Cell adhesion                                                    |
| 1376470_at         | BG372703    | UC      | <i>Frbp4</i>    | Formin binding protein 4                                | Binds to Pro-Arg-rich cellular proteins                          |
| <i>EST/Unknown</i> |             |         |                 |                                                         |                                                                  |
| 1377940_at         | BF398271    | 1       | <i>*Fam101b</i> | Family with sequence similarity 101, b                  | ---                                                              |
| 1378168_at         | BG377391    | 1       | <i>*Fam101b</i> | Family with sequence similarity 101, b                  | ---                                                              |
| 1389085_at         | BI296359    | 1       | <i>*Fam101b</i> | Family with sequence similarity 101, b                  | ---                                                              |
| 1377695_at         | BF281135    | 1       | <i>*Sntn2</i>   | Smoothelin-like 2                                       | ---                                                              |
| 1385171_s_at       | BE115612    | 1       | <i>*Sntn2</i>   | Smoothelin-like 2                                       | ---                                                              |
| 1369076_at         | NM_021671   | 1       | <i>Tmem33</i>   | Transmembrane protein 33                                | ---                                                              |
| 1375088_at         | BF404846    | 1       | ---             | ---                                                     | ---                                                              |
| 1377917_at         | AI104595    | 1       | ---             | ---                                                     | ---                                                              |
| 1383642_at         | BG374114    | 1       | ---             | ---                                                     | ---                                                              |
| 1393075_at         | BF386199    | 1       | ---             | ---                                                     | ---                                                              |
| 1394101_at         | BE109260    | 1       | ---             | ---                                                     | ---                                                              |
| 1379833_at         | BE110171    | ---     | ---             | ---                                                     | ---                                                              |
| 1393197_at         | BG376055    | 2       | <i>Abhd8</i>    | Abhydrolase domain containing 8                         | ---                                                              |
| 1379333_at         | BI296377    | 2       | <i>Armcx6</i>   | Armadillo repeat containing, x-linked 6                 | ---                                                              |
| 1393119_at         | BM388725    | 2       | ---             | ---                                                     | ---                                                              |
| 1398024_at         | BE110250    | 2       | ---             | ---                                                     | ---                                                              |
| 1390843_at         | AI229827    | 2       | <i>Ccdc102a</i> | Coiled-coil domain containing 102a                      | ---                                                              |
| 1383312_at         | BF396751    | 2       | <i>Ccdc120</i>  | Coiled-coil domain containing 120                       | ---                                                              |
| 1374277_at         | BI289615    | 2       | <i>Ccnj1</i>    | Cyclin J-like                                           | ---                                                              |
| 1374416_at         | AI169330    | 2       | <i>Chchd8</i>   | Coiled-coil-helix-coiled-coil-helix domain containing 8 | ---                                                              |
| 1392739_a_at       | AI454794    | ---     | <i>Eqp1</i>     | Endonuclease/exonuclease/phosphatase family domain 1    | ---                                                              |
| 1376770_at         | BM389214    | 2       | <i>Ejhd1</i>    | E-F-h& domain family, d1                                | ---                                                              |
| 1398387_at         | AI009530    | 2       | <i>Fam198b</i>  | Family with sequence similarity 198, b                  | ---                                                              |
| 1373727_at         | BI275179    | ---     | <i>Fibin</i>    | Fin bud initiation factor homolog                       | ---                                                              |

\* Genes represented by multiple probe sets

**Table S2. Detailed functional categorizations of probe sets showing circadian oscillations in expression**

| Probe ID           | Accession # | Cluster | Symbol         | Gene name                                      | Function |
|--------------------|-------------|---------|----------------|------------------------------------------------|----------|
| <i>EST/Unknown</i> |             |         |                |                                                |          |
| 1372234_at         | AA800950    | 2       | <i>Lix1l</i>   | Lix1 homolog -like                             | ---      |
| 1379482_at         | B1283829    | 2       | <i>Tm6sfl</i>  | Transmembrane 6 superfamily 1                  | ---      |
| 1384388_at         | H34273      | 2       | <i>Tmed9</i>   | Transmembrane emp24 protein transport domain 9 | ---      |
| 1372935_at         | A1598550    | 2       | <i>Tmem119</i> | Transmembrane protein 119                      | ---      |
| 1390042_at         | A1071166    | 2       | <i>Tmem140</i> | Transmembrane protein 140                      | ---      |
| 1399092_at         | BG378899    | 2       | <i>Tmem39b</i> | Transmembrane protein 39b                      | ---      |
| 1371731_at         | A1408151    | 2       | ---            | ---                                            | ---      |
| 1372154_at         | AW521019    | 2       | ---            | ---                                            | ---      |
| 1372454_at         | BG378568    | 2       | ---            | ---                                            | ---      |
| 1372721_at         | A1175447    | 2       | ---            | ---                                            | ---      |
| 1373641_at         | B1301187    | 2       | ---            | ---                                            | ---      |
| 1374029_at         | A1229596    | 2       | ---            | ---                                            | ---      |
| 1375645_at         | A1408842    | 2       | ---            | ---                                            | ---      |
| 1375733_at         | AW520755    | 2       | ---            | ---                                            | ---      |
| 1376146_at         | B1282272    | 2       | ---            | ---                                            | ---      |
| 1376160_at         | BF408850    | 2       | ---            | ---                                            | ---      |
| 1376379_a_at       | AW252141    | 2       | ---            | ---                                            | ---      |
| 1377330_at         | BF411114    | 2       | ---            | ---                                            | ---      |
| 1378315_at         | A1045116    | 2       | ---            | ---                                            | ---      |
| 1379043_at         | B1284837    | 2       | ---            | ---                                            | ---      |
| 1379436_a_at       | AA945875    | 2       | ---            | ---                                            | ---      |
| 1381409_at         | AA963978    | 2       | ---            | ---                                            | ---      |
| 1381923_at         | A1454658    | 2       | ---            | ---                                            | ---      |
| 1382302_at         | A1044633    | 2       | ---            | ---                                            | ---      |
| 1382305_at         | A1236814    | 2       | ---            | ---                                            | ---      |
| 1382404_at         | BG669741    | 2       | ---            | ---                                            | ---      |
| 1382914_at         | AA924097    | 2       | ---            | ---                                            | ---      |
| 1384097_at         | A1146081    | 2       | ---            | ---                                            | ---      |
| 1385093_at         | BG379949    | 2       | ---            | ---                                            | ---      |

\* Genes represented by multiple probe sets

**Table S2. Detailed functional categorizations of probe sets showing circadian oscillations in expression**

| Probe ID           | Accession # | Cluster | Symbol           | Gene name                                | Function |
|--------------------|-------------|---------|------------------|------------------------------------------|----------|
| <i>EST/Unknown</i> |             |         |                  |                                          |          |
| 1385926_at         | BF550565    | 2       | ---              | ---                                      | ---      |
| 1390841_at         | BI290420    | 2       | ---              | ---                                      | ---      |
| 1391122_at         | BE110610    | 2       | ---              | ---                                      | ---      |
| 1392001_at         | AI232305    | 2       | ---              | ---                                      | ---      |
| 1392549_at         | AA875587    | 2       | ---              | ---                                      | ---      |
| 1393062_at         | BI275419    | 2       | ---              | ---                                      | ---      |
| 1393135_at         | BM390238    | 2       | ---              | ---                                      | ---      |
| 1393263_at         | AW522530    | 2       | ---              | ---                                      | ---      |
| 1394524_at         | AW921279    | 2       | ---              | ---                                      | ---      |
| 1395753_at         | BI274506    | 2       | ---              | ---                                      | ---      |
| 1396620_at         | BE111348    | 2       | ---              | ---                                      | ---      |
| 1397781_at         | BF414751    | 2       | ---              | ---                                      | ---      |
| 1397944_at         | BE096457    | 2       | ---              | ---                                      | ---      |
| 1398131_at         | BE096035    | 2       | ---              | ---                                      | ---      |
| 1393696_at         | AA818846    | 2       | ---              | ---                                      | ---      |
| 1389456_at         | BI296591    | 2       | ---              | ---                                      | ---      |
| 1371332_at         | AA848821    | 2       | ---              | ---                                      | ---      |
| 1390199_at         | BM389647    | 2       | ---              | ---                                      | ---      |
| 1371636_at         | BE104321    | 3       | <i>Ankrd13c</i>  | Ankyrin repeat domain 13c                | ---      |
| 1374615_at         | AI175668    | 3       | <i>Ankrd44</i>   | Ankyrin repeat domain 44                 | ---      |
| 1398894_at         | AI178763    | 3       | <i>Commf3</i>    | Comm domain containing 3                 | ---      |
| 1374355_at         | BI289733    | 3       | <i>Fam113b</i>   | Family with sequence similarity 113, b   | ---      |
| 1389007_at         | AI231799    | 3       | <i>Fam189a2</i>  | Family with sequence similarity 189, a2  | ---      |
| 1375346_at         | BI290002    | 3       | <i>Gm5617</i>    | ---                                      | ---      |
| 1398996_at         | AI1007987   | 3       | <i>Loc683402</i> | ---                                      | ---      |
| 1392301_at         | AI237897    | 3       | <i>Sh3cl</i>     | Sh3 domain & tetratricopeptide repeats 1 | ---      |
| 1383494_at         | BF414338    | 3       | <i>Srbdl</i>     | S1 rna binding domain 1                  | ---      |
| 1389656_at         | AA851945    | 3       | <i>Tspan-15</i>  | Tetraspanin 15                           | ---      |
| 1373524_at         | AA946482    | 3       | ---              | ---                                      | ---      |

\* Genes represented by multiple probe sets

**Table S2. Detailed functional categorizations of probe sets showing circadian oscillations in expression**

| Probe ID           | Accession # | Cluster | Symbol          | Gene name                                   | Function |
|--------------------|-------------|---------|-----------------|---------------------------------------------|----------|
| <i>EST/Unknown</i> |             |         |                 |                                             |          |
| 1374496_at         | BG380570    | 3       | ---             | ---                                         | ---      |
| 1376581_at         | AW433895    | 3       | ---             | ---                                         | ---      |
| 1378462_at         | BE107396    | 3       | ---             | ---                                         | ---      |
| 1381408_at         | BI275477    | 3       | ---             | ---                                         | ---      |
| 1381975_at         | BG371767    | 3       | ---             | ---                                         | ---      |
| 1382017_at         | A1012949    | 3       | ---             | ---                                         | ---      |
| 1390151_at         | BM392146    | 3       | ---             | ---                                         | ---      |
| 1390153_at         | BG378721    | 3       | ---             | ---                                         | ---      |
| 1391131_at         | BE112995    | 3       | ---             | ---                                         | ---      |
| 1373507_at         | A1232810    | 3       | <i>Acbd5</i>    | Acyl-coenzyme a binding domain containing 5 | ---      |
| 1372742_at         | A1410058    | 3       | <i>Ankmy2</i>   | Ankyrin repeat & mynd domain containing 2   | ---      |
| 1379669_at         | BI275651    | 3       | <i>Arhgap42</i> | Rho gtpase activating protein 42            | ---      |
| 1383246_at         | AI146111    | 3       | <i>Armc7</i>    | Armadillo repeat containing 7               | ---      |
| 1383422_at         | AW252401    | 3       | <i>Bend5</i>    | Ben domain containing 5                     | ---      |
| 1377194_a_at       | BE107471    | 3       | <i>Ccdc90b</i>  | Coiled-coil domain containing 90b           | ---      |
| 1372801_at         | AI171256    | 3       | <i>Commf10</i>  | Comm domain containing 10                   | ---      |
| 1379425_at         | A1549208    | 3       | <i>Dem1</i>     | Defects in morphology 1 homolog             | ---      |
| 1374400_at         | BI291528    | 3       | <i>Efr3a</i>    | Efr3 homolog a                              | ---      |
| 1372621_at         | AI179588    | 3       | <i>Fam176b</i>  | Family with sequence similarity 176, b      | ---      |
| 1388688_at         | BI296599    | 3       | <i>Fam190b</i>  | Family with sequence similarity 190, b      | ---      |
| 1388817_at         | BI284848    | 3       | <i>Fam63a</i>   | Family with sequence similarity 63, a       | ---      |
| 1383316_at         | BF409313    | 3       | <i>Hdde2</i>    | Hd domain containing 2                      | ---      |
| 1376861_at         | AW525240    | 3       | <i>Mospd1</i>   | Motile sperm domain containing 1            | ---      |
| 1395928_at         | BE102495    | 3       | ---             | ---                                         | ---      |
| 1367513_at         | BI284935    | 3       | <i>Tm9sf4</i>   | Transmembrane 9 superfamily protein 4       | ---      |
| 1374948_at         | BI275815    | 3       | <i>Tmem106a</i> | Transmembrane protein 106a                  | ---      |
| 1371634_at         | BE107851    | 3       | <i>Tmem126a</i> | Transmembrane protein 126a                  | ---      |
| 1374368_at         | BI291066    | 3       | <i>Tmem164</i>  | Transmembrane protein 164                   | ---      |
| 1375067_at         | AI555354    | 3       | <i>Tmem170b</i> | Transmembrane protein 170b                  | ---      |

\* Genes represented by multiple probe sets

**Table S2. Detailed functional categorizations of probe sets showing circadian oscillations in expression**

| Probe ID           | Accession # | Cluster | Symbol         | Gene name                                   | Function |
|--------------------|-------------|---------|----------------|---------------------------------------------|----------|
| <i>EST/Unknown</i> |             |         |                |                                             |          |
| 1376571_at         | BI28597     | 3       | <i>Tmem42</i>  | Transmembrane protein 42                    | ---      |
| 1372100_at         | BI283746    | 3       | <i>Tmem50a</i> | Transmembrane protein 50a                   | ---      |
| 1392683_at         | AW142773    | 3       | <i>Tmem71</i>  | Transmembrane protein 71                    | ---      |
| 1373248_at         | BI292079    | 3       | <i>Vsig10</i>  | V-set & immunoglobulin domain containing 10 | ---      |
| 1371666_at         | BM385852    | 3       | ---            | ---                                         | ---      |
| 1371999_at         | BI303641    | 3       | ---            | ---                                         | ---      |
| 1373651_at         | BE103440    | 3       | ---            | ---                                         | ---      |
| 1374106_at         | AI412389    | 3       | ---            | ---                                         | ---      |
| 1374322_at         | AA893980    | 3       | ---            | ---                                         | ---      |
| 1374544_at         | BM384374    | 3       | ---            | ---                                         | ---      |
| 1374717_at         | BI295624    | 3       | ---            | ---                                         | ---      |
| 1375649_at         | BF396469    | 3       | ---            | ---                                         | ---      |
| 1377790_at         | BE115859    | 3       | ---            | ---                                         | ---      |
| 1378081_at         | BI285065    | 3       | ---            | ---                                         | ---      |
| 1379359_at         | BF407675    | 3       | ---            | ---                                         | ---      |
| 1380318_at         | BF401102    | 3       | ---            | ---                                         | ---      |
| 1381043_at         | AI639256    | 3       | ---            | ---                                         | ---      |
| 1381316_at         | BF388256    | 3       | ---            | ---                                         | ---      |
| 1381491_at         | BE097634    | 3       | ---            | ---                                         | ---      |
| 1382211_at         | AI602542    | 3       | ---            | ---                                         | ---      |
| 1382252_at         | BE099808    | 3       | ---            | ---                                         | ---      |
| 1382328_at         | AW918029    | 3       | ---            | ---                                         | ---      |
| 1382436_at         | BM386497    | 3       | ---            | ---                                         | ---      |
| 1383058_at         | AI410438    | 3       | ---            | ---                                         | ---      |
| 1383611_at         | AI145497    | 3       | ---            | ---                                         | ---      |
| 1384481_at         | BG376273    | 3       | ---            | ---                                         | ---      |
| 1385798_at         | AW533857    | 3       | ---            | ---                                         | ---      |
| 1388412_at         | BI284376    | 3       | ---            | ---                                         | ---      |
| 1389782_at         | AI408993    | 3       | ---            | ---                                         | ---      |

\* Genes represented by multiple probe sets

**Table S2. Detailed functional categorizations of probe sets showing circadian oscillations in expression**

| Probe ID           | Accession # | Cluster | Symbol         | Gene name                                     | Function |
|--------------------|-------------|---------|----------------|-----------------------------------------------|----------|
| <i>EST/Unknown</i> |             |         |                |                                               |          |
| 1389805_at         | BF400933    | 3       | ---            | ---                                           | ---      |
| 1390517_at         | BM392260    | 3       | ---            | ---                                           | ---      |
| 1390743_at         | BF408616    | 3       | ---            | ---                                           | ---      |
| 1390907_at         | AI145039    | 3       | ---            | ---                                           | ---      |
| 1391338_at         | AI603449    | 3       | ---            | ---                                           | ---      |
| 1392023_at         | AW434002    | 3       | ---            | ---                                           | ---      |
| 1393227_at         | A1045138    | 3       | ---            | ---                                           | ---      |
| 1393309_at         | AI145786    | 3       | ---            | ---                                           | ---      |
| 1395994_at         | BE116471    | 3       | ---            | ---                                           | ---      |
| 1397217_at         | BF408757    | 3       | ---            | ---                                           | ---      |
| 1397713_at         | AW917120    | 3       | ---            | ---                                           | ---      |
| 1399157_at         | AA849312    | 3       | ---            | ---                                           | ---      |
| 1379703_at         | BF288207    | 4       | <i>Denn43</i>  | Denn/madd domain containing 3                 | ---      |
| 1383103_at         | BE110514    | 4       | <i>Fam172a</i> | Family with sequence similarity 172, a        | ---      |
| 1398727_at         | BF398091    | 4       | <i>Fam24a</i>  | Family with sequence similarity 24, a         | ---      |
| 1382266_at         | A1500893    | 4       | <i>Gpr146</i>  | G protein-coupled receptor 146                | ---      |
| 1393806_at         | BE107400    | 4       | <i>Mansc1</i>  | Mansc domain containing 1                     | ---      |
| 1369917_at         | NM_139259   | 4       | <i>Nradd</i>   | Neurotrophin receptor associated death domain | ---      |
| 1392670_at         | BF291168    | 4       | <i>Wwc2</i>    | Ww & c2 domain containing 2                   | ---      |
| 1371333_at         | AI180251    | 4       | ---            | ---                                           | ---      |
| 1372059_at         | AA891759    | 4       | ---            | ---                                           | ---      |
| 1372268_at         | BI294852    | 4       | ---            | ---                                           | ---      |
| 1372749_at         | A1009786    | 4       | ---            | ---                                           | ---      |
| 1373076_at         | A1411577    | 4       | ---            | ---                                           | ---      |
| 1373887_at         | BF523561    | 4       | ---            | ---                                           | ---      |
| 1374505_at         | A1411031    | 4       | ---            | ---                                           | ---      |
| 1374990_at         | A1233786    | 4       | ---            | ---                                           | ---      |
| 1375056_at         | AA943310    | 4       | ---            | ---                                           | ---      |
| 1376610_a_at       | BE109163    | 4       | ---            | ---                                           | ---      |

\* Genes represented by multiple probe sets

**Table S2. Detailed functional categorizations of probe sets showing circadian oscillations in expression**

| Probe ID           | Accession # | Cluster | Symbol | Gene name | Function |
|--------------------|-------------|---------|--------|-----------|----------|
| <i>EST/Unknown</i> |             |         |        |           |          |
| 1377238_at         | BM386889    | 4       | ---    | ---       | ---      |
| 1378540_at         | B1294763    | 4       | ---    | ---       | ---      |
| 1378814_at         | BF387902    | 4       | ---    | ---       | ---      |
| 1378998_at         | A1071538    | 4       | ---    | ---       | ---      |
| 1379085_at         | BF396507    | 4       | ---    | ---       | ---      |
| 1379382_at         | A1144865    | 4       | ---    | ---       | ---      |
| 1380180_at         | AW528635    | 4       | ---    | ---       | ---      |
| 1381027_at         | BF393571    | 4       | ---    | ---       | ---      |
| 1381058_at         | A1548492    | 4       | ---    | ---       | ---      |
| 1381535_at         | A1715442    | 4       | ---    | ---       | ---      |
| 1382820_at         | A1176342    | 4       | ---    | ---       | ---      |
| 1383919_at         | A1070704    | 4       | ---    | ---       | ---      |
| 1384216_at         | AW534148    | 4       | ---    | ---       | ---      |
| 1384486_at         | B1288961    | 4       | ---    | ---       | ---      |
| 1384717_at         | AA894199    | 4       | ---    | ---       | ---      |
| 1388446_at         | BF397834    | 4       | ---    | ---       | ---      |
| 1389150_at         | AW524559    | 4       | ---    | ---       | ---      |
| 1390187_at         | A1060043    | 4       | ---    | ---       | ---      |
| 1390463_at         | BG378294    | 4       | ---    | ---       | ---      |
| 1391325_at         | BF397406    | 4       | ---    | ---       | ---      |
| 1392618_at         | BG379597    | 4       | ---    | ---       | ---      |
| 1393019_at         | BG372243    | 4       | ---    | ---       | ---      |
| 1393025_at         | B1297354    | 4       | ---    | ---       | ---      |
| 1393334_at         | AW528448    | 4       | ---    | ---       | ---      |
| 1393898_at         | AA998222    | 4       | ---    | ---       | ---      |
| 1394726_at         | A1412564    | 4       | ---    | ---       | ---      |
| 1394766_at         | AW534610    | 4       | ---    | ---       | ---      |
| 1394779_at         | A1717218    | 4       | ---    | ---       | ---      |
| 1397184_at         | A1574688    | 4       | ---    | ---       | ---      |

\* Genes represented by multiple probe sets



**Table S2. Detailed functional categorizations of probe sets showing circadian oscillations in expression**

| Probe ID           | Accession # | Cluster | Symbol         | Gene name                                                 | Function |
|--------------------|-------------|---------|----------------|-----------------------------------------------------------|----------|
| <i>EST/Unknown</i> |             |         |                |                                                           |          |
| 1397266_at         | AA946437    | 4       | ---            | ---                                                       | ---      |
| 1397624_at         | B1300158    | 4       | ---            | ---                                                       | ---      |
| 1398886_at         | B1285703    | 4       | ---            | ---                                                       | ---      |
| 1399001_at         | B1285943    | 4       | ---            | ---                                                       | ---      |
| 1393632_at         | A1501709    | 5       | <i>Clqmf7</i>  | Clq & tumor necrosis factor related protein 7             | ---      |
| 1399150_at         | AW144400    | 5       | <i>Fam116a</i> | Family with sequence similarity 116, a                    | ---      |
| 1383155_at         | AA945854    | 5       | <i>Fam117b</i> | Family with sequence similarity 117, b                    | ---      |
| 1373068_at         | A1236977    | 5       | <i>Ifi42</i>   | Interferon-related developmental regulator 2              | ---      |
| 1375898_at         | AW252379    | 5       | ---            | ---                                                       | ---      |
| 1379719_at         | A1408386    | 5       | ---            | ---                                                       | ---      |
| 1390831_at         | BF407157    | 5       | ---            | ---                                                       | ---      |
| 1392249_at         | A1145746    | 5       | ---            | ---                                                       | ---      |
| 1395275_at         | BM390168    | 5       | ---            | ---                                                       | ---      |
| 1396773_at         | BF391930    | 5       | ---            | ---                                                       | ---      |
| 1398522_at         | BM386512    | 6       | <i>Ankle2</i>  | Ankyrin repeat & lem domain containing 2                  | ---      |
| 1388176_at         | A1717047    | 6       | <i>Cmi5</i>    | Camelto-like 5                                            | ---      |
| 1385108_at         | AW524173    | 6       | <i>Fam126b</i> | Family with sequence similarity 126, b                    | ---      |
| 1391780_at         | BG373221    | 6       | <i>*Fam46b</i> | Family with sequence similarity 46, b                     | ---      |
| 1384081_at         | BG372643    | 6       | <i>*Fam46b</i> | Family with sequence similarity 46, b                     | ---      |
| 1390171_at         | AA924717    | 6       | <i>Fam76a</i>  | Family with sequence similarity 76, a                     | ---      |
| 1393610_at         | A1137173    | 6       | <i>Fam76a</i>  | Family with sequence similarity 76, a                     | ---      |
| 1395966_at         | B1282914    | 6       | <i>Kcd14</i>   | Potassium channel tetramerisation domain containing 14    | ---      |
| 1377492_at         | BM387395    | 6       | <i>Rprml</i>   | Reprimo-like                                              | ---      |
| 1373850_at         | AW251315    | 6       | <i>Snpd3b</i>  | Sphingomyelin phosphodiesterase, acid-like 3b             | ---      |
| 1379627_at         | AW534630    | 6       | <i>Tm9f3</i>   | Transmembrane 9 superfamily 3                             | ---      |
| 1398553_at         | A1137113    | 6       | <i>Tmed5</i>   | Transmembrane emp24 protein transport domain containing 5 | ---      |
| 1392652_at         | A1060083    | 6       | <i>Tmem116</i> | Transmembrane protein 116                                 | ---      |
| 1392490_at         | BM390676    | 6       | <i>Tmem57</i>  | Transmembrane protein 57                                  | ---      |
| 1395058_at         | A1556441    | 6       | <i>Wdr75</i>   | Wd repeat domain 75                                       | ---      |

\* Genes represented by multiple probe sets

**Table S2. Detailed functional categorizations of probe sets showing circadian oscillations in expression**

| Probe ID           | Accession # | Cluster | Symbol         | Gene name                             | Function |
|--------------------|-------------|---------|----------------|---------------------------------------|----------|
| <i>EST/Unknown</i> |             |         |                |                                       |          |
| 1385783_at         | BF418697    | 6       | <i>Wwc2</i>    | Ww & c2 domain containing 2           | ---      |
| 1395525_at         | AW921946    | 6       | <i>Wwc2</i>    | Ww & c2 domain containing 2           | ---      |
| 1374991_at         | BE107630    | 6       | <i>Ydjc</i>    | Ydjc homolog                          | ---      |
| 1367498_at         | AI177873    | 6       | <i>Yhdj1</i>   | Yth domain family, 1                  | ---      |
| 1382199_at         | BF288776    | 6       | <i>Zcchc14</i> | Zinc finger, ehc domain containing 14 | ---      |
| 1372213_at         | BM390487    | 6       | ---            | ---                                   | ---      |
| 1373699_at         | BM391164    | 6       | ---            | ---                                   | ---      |
| 1374434_at         | BI291703    | 6       | ---            | ---                                   | ---      |
| 1377148_at         | AI412344    | 6       | ---            | ---                                   | ---      |
| 1378982_at         | AI145793    | 6       | ---            | ---                                   | ---      |
| 1379137_at         | BF387378    | 6       | ---            | ---                                   | ---      |
| 1379141_at         | BF402028    | 6       | ---            | ---                                   | ---      |
| 1380326_at         | BF388747    | 6       | ---            | ---                                   | ---      |
| 1380365_at         | BF403932    | 6       | ---            | ---                                   | ---      |
| 1380777_at         | BF399517    | 6       | ---            | ---                                   | ---      |
| 1380882_at         | BF390857    | 6       | ---            | ---                                   | ---      |
| 1380923_at         | AI236047    | 6       | ---            | ---                                   | ---      |
| 1380937_at         | BE106331    | 6       | ---            | ---                                   | ---      |
| 1381165_at         | BF403479    | 6       | ---            | ---                                   | ---      |
| 1381786_at         | BE114356    | 6       | ---            | ---                                   | ---      |
| 1382106_at         | AA848629    | 6       | ---            | ---                                   | ---      |
| 1382534_at         | BF284898    | 6       | ---            | ---                                   | ---      |
| 1382742_at         | AI176758    | 6       | ---            | ---                                   | ---      |
| 1385973_at         | AI717265    | 6       | ---            | ---                                   | ---      |
| 1391002_at         | AA801280    | 6       | ---            | ---                                   | ---      |
| 1391065_at         | BG373309    | 6       | ---            | ---                                   | ---      |
| 1392177_at         | BF400937    | 6       | ---            | ---                                   | ---      |
| 1392316_at         | BI293349    | 6       | ---            | ---                                   | ---      |
| 1392504_at         | BI297184    | 6       | ---            | ---                                   | ---      |

\* Genes represented by multiple probe sets

**Table S2. Detailed functional categorizations of probe sets showing circadian oscillations in expression**

| Probe ID           | Accession # | Cluster | Symbol         | Gene name                                        | Function |
|--------------------|-------------|---------|----------------|--------------------------------------------------|----------|
| <i>EST/Unknown</i> |             |         |                |                                                  |          |
| 1392627_x_at       | BI282114    | 6       | ---            | ---                                              | ---      |
| 1392675_at         | AI044784    | 6       | ---            | ---                                              | ---      |
| 1392838_at         | BF398054    | 6       | ---            | ---                                              | ---      |
| 1393909_at         | BF544438    | 6       | ---            | ---                                              | ---      |
| 1394574_at         | BF398290    | 6       | ---            | ---                                              | ---      |
| 1395030_at         | BM390366    | 6       | ---            | ---                                              | ---      |
| 1395178_at         | AI556682    | 6       | ---            | ---                                              | ---      |
| 1395859_at         | BI293415    | 6       | ---            | ---                                              | ---      |
| 1397225_at         | AA875647    | 6       | ---            | ---                                              | ---      |
| 1397380_at         | BG376947    | 6       | ---            | ---                                              | ---      |
| 1397453_at         | BM390792    | 6       | ---            | ---                                              | ---      |
| 1397915_at         | AW526790    | 6       | ---            | ---                                              | ---      |
| 1398051_at         | BF392993    | 6       | ---            | ---                                              | ---      |
| 1398126_at         | AW529975    | 6       | ---            | ---                                              | ---      |
| 1374139_at         | BG671589    | 7       | <i>Cbr2</i>    | Cerebellar degeneration-related protein 2, 62kda | ---      |
| 1378156_at         | BE109002    | 7       | <i>Cys1</i>    | Cystin 1                                         | ---      |
| 1392510_at         | BF283618    | 7       | <i>Fam180a</i> | Family with sequence similarity 180, a           | ---      |
| 1373310_at         | BF396512    | 7       | ---            | ---                                              | ---      |
| 1374176_at         | AI408727    | 7       | ---            | ---                                              | ---      |
| 1378292_at         | BE096367    | 7       | ---            | ---                                              | ---      |
| 1379477_at         | AI555261    | 7       | ---            | ---                                              | ---      |
| 1382031_at         | AA859079    | 7       | ---            | ---                                              | ---      |
| 1390770_at         | BF396139    | 7       | ---            | ---                                              | ---      |
| 1397070_at         | BF402703    | 7       | ---            | ---                                              | ---      |
| 1397820_at         | BF553729    | 7       | ---            | ---                                              | ---      |
| 1398662_at         | AA901088    | UC      | <i>Fam167a</i> | Family with sequence similarity 167, a           | ---      |
| 1393505_x_at       | AI045965    | UC      | <i>Fam63b</i>  | Family with sequence similarity 63, b            | ---      |
| 1391998_at         | BE107625    | UC      | <i>Phf20l1</i> | Phd finger protein 20-like 1                     | ---      |
| 1376061_at         | AW525033    | UC      | ---            | ---                                              | ---      |

\* Genes represented by multiple probe sets

**Table S2. Detailed functional categorizations of probe sets showing circadian oscillations in expression**

| Probe ID           | Accession # | Cluster | Symbol | Gene name | Function |
|--------------------|-------------|---------|--------|-----------|----------|
| <i>EST/Unknown</i> |             |         |        |           |          |
| 1388678_at         | AI176695    | UC      | ---    | ---       | ---      |
| 1395762_at         | BG670091    | UC      | ---    | ---       | ---      |

\* Genes represented by multiple probe sets
