# Supplementary material
Source: PubMed Central journal article supplement (PMC3119131)
Supplement: supp_japplphysiol.00079.2011_tableS3.pdf [file supp_japplphysiol.00079.2011_tableS3.pdf]

**Table S3. Details on genes associated with lung diseases showing circadian oscillations in expression**

| Probe set ID  | Symbol          | Gene name                                         | Species | Type       | Cluster | Effects                                                            |
|---------------|-----------------|---------------------------------------------------|---------|------------|---------|--------------------------------------------------------------------|
| <i>Asthma</i> |                 |                                                   |         |            |         |                                                                    |
| 1370941_at    | <i>Pdgfra</i>   | Platelet-derived growth factor receptor, $\alpha$ | M       | Up         | 1       | Increase in murine asthma; affects SM development                  |
| 1398799_at    | <i>Eif4e</i>    | Eukaryotic translation initiation factor 4E       | H       | Down       | 1       | Involved in proliferation of Bronchial SM                          |
| 1372459_at    | <i>Vasp</i>     | Vasodilator-stimulated phosphoprotein             | H       | Down       | 2       | Decreased VASP phosphorylation in asthmatics                       |
| 1391946_at    | <i>Selp</i>     | Selectin P                                        | Many    | PA         | 2       | Involved in eosinophil recruitment                                 |
| 1370634_x_at  | <i>Cxcl3</i>    | Chemokine ligand 3                                | H       | Up         | 2       | Higher mRNA expression in asthmatics                               |
| 1368073_at    | <i>Irf1</i>     | Interferon regulatory factor 1                    | H       | PO         | 2       | Linked to Th1/Th2 cytokine balance                                 |
| 1369943_at    | <i>Tgm2</i>     | Transglutaminase 2                                | H       | Up         | 2       | Involved in eicosanoid formation in asthmatic airway               |
| 1387219_at    | <i>Adm</i>      | Adrenomedullin                                    | Many    | Up, PA, KO | 2       | Increased during acute asthma attacks; bronchodilatory action      |
| 1399027_at    | <i>Rhoa</i>     | Ras homolog gene family, A                        | Many    | Up, PA     | 2       | Increased in BLF of murine and human asthmatic                     |
| 1370642_s_at  | <i>Pdgfrb</i>   | Platelet-derived growth factor receptor, $\beta$  | M       | Up         | 2       | Increase in murine asthma; affects SM development                  |
| 1368488_at    | <i>Nfil3</i>    | Nuclear factor, interleukin 3 regulated           | M       | KO         | 2       | Involved in IgE production                                         |
| 1369625_at    | <i>Aqp1</i>     | Aquaporin 1                                       | M       | Down       | 2       | Lower expression in murine asthma linked to fluid dynamics         |
| 1379688_at    | <i>Iga4</i>     | Integrin, $\alpha$ 4                              | M       | KO         | 3       | KO failed to develop asthma pheno                                  |
| 1383189_at    | <i>Tnfrsf10</i> | Tumor necrosis factor superfamily, 10             | Many    | Up         | 3       | Inhibition reduces inflammation                                    |
| 1381311_at    | <i>Emr1</i>     | Egf-like module containing receptor 1             | H       | Up         | 3       | Linked to eosinophil adhesion & activation                         |
| 1388583_at    | <i>Cxcl12</i>   | Chemokine ligand 12                               | Many    | Up         | 3       | Linked to leukocyte recruitment                                    |
| 1368300_at    | <i>Adora2a</i>  | Adenosine A2a receptor                            | H       | PO         | 3       | Involved in bronchoconstriction                                    |
| 1394919_at    | <i>Hgf</i>      | Hepatocyte growth factor                          | Many    | Up, PA     | 3       | Suppression of antigen induced immune response                     |
| 1379375_at    | <i>Pdgfa</i>    | Platelet-derived growth factor $\alpha$           | H       | Up         | 3       | Higher in chronic rhinosinusitis with asthma                       |
| 1373401_at    | <i>Tnc</i>      | Tenascin C                                        | H       | Up         | 4       | Abnormal deposition on basal membrane                              |
| 1376619_at    | <i>Piprd</i>    | Protein tyrosine phosphatase, receptor, D         | H       | PO         | 4       | Polymorphism associated with asthma                                |
| 1373683_at    | <i>Fyn</i>      | FYN oncogene related to SRC, FGR, YES             | H       | PO         | 4       | Linked to IgE-dependent mast cell degranulation                    |
| 1391428_at    | <i>Angpt1</i>   | Angiotensin 1                                     | Many    | Up         | 4       | Levels higher in asthmatics; linked to airway remodeling           |
| 1377113_at    | <i>Fhl1</i>     | Fms-related tyrosine kinase 1                     | H       | Up         | 4       | Involved in angiogenesis & airway remodeling                       |
| 1375523_at    | <i>Marcks</i>   | Myristoylated alanine-rich PKC substrate          | M       | PA         | 4       | Blocks mucus hypersecretion in a murine asthma                     |
| 1382481_a_at  | <i>Adam33</i>   | ADAM metallopeptidase domain 33                   | H       | PO         | 5       | Airway remodeling & decreasing lung function                       |
| 1369115_at    | <i>Adrb2</i>    | Adrenergic, $\beta$ -2-, receptor, surface        | H       | PO         | 6       | Gly16 polymorphism is common in nocturnal asthma                   |
| 1385393_at    | <i>Ppargc1a</i> | PPAR $\gamma$ , coactivator 1 $\alpha$            | H       | Up         | 6       | Increased in bronchial SM                                          |
| 1393917_at    | <i>Cd163</i>    | CD163 molecule                                    | H       | Up         | 7       | Anti-inflammatory molecule increased in severe asthmatics          |
| 1367631_at    | <i>Ctgf</i>     | Connective tissue growth factor                   | H       | Up         | 7       | CTGF response after TGF $\beta$ treatment is greater in asthmatics |
| 1392648_at    | <i>Mrc1</i>     | Mannose receptor, C 1                             | H       | PO         | 7       | Linked to host immune response                                     |
| 1367577_at    | <i>Hspb1</i>    | Heat shock 27kda protein 1                        | H       | Up         | 8       | Protection against the oxidative stress                            |

Abbreviations: H-human, M-mouse, R-rats, PA-pathogenesis, PO-polymorphism, KO-knock out, DT-drug treatment, BLF- bronchoalveolar lavage fluid, SM-smooth muscle, ALI-acute lung injury, CAP-community acquired pneumonia, GC- glucocorticoid, NSCLC- non-small cell lung carcinoma

**Table S3. Details on genes associated with lung diseases showing circadian oscillations in expression**

| Probe set ID       | Symbol         | Gene name                                         | Species | Type         | Cluster | Effects                                                                 |
|--------------------|----------------|---------------------------------------------------|---------|--------------|---------|-------------------------------------------------------------------------|
| <b>COPD</b>        |                |                                                   |         |              |         |                                                                         |
| 1370941_at         | <i>Pdgfra</i>  | Platelet-derived growth factor receptor, $\alpha$ |         | Up           | 1       | Increased expression in COPD                                            |
| 1387219_at         | <i>Adm</i>     | Adrenomedullin                                    | H       | Up           | 2       | Plasma concentrations increased in COPD                                 |
| 1368200_at         | <i>Cx3cl1</i>  | Chemokine ligand 1                                | M       | Up           | 2       | Increased in murine COPD; increase recruitment of immune cells          |
| 1367860_a_at       | <i>Mmp14</i>   | Matrix metalloproteinase 14                       | Many    | Up, PA       | 3       | Specific haplo linked to mucin over production                          |
| 1388111_at         | <i>Eln</i>     | Elastin                                           | H       | PO           | 3       | Linked to elastic fiber formation                                       |
| 1393314_at         | <i>Fgf1</i>    | Fibroblast growth factor 1                        | H       | Up           | 3       | Related to airway remodeling                                            |
| 1368829_at         | <i>Fbn1</i>    | Fibrillin 1                                       | M       | KO           | 3       | KO develops emphysema; alters sequestration of cytokines                |
| 1393356_at         | <i>Pde5a</i>   | Phosphodiesterase 5A, cGmp-specific               | H       | DT           | 4       | regulation of airway remodeling, important drug target                  |
| 1375523_at         | <i>Marc5</i>   | Myristoylated alanine-rich PKC substrate          | M       | PA           | 4       | Blocks mucus hypersecretion in murine models                            |
| 1382481_a_at       | <i>Adam33</i>  | ADAM metalloproteinase domain 33                  | H       | PO           | 5       | Linked to airway remodeling                                             |
| 1369115_at         | <i>Adrb2</i>   | Adrenergic, $\beta$ -2-, receptor, surface        | H       | PO, DT       | 6       | Polymorphism linked to COPD; important drug target                      |
| 1373092_at         | <i>Tgfb3</i>   | Transforming growth factor, $\beta$ receptor III  | Many    | PO, down     | 6       | Polymorphism linked to both murine & human COPD                         |
| 1386080_at         | <i>Hcy1</i>    | Hairy/enhancer-of-split related with YRPW 1       | H       | Down         | 6       | Down-regulated in COPD smokers                                          |
| 1367631_at         | <i>Cg1f</i>    | Connective tissue growth factor                   | H       | Up           | 7       | Upregulated in the lungs of COPD patients                               |
| 1389836_a_at       | <i>Timp3</i>   | TIMP metalloproteinase inhibitor 3                | M       | KO           | 7       | KO develop emphysema like airspace enlargement                          |
| <b>Lung Injury</b> |                |                                                   |         |              |         |                                                                         |
| 1372459_at         | <i>Vasp</i>    | Vasodilator-stimulated phosphoprotein             | M       | Down, KO, PA | 2       | KO = model for ALI with pulmonary damage                                |
| 1387083_at         | <i>Cf1f</i>    | Cardiotrophin 1                                   | R       | DT           | 2       | Attenuates LPS induced ALI                                              |
| 1379688_at         | <i>Iga4</i>    | Integrin, $\alpha 4$                              | M       | PA           | 3       | Prevents LPS induced ALI                                                |
| 1368342_at         | <i>Ampd3</i>   | Adenosine monophosphate deaminase 3               | M       | Up           | 3       | Linked to increased neutrophil infiltration & cytokine production       |
| 1368300_at         | <i>Adora2a</i> | Adenosine A2a receptor                            | M       | DT           | 3       | Agonist attenuates ALI & inhibits immune cell activation                |
| 1373401_at         | <i>Trc</i>     | Tenascin C                                        | M       | Up, KO       | 4       | KO protected from ALI; linked to Tgff action on lung healing            |
| 1391428_at         | <i>Angpt1</i>  | Angiopoietin 1                                    | M       | DT           | 4       | Attenuates H <sub>2</sub> O <sub>2</sub> induced ALI & vascular leakage |
| 1375692_at         | <i>Mapk1</i>   | Mitogen-activated PK 1                            | M       | DT           | 4       | Inhibitor attenuates ALI by reducing inflammation                       |
| 1388271_at         | <i>Mt2a</i>    | Metallothionein 2A                                | Many    | Up, KO       | 6       | KO= more susceptible to heavy metal induced lung injury                 |
| 1368025_at         | <i>Ddit4</i>   | DNA-damage-inducible transcript 4                 | Many    | Up, KO       | 6       | Linked to cigarette smoke induced lung injury                           |
| 1383169_at         | <i>Lifr</i>    | Leukemia inhibitory factor receptor $\alpha$      | M       | Up           | 6       | Increased in BLF & decreased in lung tissue in ALI                      |
| 1382512_at         | <i>Rock2</i>   | Rho-associated, coiled-coil containing PK 2       | M       | DT           | 6       | Inhibition attenuate ALI & decrease neutrophil emigration               |
| 1380926_at         | <i>Map3k2</i>  | Mitogen-activated PK kinase 2                     | M       | KO           | 6       | KO= more susceptible to heavy metal induced lung injury                 |
| 1372615_at         | <i>Aoc3</i>    | Amine oxidase, copper containing 3                | M       | KO, DT       | 6       | KO or inhibition attenuated ALI                                         |
| 1389836_a_at       | <i>Timp3</i>   | TIMP metalloproteinase inhibitor 3                | M       | KO           | 7       | KO = increased neutrophil chemotactic activity                          |
| 1367577_at         | <i>Hspb1</i>   | Heat shock 27kda protein 1                        | M       | PA           | 8       | Involved in ventilator associated lung injury                           |

Abbreviations: H-human, M-mouse, R-rats, PA-pathogenesis, PO-polymorphism, KO-knock out, DT-drug treatment, BLF- bronchoalveolar lavage fluid, SM-smooth muscle, ALI-acute lung injury, CAP-community acquired pneumonia, GC- glucocorticoid, NSCLC- non-small cell lung carcinoma

**Table S3. Details on genes associated with lung diseases showing circadian oscillations in expression**

| Probe set ID                           | Symbol          | Gene name                                         | Species | Type       | Cluster | Effects                                                          |
|----------------------------------------|-----------------|---------------------------------------------------|---------|------------|---------|------------------------------------------------------------------|
| <i>Microbial Infection</i>             |                 |                                                   |         |            |         |                                                                  |
| 1368200_at                             | <i>Cx3cl1</i>   | Chemokine ligand 1                                | M       | Up         | 2       | Increased pulmonary expression after metapneumovirus infection   |
| 1368073_at                             | <i>Irf1</i>     | Interferon regulatory factor 1                    |         | PA         | 2       | Regulates IFN production; important role in TB infection         |
| 1370847_at                             | <i>Spon2</i>    | Spondin 2                                         | M       | KO         | 3       | KO more prone to viral infection                                 |
| 1391737_at                             | <i>Ncf4</i>     | Neutrophil cytosolic factor 4                     | M       | KO         | 3       | KO= defective ROS production in neutrophils                      |
| 1388527_at                             | <i>Anxrl</i>    | Anthrax toxin receptor 1                          |         | PA         | 3       | Internalization of anthrax toxins                                |
| 1372818_at                             | <i>Colect12</i> | Collectin sub-family 12                           | Many    | PA         | 4       | Pathogen binding & clearance                                     |
| 1376880_at                             | <i>Tbk1</i>     | TANK-binding kinase 1                             |         | PA         | 4       | Induction of IFN after bacterial or viral infection              |
| 1393432_a_at                           | <i>Dhx36</i>    | DEAH box 36                                       |         | PA         | 4       | Involved in sensing of microbial DNA in dendritic cells          |
| 1389521_at                             | <i>Ivns1abp</i> | Influenza virus NS1A binding protein              |         | PA         | 6       | Influenza viral infection                                        |
| 1392648_at                             | <i>Mrc1</i>     | Mannose receptor, C 1                             |         | PA         | 7       | Pathogen molecular pattern recognition                           |
| <i>Pulmonary &amp; Cystic Fibrosis</i> |                 |                                                   |         |            |         |                                                                  |
| 1370941_at                             | <i>Pdgfra</i>   | Platelet-derived growth factor receptor, $\alpha$ | M       | DT         | 1       | Inhibition decreases parenchymal fibrosis                        |
| 1367624_at                             | <i>Aif4</i>     | Activating transcription factor 4                 | H       | Up         | 1       | Linked to ER stress & apoptosis of alveolar cells                |
| 1387219_at                             | <i>Adm</i>      | Adrenomedullin                                    | H       | Up         | 2       | Higher plasma levels in cystic fibrosis patients                 |
| 1368408_at                             | <i>Grk5</i>     | G protein-coupled receptor kinase 5               | H       | Up         | 2       | Regulation of $\beta$ 2-adrenoceptor                             |
| 1388583_at                             | <i>Cxcl12</i>   | Chemokine ligand 12                               | Many    | Up, PA, DT | 3       | Inhibition attenuates fibrosis by blocking fibrocyte recruitment |
| 1393508_at                             | <i>Nox4</i>     | NADPH oxidase 4                                   | Many    | Up         | 3       | Modulation of response to TGF $\beta$ & PDGF signaling           |
| 1383641_at                             | <i>Ednra</i>    | Endothelin receptor A                             | H       | Up, PO     | 3       | Pro-inflammatory peptide & SM agonist                            |
| 1395413_at                             | <i>Lrp6</i>     | LDLR-related protein 6                            | H       | Up         | 6       | Associated with increased Wnt signaling                          |
| <i>Pulmonary Hypertension (PH)</i>     |                 |                                                   |         |            |         |                                                                  |
| 1374529_at                             | <i>Thbs1</i>    | Thrombospondin 1                                  | M       | KO         | 1       | KO resistant to PH                                               |
| 1387219_at                             | <i>Adm</i>      | Adrenomedullin                                    | H       | Up         | 2       | Plasma Adm higher in PH patients                                 |
| 1387083_at                             | <i>Cfjl</i>     | Cardiotrophin 1                                   | M       | DT         | 2       | Treatment attenuates PH & linked to nitric oxide synthesis       |
| 1370642_s_at                           | <i>Pdgfrb</i>   | Platelet-derived growth factor receptor, $\beta$  | H       | Up         | 2       | Upregulated in PH patients                                       |
| 1399027_at                             | <i>Rhoa</i>     | Ras homolog gene family, A                        | R       | Up, DT     | 2       | Increased activity in PH; attenuated by inhibitors               |
| 1367866_at                             | <i>Fbln5</i>    | Fibulin 5                                         | M       | Up         | 4       | Increased expression in murine PH                                |
| 1393356_at                             | <i>Pde5a</i>    | Phosphodiesterase 5A, cgnp-specific               | Many    | DT         | 4       | Inhibition attenuates PH by regulating vascular remodeling       |
| 1389780_at                             | <i>Tipi</i>     | Tissue factor pathway inhibitor                   | M       | TG         | 4       | Overexpression inhibits PH                                       |
| 1367982_at                             | <i>Alas1</i>    | Aminolevulinatase, delta-, synthase 1             | M       | Up         | 6       | Increased expression in PH                                       |
| 1382512_at                             | <i>Rock2</i>    | Rho-associated, coiled-coil containing PK 2       | Many    | Up, DT     | 6       | Inhibition attenuates PH                                         |
| <i>Others</i>                          |                 |                                                   |         |            |         |                                                                  |
| 1374529_at                             | <i>Thbs1</i>    | Thrombospondin 1                                  | H       | Up         | 1       | Increased serum levels in Idiopathic interstitial pneumonia      |

Abbreviations: H-human, M-mouse, R-rats, PA-pathogenesis, PO-polymorphism, KO-knock out, DT-drug treatment, BLF- bronchoalveolar lavage fluid, SM-smooth muscle, ALI-acute lung injury, CAP-community acquired pneumonia, GC- glucocorticoid, NSCLC- non-small cell lung carcinoma

**Table S3. Details on genes associated with lung diseases showing circadian oscillations in expression**

| Probe set ID                   | Symbol          | Gene name                                        | Species | Type   | Cluster | Effects                                                           |
|--------------------------------|-----------------|--------------------------------------------------|---------|--------|---------|-------------------------------------------------------------------|
| <i>Others</i>                  |                 |                                                  |         |        |         |                                                                   |
| 1368073_at                     | <i>Irf1</i>     | Interferon regulatory factor 1                   | R       | Up     | 2       | Induced in alveolar cells during endotoxemia                      |
| 1383906_at                     | <i>Neur13</i>   | Neuralized homolog 3                             | M       | Up, PA | 3       | Upregulated in murine endotoxemia & suppressed by GC              |
| 1389780_at                     | <i>Tjpi</i>     | Tissue factor pathway inhibitor                  | H       | DT     | 4       | Recombinant Tjpi in phase 3 trial for CAP treatment               |
| <i>Cancer (Selected Genes)</i> |                 |                                                  |         |        |         |                                                                   |
| 1370642_s_at                   | <i>Pdgfrb</i>   | Platelet-derived growth factor receptor, $\beta$ | H       | DT     | 2       | Inhibitor in clinical trial for treating metastatic solid tumors  |
| 1383189_at                     | <i>Tnfrsf10</i> | Tumor necrosis factor superfamily, 10            | H       | DT     | 3       | Recombinant protein in clinical trial for treating advanced NSCLC |
| 1388583_at                     | <i>Cxcl12</i>   | Chemokine ligand 12                              | H       | DT     | 3       | Antagonists in clinical trial for treating NSCLC                  |
| 1394919_at                     | <i>Hgf</i>      | Hepatocyte growth factor                         | H       | DT     | 3       | Neutralizing antibody in clinical trial for treating NSCLC        |
| 1373683_at                     | <i>Fyn</i>      | FYN oncogene related to SRC, FGR, YES            | H       | DT     | 4       | Inhibitor in clinical trial for treating NSCLC                    |
| 1391428_at                     | <i>Angpt1</i>   | Angiopoietin 1                                   | H       | DT     | 4       | Neutralizing antibody in clinical trial for treating solid tumors |
| 1377113_at                     | <i>Fhl1</i>     | Fms-related tyrosine kinase 1                    | H       | DT     | 4       | Inhibitor and ribozyme in clinical trial for treating NSCLC       |

Abbreviations: H-human, M-mouse, R-rats, PA-pathogenesis, PO-polymorphism, KO-knock out, DT-drug treatment, BLF- bronchoalveolar lavage fluid, SM-smooth muscle, ALI-acute lung injury, CAP-community acquired pneumonia, GC- glucocorticoid, NSCLC- non-small cell lung carcinoma
