# Supplementary material
Source: PubMed Central journal article supplement (PMC3119131)
Supplement: supp_japplphysiol.00079.2011_tableS4.pdf [file supp_japplphysiol.00079.2011_tableS4.pdf]

**Table S4.** Genes associated with cancer showing circadian oscillations in expression

| <b>Symbol</b>    | <b>Cluster</b> | <b>Gene name</b>                                       |
|------------------|----------------|--------------------------------------------------------|
| <i>Krt19</i>     | 1              | Keratin 19                                             |
| <i>Thbs1</i>     | 1              | Thrombospondin 1                                       |
| <i>Oat</i>       | 1              | Ornithine aminotransferase                             |
| <i>Scd</i>       | 1              | Stearoyl-coa desaturase                                |
| <i>Umps</i>      | 1              | Uridine monophosphate synthetase                       |
| <i>Hnrnpc</i>    | 1              | Heterogeneous nuclear ribonucleoprotein C              |
| <i>Hsp90aa1</i>  | 1              | Heat shock protein 90kda $\alpha$ , class A 1          |
| <i>Hsp90b1</i>   | 1              | Heat shock protein 90kda $\beta$ , 1                   |
| <i>Hspa5</i>     | 1              | Heat shock 70kda protein 5                             |
| <i>Leprel1</i>   | 1              | Leprecan-like 1                                        |
| <i>Hsph1</i>     | 1              | Heat shock 105kda/110kda protein 1                     |
| <i>Dact2</i>     | 1              | Dapper, antagonist of $\beta$ -catenin, homolog 2      |
| <i>Tnfrsf12a</i> | 1              | Tumor necrosis factor receptor super, 12A              |
| <i>Pdgfra</i>    | 1              | Platelet-derived growth factor receptor, $\alpha$      |
| <i>Tm4sf1</i>    | 1              | Transmembrane 4 L six 1                                |
| <i>Atf4</i>      | 1              | Activating transcription factor 4                      |
| <i>Cry1</i>      | 1              | Cryptochrome 1                                         |
| <i>Eif4e</i>     | 1              | Eukaryotic translation initiation factor 4E            |
| <i>Bbc3</i>      | 2              | BCL2 binding component 3                               |
| <i>Blcap</i>     | 2              | Bladder cancer associated protein                      |
| <i>Aifm2</i>     | 2              | Apoptosis-inducing factor, mitochondrion-associated, 2 |
| <i>Clspn</i>     | 2              | Claspin homolog                                        |
| <i>Fzr1</i>      | 2              | Fizzy/cell division cycle 20 related 1                 |
| <i>H2afx</i>     | 2              | H2A histone , X                                        |
| <i>G0s2</i>      | 2              | G0/g1switch 2                                          |
| <i>Kif3c</i>     | 2              | Kinesin 3C                                             |
| <i>Sept7</i>     | 2              | Septin 7                                               |
| <i>Fnbp1l</i>    | 2              | Formin binding protein 1-like                          |
| <i>Adamts4</i>   | 2              | ADAM metalloproteinase with thrombospondin 1 , 4       |
| <i>Adamts9</i>   | 2              | ADAM metalloproteinase with thrombospondin 1 , 9       |
| <i>Itgb6</i>     | 2              | Integrin, $\beta$ 6                                    |
| <i>Selp</i>      | 2              | Selectin P                                             |
| <i>Cx3cl1</i>    | 2              | Chemokine ligand 1                                     |
| <i>Cxcl3</i>     | 2              | Chemokine ligand 3                                     |
| <i>Bst2</i>      | 2              | Bone marrow stromal cell antigen 2                     |
| <i>Irf1</i>      | 2              | Interferon regulatory factor 1                         |
| <i>Pctp</i>      | 2              | Phosphatidylcholine transfer protein                   |
| <i>Pgam1</i>     | 2              | Phosphoglycerate mutase 1                              |
| <i>Enpp3</i>     | 2              | Ectonucleotide pyrophosphatase/phosphodiesterase 3     |
| <i>Acss1</i>     | 2              | Acyl-coa synthetase short-chain 1                      |
| <i>Ass1</i>      | 2              | Argininosuccinate synthase 1                           |
| <i>Fabp5</i>     | 2              | Fatty acid binding protein 5                           |

**Table S4.** Genes associated with cancer showing circadian oscillations in expression

| <b>Symbol</b>  | <b>Cluster</b> | <b>Gene name</b>                                         |
|----------------|----------------|----------------------------------------------------------|
| <i>Alox12</i>  | 2              | Arachidonate 12-lipoxygenase                             |
| <i>Tgm2</i>    | 2              | Transglutaminase 2                                       |
| <i>Htra3</i>   | 2              | Htra serine peptidase 3                                  |
| <i>Psmc8</i>   | 2              | Proteasome 26S subunit, non-atpase, 8                    |
| <i>Pdia6</i>   | 2              | Protein disulfide isomerase A, 6                         |
| <i>Inhbb</i>   | 2              | Inhibin, $\beta$ B                                       |
| <i>Grk5</i>    | 2              | G protein-coupled receptor kinase 5                      |
| <i>Met</i>     | 2              | Met proto-oncogene                                       |
| <i>Fgg</i>     | 2              | Fibrinogen $\gamma$ chain                                |
| <i>Akap12</i>  | 2              | A kinase anchor protein 12                               |
| <i>Thra</i>    | 2              | Thyroid hormone receptor, $\alpha$                       |
| <i>Rap1gap</i> | 2              | RAP1 gtpase activating protein                           |
| <i>Rnd1</i>    | 2              | Rho gtpase 1                                             |
| <i>Rhoa</i>    | 2              | Ras homolog gene , A                                     |
| <i>Wisp2</i>   | 2              | WNT1 inducible signaling pathway protein 2               |
| <i>Pdgfrb</i>  | 2              | Platelet-derived growth factor receptor, $\beta$         |
| <i>Gadd45g</i> | 2              | Growth arrest & DNA-damage-inducible, $\gamma$           |
| <i>Fam3c</i>   | 2              | with sequence similarity 3, C                            |
| <i>Iqgap2</i>  | 2              | IQ containing gtpase activating protein 2                |
| <i>Leo1</i>    | 2              | Leo1, paf1/rna polymerase2 complex component, homolog    |
| <i>Sox4</i>    | 2              | SRY -box 4                                               |
| <i>Hoxb2</i>   | 2              | Homeobox B2                                              |
| <i>Zfp423</i>  | 2              | Zinc finger protein 423                                  |
| <i>Srebf1</i>  | 2              | Sterol regulatory element binding transcription factor 1 |
| <i>Nfil3</i>   | 2              | Nuclear factor, interleukin 3 regulated                  |
| <i>Sox17</i>   | 2              | SRY -box 17                                              |
| <i>Sap130</i>  | 2              | Sin3A-associated protein, 130kda                         |
| <i>Slc3a2</i>  | 2              | Solute carrier 3 , 2                                     |
| <i>Aqp1</i>    | 2              | Aquaporin 1                                              |
| <i>Mcts1</i>   | 3              | Malignant T cell amplified sequence 1                    |
| <i>Pbx1</i>    | 3              | Pre-B-cell leukemia homeobox 1                           |
| <i>Numa1</i>   | 3              | Nuclear mitotic apparatus protein 1                      |
| <i>Cdc23</i>   | 3              | Cell division cycle 23 homolog                           |
| <i>Ccndbp1</i> | 3              | Cyclin D- binding-protein 1                              |
| <i>Wtap</i>    | 3              | Wilms tumor 1 associated protein                         |
| <i>Spon2</i>   | 3              | Spondin 2                                                |
| <i>Dag1</i>    | 3              | Dystroglycan 1                                           |
| <i>Mmp14</i>   | 3              | Matrix metalloproteinase 14                              |
| <i>Lox</i>     | 3              | Lysyl oxidase                                            |
| <i>Nid2</i>    | 3              | Nidogen 2                                                |
| <i>Fbn1</i>    | 3              | Fibrillin 1                                              |
| <i>Itga4</i>   | 3              | Integrin, $\alpha$ 4                                     |

**Table S4.** Genes associated with cancer showing circadian oscillations in expression

| <b>Symbol</b>   | <b>Cluster</b> | <b>Gene name</b>                                           |
|-----------------|----------------|------------------------------------------------------------|
| <i>Adamts15</i> | 3              | ADAM metallopeptidase with thrombospondin 1 , 15           |
| <i>Cmtm3</i>    | 3              | CKLF-like MARVEL transmembrane containing 3                |
| <i>Tnfsf10</i>  | 3              | Tumor necrosis factor super, 10                            |
| <i>Cxcl12</i>   | 3              | Chemokine ligand 12                                        |
| <i>Mog</i>      | 3              | Myelin oligodendrocyte glycoprotein                        |
| <i>Tmpo</i>     | 3              | Thymopoietin                                               |
| <i>Ampd3</i>    | 3              | Adenosine monophosphate deaminase 3                        |
| <i>Acpp</i>     | 3              | Acid phosphatase, prostate                                 |
| <i>Mtap</i>     | 3              | Methylthioadenosine phosphorylase                          |
| <i>Nox4</i>     | 3              | NADPH oxidase 4                                            |
| <i>Hnrpd</i>    | 3              | Heterogeneous nuclear ribonucleoprotein D                  |
| <i>Ddx17</i>    | 3              | DEAD box 17                                                |
| <i>Hnrpdl</i>   | 3              | Heterogeneous nuclear ribonucleoprotein D-like             |
| <i>Efna5</i>    | 3              | Ephrin-A5                                                  |
| <i>Pmpcb</i>    | 3              | Peptidase $\beta$                                          |
| <i>Ube4b</i>    | 3              | Ubiquitination factor E4B                                  |
| <i>Cull1</i>    | 3              | Cullin 1                                                   |
| <i>Fem1b</i>    | 3              | Fem-1 homolog b                                            |
| <i>Antxr1</i>   | 3              | Anthrax toxin receptor 1                                   |
| <i>Wnt2</i>     | 3              | Wingless- MMTV integration site 2                          |
| <i>Rbpj</i>     | 3              | Recombination signal binding protein J                     |
| <i>Fgf1</i>     | 3              | Fibroblast growth factor 1                                 |
| <i>Antxr2</i>   | 3              | Anthrax toxin receptor 2                                   |
| <i>Plxnd1</i>   | 3              | Plexin D1                                                  |
| <i>Rspo1</i>    | 3              | R-spondin homolog                                          |
| <i>Tnik</i>     | 3              | TRAF2 & NCK interacting kinase                             |
| <i>Dpagt1</i>   | 3              | Dolichyl-phosphate N-acetylglucosaminophosphotransferase 1 |
| <i>Epha4</i>    | 3              | EPH receptor A4                                            |
| <i>Rassf3</i>   | 3              | Ras association 3                                          |
| <i>Fat4</i>     | 3              | FAT tumor suppressor homolog 4                             |
| <i>Rasgrp3</i>  | 3              | RAS guanyl releasing protein 3                             |
| <i>Adora2a</i>  | 3              | Adenosine A2a receptor                                     |
| <i>Gng11</i>    | 3              | Guanine nucleotide binding protein , $\gamma$ 11           |
| <i>P2rx1</i>    | 3              | Purinergic receptor P2X, ligand-gated ion channel, 1       |
| <i>Map2k1</i>   | 3              | Mitogen-activated protein kinase kinase 1                  |
| <i>Lzic</i>     | 3              | Leucine zipper & CTNNBIP1 containing                       |
| <i>Acvr2a</i>   | 3              | Activin A receptor, IIA                                    |
| <i>Bex1</i>     | 3              | Brain expressed, X-linked 1                                |
| <i>Ednra</i>    | 3              | Endothelin receptor A                                      |
| <i>Prkci</i>    | 3              | Protein kinase C, iota                                     |
| <i>Gimap6</i>   | 3              | Gtpase, IMAP 6                                             |
| <i>Hgf</i>      | 3              | Hepatocyte growth factor                                   |

**Table S4.** Genes associated with cancer showing circadian oscillations in expression

| <b>Symbol</b>    | <b>Cluster</b> | <b>Gene name</b>                                             |
|------------------|----------------|--------------------------------------------------------------|
| <i>Pdgfa</i>     | 3              | Platelet-derived growth factor $\alpha$                      |
| <i>Armcx2</i>    | 3              | Armadillo repeat containing, X-linked 2                      |
| <i>Figf</i>      | 3              | C-fos induced growth factor                                  |
| <i>Arnt2</i>     | 3              | Aryl-hydrocarbon receptor nuclear translocator 2             |
| <i>Thra</i>      | 3              | Thyroid hormone receptor, $\alpha$                           |
| <i>Hdac3</i>     | 3              | Histone deacetylase 3                                        |
| <i>Smarca1</i>   | 3              | Swi/snf related, actin dependent regulator of chromatin e1   |
| <i>Lmo2</i>      | 3              | LIM only 2                                                   |
| <i>Nfat5</i>     | 3              | Nuclear factor of activated T-cells 5, tonicity-responsive   |
| <i>Satb1</i>     | 3              | SATB homeobox 1                                              |
| <i>Tead1</i>     | 3              | TEA 1                                                        |
| <i>Prdm1</i>     | 3              | PR containing 1, with ZNF                                    |
| <i>C1d</i>       | 3              | C1D nuclear receptor co-repressor                            |
| <i>Prdm16</i>    | 3              | PR containing 16                                             |
| <i>Ewsr1</i>     | 3              | Ewing sarcoma breakpoint region 1                            |
| <i>Kdm3a</i>     | 3              | Lysine -specific demethylase 3A                              |
| <i>Fubp3</i>     | 3              | Far upstream element binding protein 3                       |
| <i>Stard3</i>    | 3              | Star-related lipid transfer containing 3                     |
| <i>Slc39a7</i>   | 3              | Solute carrier 39 , 7                                        |
| <i>Lamp2</i>     | 3              | Lysosomal-associated membrane protein 2                      |
| <i>Amph</i>      | 3              | Amphiphysin                                                  |
| <i>Prtfcd1</i>   | 4              | Phosphoribosyl transferase containing 1                      |
| <i>Trp53inp1</i> | 4              | Tumor protein p53 inducible nuclear protein 1                |
| <i>Dock1</i>     | 4              | Dedicator of cytokinesis 1                                   |
| <i>Mll5</i>      | 4              | Myeloid/lymphoid or mixed-lineage leukemia 5                 |
| <i>Maged1</i>    | 4              | Melanoma antigen D, 1                                        |
| <i>Mtss1</i>     | 4              | Metastasis suppressor 1                                      |
| <i>Fbln5</i>     | 4              | Fibulin 5                                                    |
| <i>Tnc</i>       | 4              | Tenascin C                                                   |
| <i>Gpc4</i>      | 4              | Glypican 4                                                   |
| <i>Chl1</i>      | 4              | Cell adhesion molecule with homology to L1CAM                |
| <i>Serpinb9</i>  | 4              | Serpin peptidase inhibitor, clade B , 9                      |
| <i>Scp2</i>      | 4              | Sterol carrier protein 2                                     |
| <i>Cpt1a</i>     | 4              | Carnitine palmitoyltransferase 1A                            |
| <i>Khdrbs1</i>   | 4              | KH containing, RNA binding, signal transduction associated 1 |
| <i>Fus</i>       | 4              | Fused in sarcoma                                             |
| <i>Srpk2</i>     | 4              | SFRS protein kinase 2                                        |
| <i>Hnrnpk</i>    | 4              | Heterogeneous nuclear ribonucleoprotein K                    |
| <i>Hnrnpa1</i>   | 4              | Heterogeneous nuclear ribonucleoprotein A1                   |
| <i>Htra2</i>     | 4              | Htra serine peptidase 2                                      |
| <i>Egfl6</i>     | 4              | EGF-like-, multiple 6                                        |
| <i>Slit2</i>     | 4              | Slit homolog 2                                               |

**Table S4.** Genes associated with cancer showing circadian oscillations in expression

| <b>Symbol</b>  | <b>Cluster</b> | <b>Gene name</b>                                      |
|----------------|----------------|-------------------------------------------------------|
| <i>Ptprd</i>   | 4              | Protein tyrosine phosphatase, receptor , D            |
| <i>Tfpi</i>    | 4              | Tissue factor pathway inhibitor                       |
| <i>Ppp6c</i>   | 4              | Protein phosphatase 6, catalytic subunit              |
| <i>Fyn</i>     | 4              | FYN oncogene related to SRC, FGR, YES                 |
| <i>Ptch1</i>   | 4              | Patched homolog 1                                     |
| <i>Flt4</i>    | 4              | Fms-related tyrosine kinase 4                         |
| <i>Asap1</i>   | 4              | Arfgap with SH3 , ankyrin repeat & PH 1               |
| <i>Angpt1</i>  | 4              | Angiopoietin 1                                        |
| <i>Rgs2</i>    | 4              | Regulator of G-protein signaling 2, 24kda             |
| <i>Dab2</i>    | 4              | Disabled homolog 2                                    |
| <i>Flt1</i>    | 4              | Fms-related tyrosine kinase 1                         |
| <i>Fgfr2</i>   | 4              | Fibroblast growth factor receptor 2                   |
| <i>Mapk1</i>   | 4              | Mitogen-activated protein kinase 1                    |
| <i>Gas6</i>    | 4              | Growth arrest-specific 6                              |
| <i>Tbk1</i>    | 4              | TANK-binding kinase 1                                 |
| <i>Grlf1</i>   | 4              | Glucocorticoid receptor DNA binding factor 1          |
| <i>Setdb1</i>  | 4              | SET , bifurcated 1                                    |
| <i>Etv5</i>    | 4              | Ets variant 5                                         |
| <i>Eya4</i>    | 4              | Eyes absent homolog 4                                 |
| <i>Cited2</i>  | 4              | Cbp/p300-interacting transactivator, 2                |
| <i>Rbm3</i>    | 4              | RNA binding protein 3                                 |
| <i>Slc12a6</i> | 4              | Solute carrier 12 , 6                                 |
| <i>Heph</i>    | 4              | Hephaestin                                            |
| <i>Marcks</i>  | 4              | Myristoylated alanine-rich protein kinase C substrate |
| <i>Nell1</i>   | 5              | NEL-like 1                                            |
| <i>Rb1cc1</i>  | 5              | RB1-inducible coiled-coil 1                           |
| <i>Wasl</i>    | 5              | Wiskott-Aldrich syndrome-like                         |
| <i>Adam33</i>  | 5              | ADAM metallopeptidase 33                              |
| <i>Frat2</i>   | 5              | Frequently rearranged in advanced T-cell lymphomas 2  |
| <i>Rere</i>    | 5              | Arginine-glutamic acid dipeptide repeats              |
| <i>Hbp1</i>    | 5              | HMG-box transcription factor 1                        |
| <i>Arid4a</i>  | 6              | AT rich interactive 4A                                |
| <i>Rbbp6</i>   | 6              | Retinoblastoma binding protein 6                      |
| <i>Gadd45b</i> | 6              | Growth arrest & DNA-damage-inducible, $\beta$         |
| <i>Cdk8</i>    | 6              | Cyclin-dependent kinase 8                             |
| <i>Rgc32</i>   | 6              | Response gene to complement 32                        |
| <i>Ndrp2</i>   | 6              | NDRG 2                                                |
| <i>Wee1</i>    | 6              | WEE1 homolog                                          |
| <i>Mgp</i>     | 6              | Matrix Gla protein                                    |
| <i>Itga6</i>   | 6              | Integrin, $\alpha$ 6                                  |
| <i>Adamts1</i> | 6              | ADAM metallopeptidase with thrombospondin 1 , 1       |
| <i>Alcam</i>   | 6              | Activated leukocyte cell adhesion molecule            |

**Table S4.** Genes associated with cancer showing circadian oscillations in expression

| <b>Symbol</b>  | <b>Cluster</b> | <b>Gene name</b>                                         |
|----------------|----------------|----------------------------------------------------------|
| <i>Aoc3</i>    | 6              | Amine oxidase, copper containing 3                       |
| <i>Rdh10</i>   | 6              | Retinol dehydrogenase 10                                 |
| <i>Mt2A</i>    | 6              | Metallothionein 2A                                       |
| <i>Cast</i>    | 6              | Calpastatin                                              |
| <i>Fkbp5</i>   | 6              | FK506 binding protein 5                                  |
| <i>Prkar2a</i> | 6              | Protein kinase, camp-dependent, regulatory, II, $\alpha$ |
| <i>Ddit4</i>   | 6              | DNA-damage-inducible transcript 4                        |
| <i>Lifr</i>    | 6              | Leukemia inhibitory factor receptor $\alpha$             |
| <i>Vipr1</i>   | 6              | Vasoactive intestinal peptide receptor 1                 |
| <i>Lrp6</i>    | 6              | Low density lipoprotein receptor-related protein 6       |
| <i>Tgfbr3</i>  | 6              | Transforming growth factor, $\beta$ receptor III         |
| <i>Rock2</i>   | 6              | Rho-associated, coiled-coil containing protein kinase 2  |
| <i>Map3k2</i>  | 6              | Mitogen-activated protein kinase kinase kinase 2         |
| <i>Robo2</i>   | 6              | Roundabout, axon guidance receptor, homolog 2            |
| <i>Dlg2</i>    | 6              | Discs, large homolog 2                                   |
| <i>Irs2</i>    | 6              | Insulin receptor substrate 2                             |
| <i>Gria3</i>   | 6              | Glutamate receptor, ionotropic, AMPA 3                   |
| <i>Ppl</i>     | 6              | Periplakin                                               |
| <i>Lpar1</i>   | 6              | Lysophosphatidic acid receptor 1                         |
| <i>Hlf</i>     | 6              | Hepatic leukemia factor                                  |
| <i>Klf9</i>    | 6              | Kruppel-like factor 9                                    |
| <i>Klf15</i>   | 6              | Kruppel-like factor 15                                   |
| <i>Bhlhe40</i> | 6              | Basic helix-loop-helix , e40                             |
| <i>Zhx3</i>    | 6              | Zinc fingers & homeoboxes 3                              |
| <i>Per3</i>    | 6              | Period homolog 3                                         |
| <i>Ctdspl</i>  | 6              | CTD small phosphatase-like                               |
| <i>Hey1</i>    | 6              | Hairy/enhancer-of-split related with YRPW 1              |
| <i>Nfib</i>    | 6              | Nuclear factor I/B                                       |
| <i>Csrnp1</i>  | 6              | Cysteine-serine-rich nuclear protein 1                   |
| <i>Cebpd</i>   | 6              | CCAAT/enhancer binding protein , $\delta$                |
| <i>Dnmt3a</i>  | 6              | DNA -methyltransferase 3 $\alpha$                        |
| <i>Rora</i>    | 6              | RAR-related orphan receptor A                            |
| <i>Klf6</i>    | 6              | Kruppel-like factor 6                                    |
| <i>Ncoa3</i>   | 6              | Nuclear receptor coactivator 3                           |
| <i>Eif4b</i>   | 6              | Eukaryotic translation initiation factor 4B              |
| <i>Eef2k</i>   | 6              | Eukaryotic elongation factor-2 kinase                    |
| <i>Steap2</i>  | 6              | Six transmembrane epithelial antigen of the prostate 2   |
| <i>Timp3</i>   | 7              | TIMP metalloproteinase inhibitor 3                       |
| <i>Timp4</i>   | 7              | TIMP metalloproteinase inhibitor 4                       |
| <i>Cd163</i>   | 7              | CD163 molecule                                           |
| <i>Fmo2</i>    | 7              | Flavin containing monooxygenase 2                        |
| <i>Sult1a1</i> | 7              | Sulfotransferase , cytosolic, 1A, phenol-preferring, 1   |

**Table S4.** Genes associated with cancer showing circadian oscillations in expression

| <b>Symbol</b>  | <b>Cluster</b> | <b>Gene name</b>                                             |
|----------------|----------------|--------------------------------------------------------------|
| <i>Cdo1</i>    | 7              | Cysteine dioxygenase, I                                      |
| <i>Smpd3</i>   | 7              | Sphingomyelin phosphodiesterase 3, neutral membrane          |
| <i>Psen1</i>   | 7              | Presenilin 1                                                 |
| <i>Ctgf</i>    | 7              | Connective tissue growth factor                              |
| <i>Plxna2</i>  | 7              | ---                                                          |
| <i>Areg</i>    | 7              | Amphiregulin                                                 |
| <i>Nrg4</i>    | 7              | Neuregulin 4                                                 |
| <i>Ptprg</i>   | 7              | Protein tyrosine phosphatase, receptor , G                   |
| <i>Sik1</i>    | 7              | Salt-inducible kinase 1                                      |
| <i>Tsc22d3</i> | 7              | TSC22 , 3                                                    |
| <i>Baz2a</i>   | 7              | Bromo adjacent to zinc finger , 2A                           |
| <i>Mybl1</i>   | 7              | V-myb myeloblastosis viral oncogene homolog -like 1          |
| <i>Mlc1</i>    | 7              | Megalencephalic leukoencephalopathy with subcortical cysts 1 |
| <i>Sncg</i>    | 8              | Synuclein, $\gamma$                                          |
| <i>Tdg</i>     | 8              | Thymine-DNA glycosylase                                      |
| <i>Reln</i>    | 8              | Reelin                                                       |
| <i>Hspb1</i>   | 8              | Heat shock 27kda protein 1                                   |
| <i>Plcb1</i>   | UC             | Phospholipase C, $\beta$ 1                                   |
| <i>Ppp1r7</i>  | UC             | Protein phosphatase 1, regulatory subunit 7                  |
