# Supplementary material
Source: PubMed Central journal article supplement (PMC3119131)

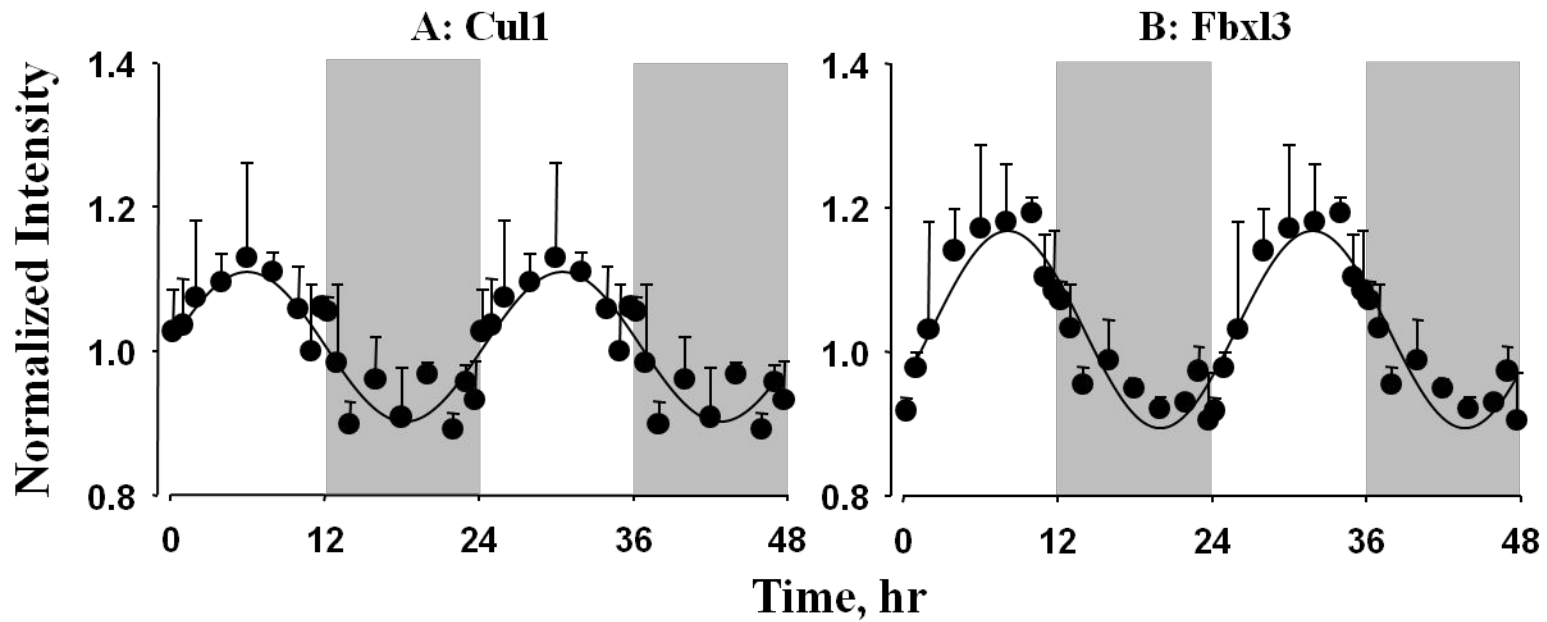

**Figure Sup 1.**

Supplement: supp_japplphysiol.00079.2011_figS1.pdf [file supp_japplphysiol.00079.2011_figS1.pdf]

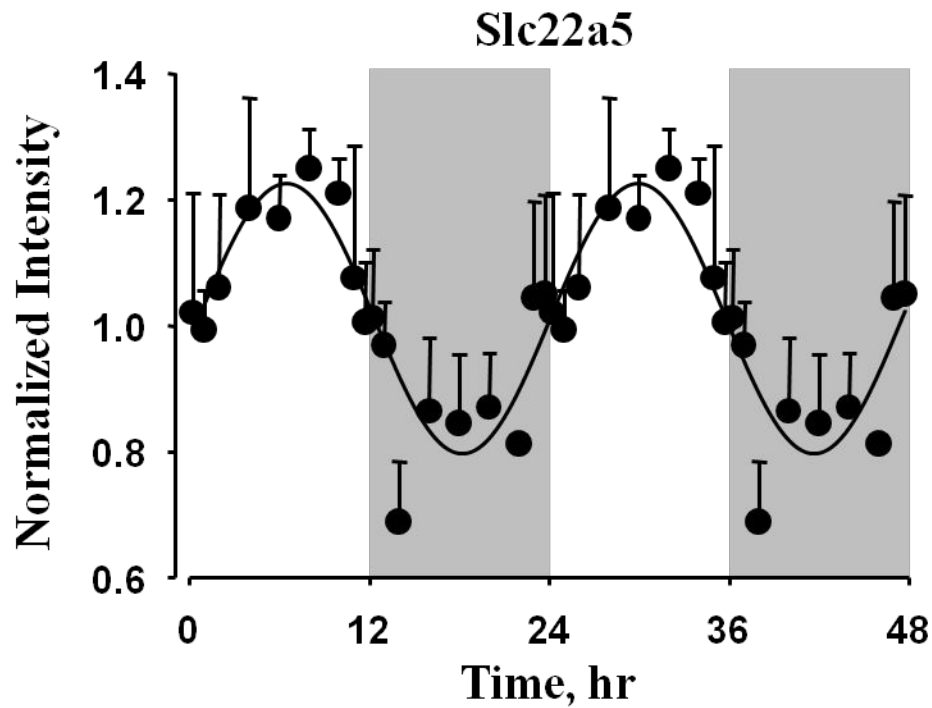

**Figure Sup 2.**

Supplement: supp_japplphysiol.00079.2011_figS2.pdf [file supp_japplphysiol.00079.2011_figS2.pdf]
